# Supplementary material for: Copper-Catalyzed One-Pot Synthesis of N-Sulfonyl Amidines from Sulfonyl Hydrazine, Terminal Alkynes and Sulfonyl Azides
Source: MDPI journal article supplement (doi:10.3390/molecules26123700), 2021-06-17

# Copper-catalyzed one-pot synthesis of *N*-sulfonyl amidines from sulfonyl hydrazine, 1-alkynes, and *N*-sulfonyl azides

Yu Zhao <sup>#,1</sup>, Zitong Zhou <sup>#,1</sup>, Man Chen <sup>1</sup> and Weiguang Yang <sup>1,2,\*</sup>

<sup>#</sup> *These authors contributed equally*

<sup>1</sup> *The Marine Biomedical Research Institute, Guangdong Medical University, Zhanjiang, 524023, China.*

<sup>2</sup> *The Marine Biomedical Research Institute of Guangdong Zhanjiang, Zhanjiang, Guangdong, 524023, China.*

Email: [09ywg@163.com](mailto:09ywg@163.com)

## Table of contents

|                                                            |   |
|------------------------------------------------------------|---|
| 1. The structures of starting materials <b>1a-1f</b> ..... | 2 |
| 2. General Information.....                                | 3 |
| 3 NMR spectra.....                                         | 4 |

## 1. The structures of starting materials 1a-1f

### Structures of the starting materials 1a-1f

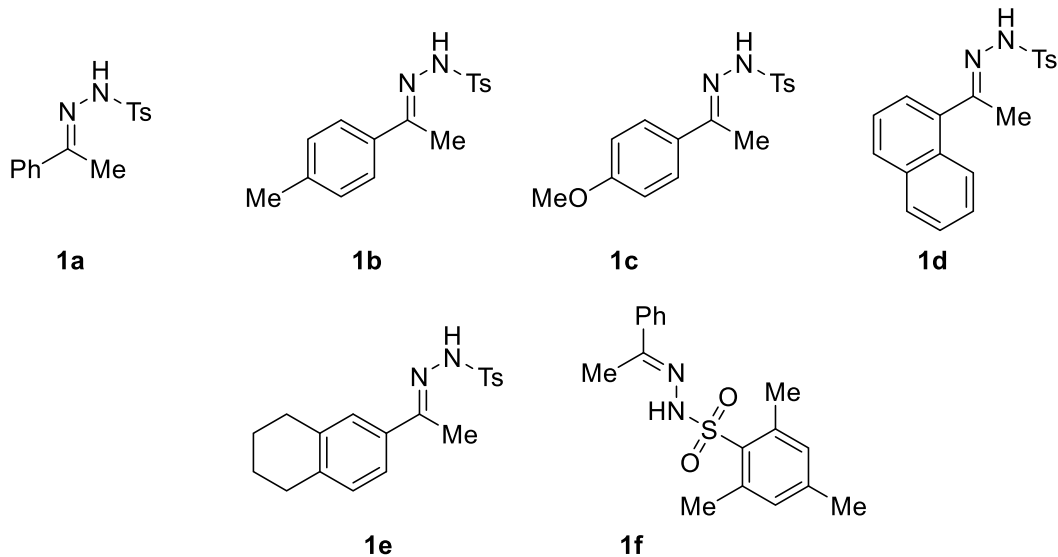

### Structures of the starting materials 2a-2f

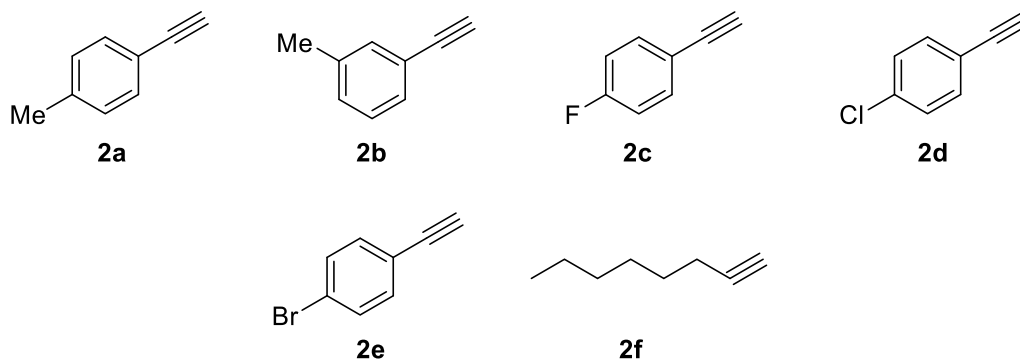

### Structures of the starting materials 3a-3e

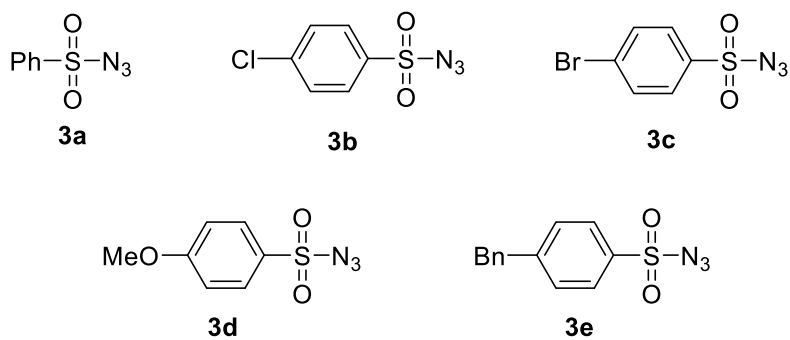

## 2. General Information

All melting points were determined on a Yanaco melting point apparatus and were uncorrected. IR spectra were recorded as KBr pellets on a Nicolet FT-IR 5DX spectrometer. All spectra of  $^1\text{H}$  NMR (400 MHz) and  $^{13}\text{C}$  NMR (100 MHz) were measured on a 400 MHz Bruker spectrometer using  $\text{DMSO-}d_6$  or  $\text{CDCl}_3$  as the solvent with tetramethylsilane (TMS) as the internal standard at room temperature. . Chemical shifts are given in  $\delta$  relative to TMS, the coupling constants  $J$  are given in Hz. HRMS were obtained on a Bruker micrOTOF-Q II spectrometer.

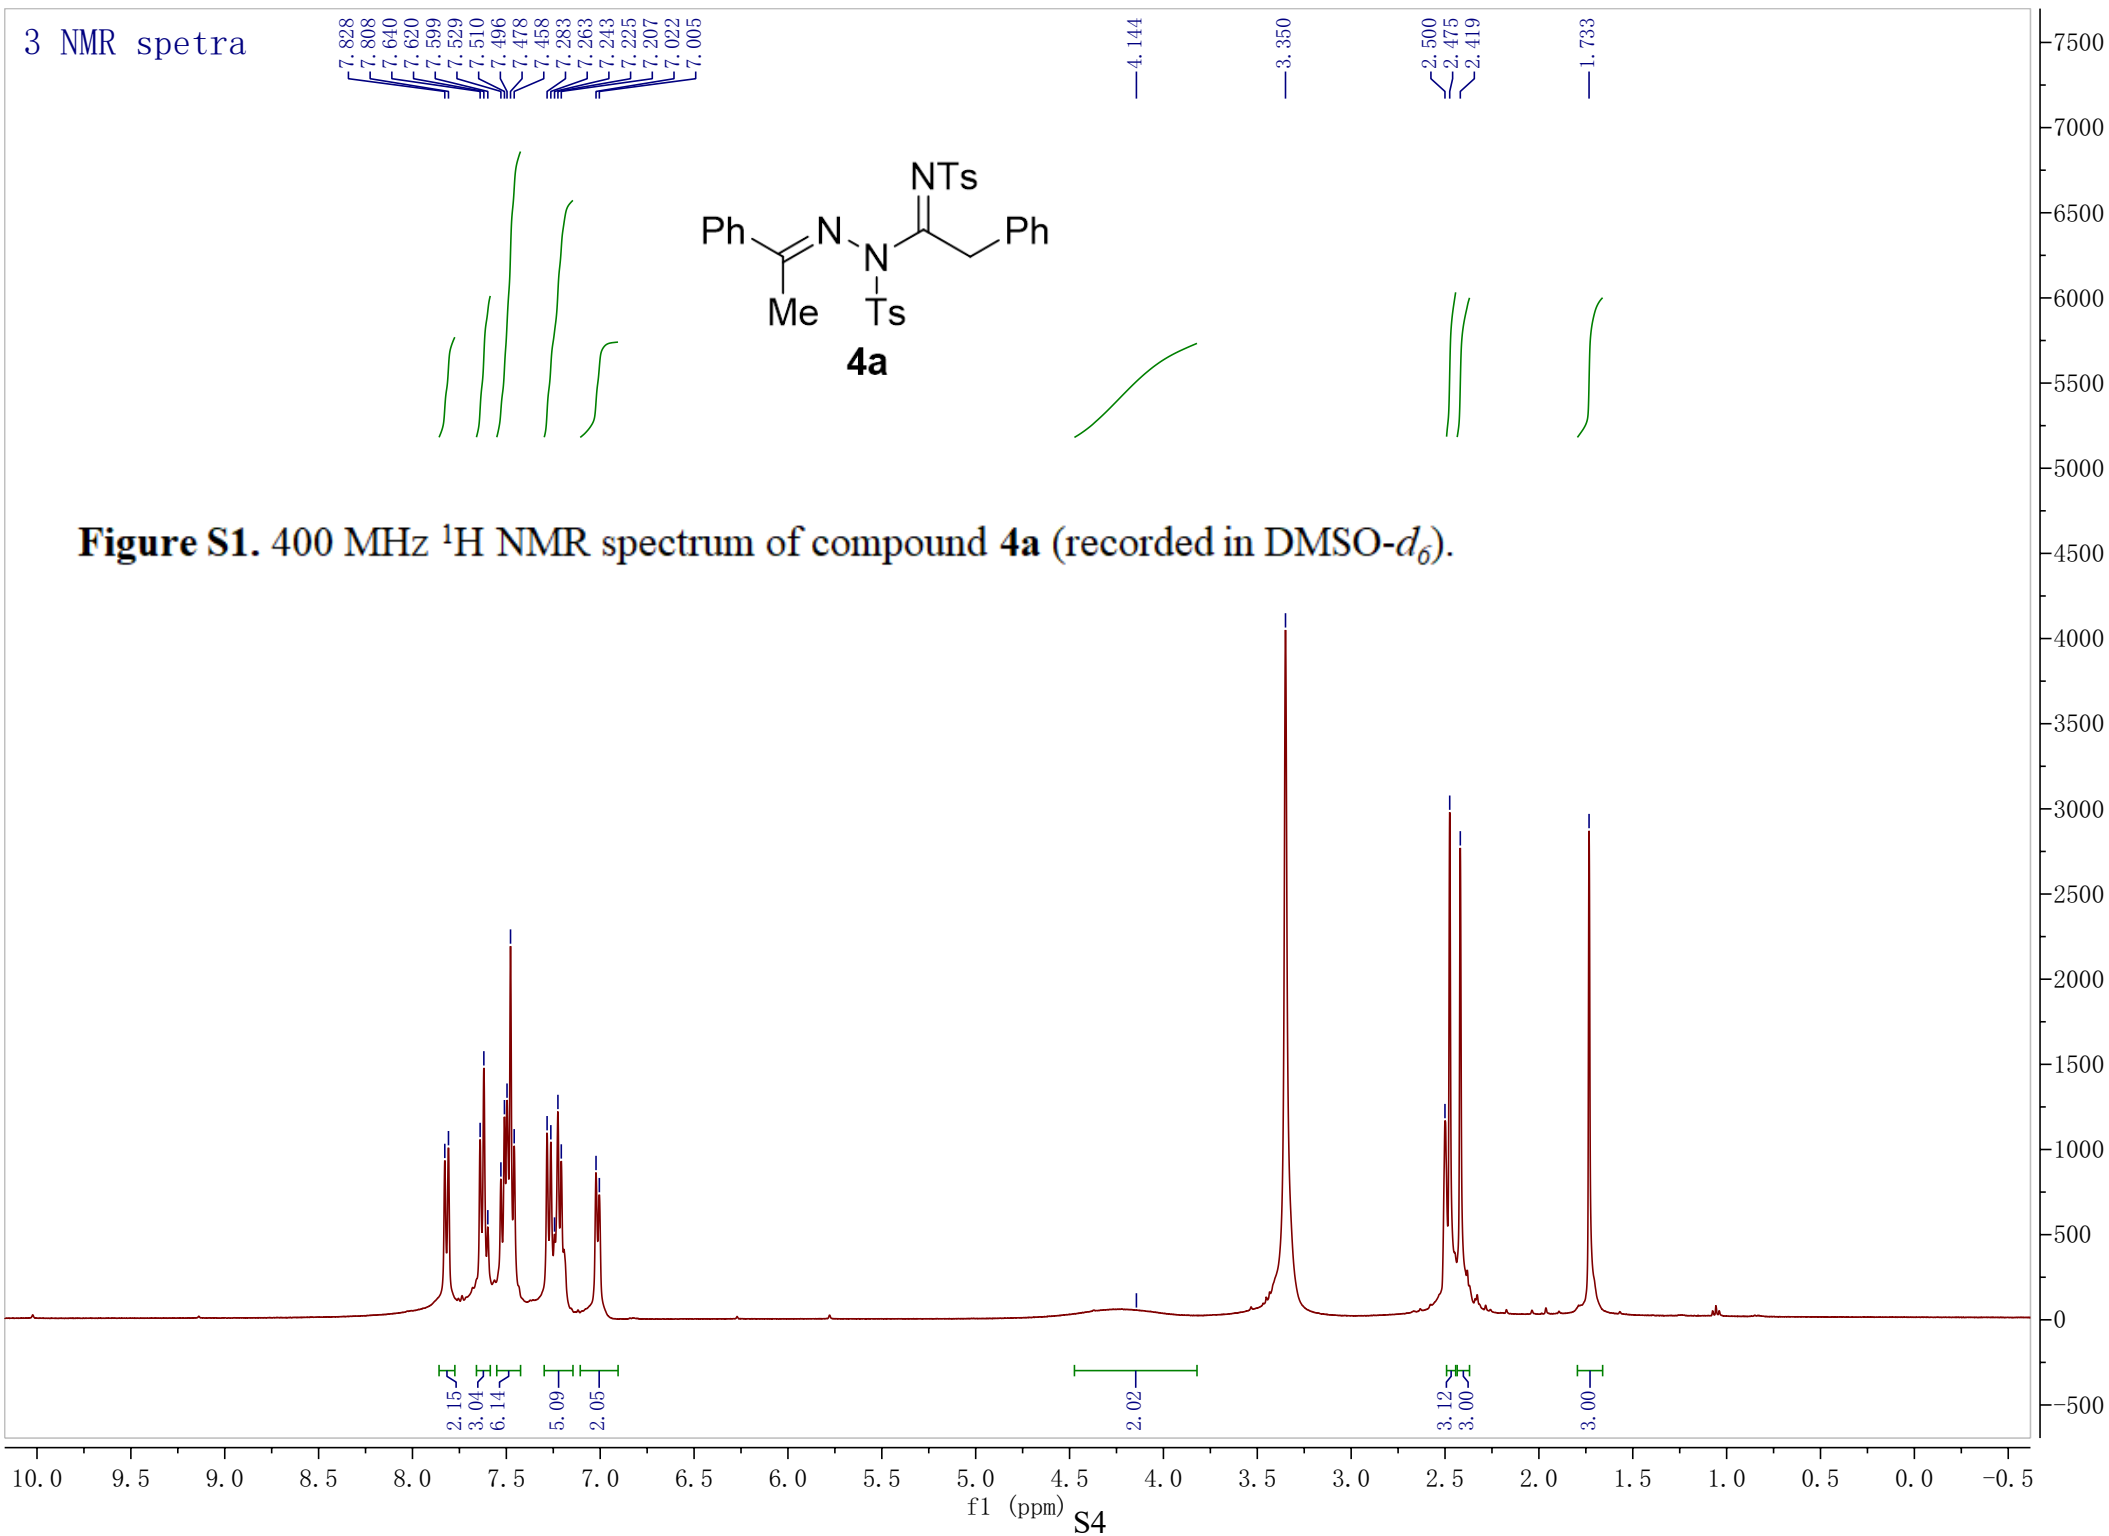

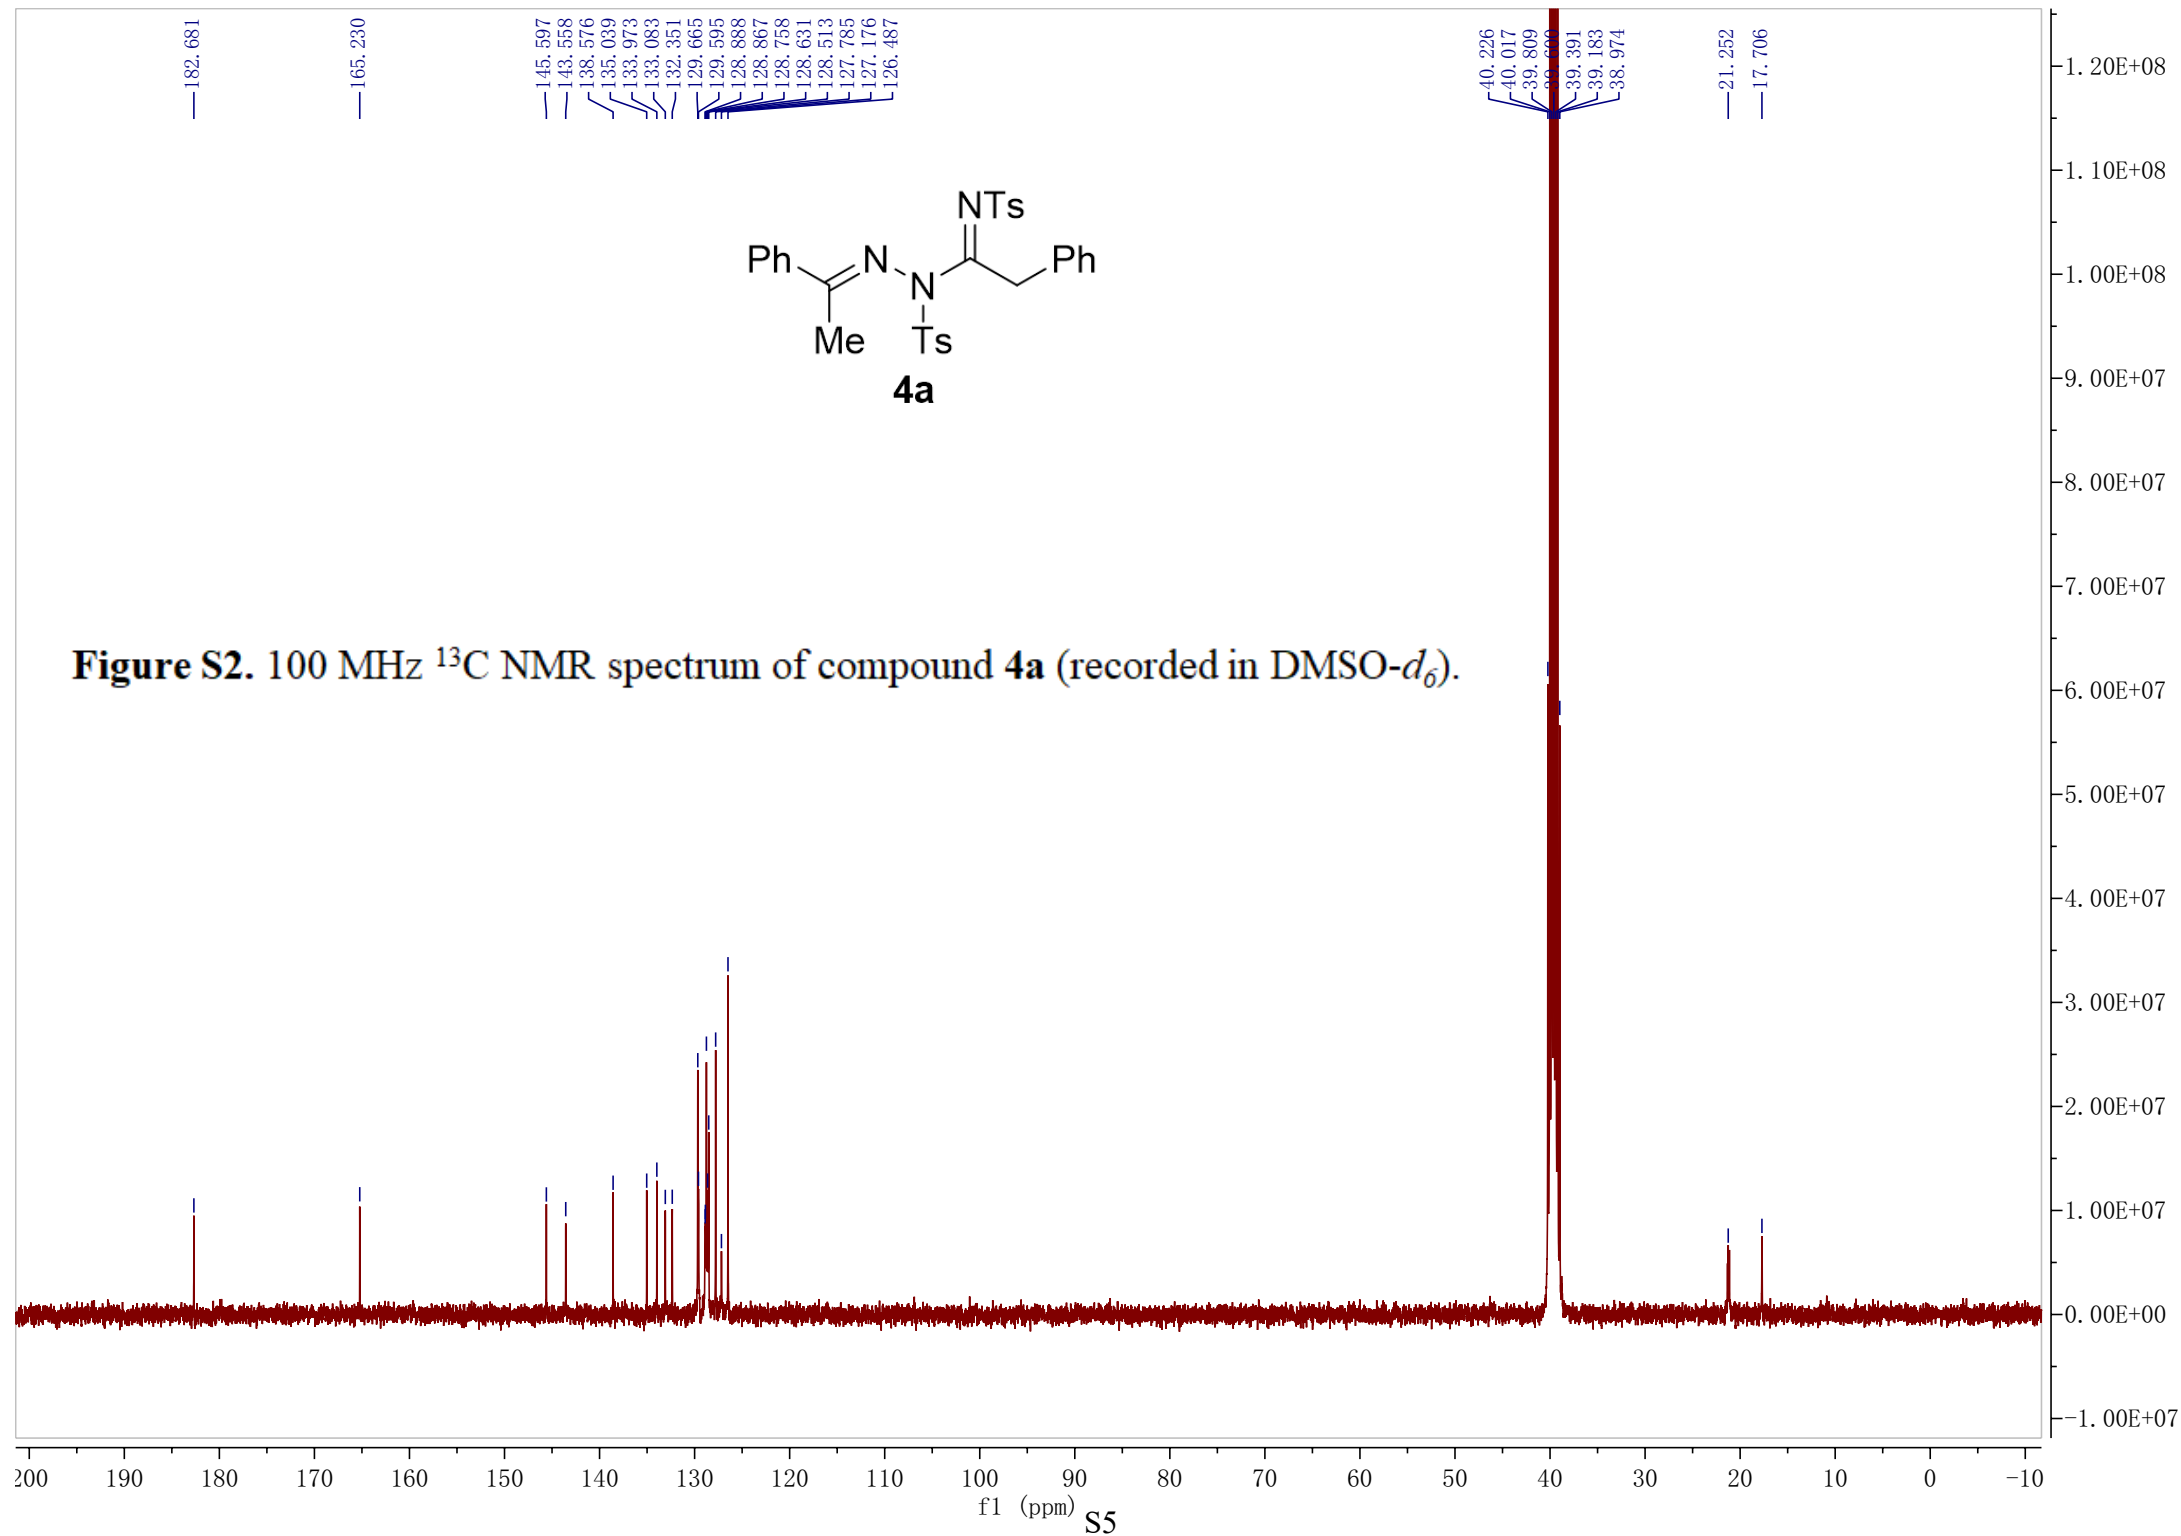

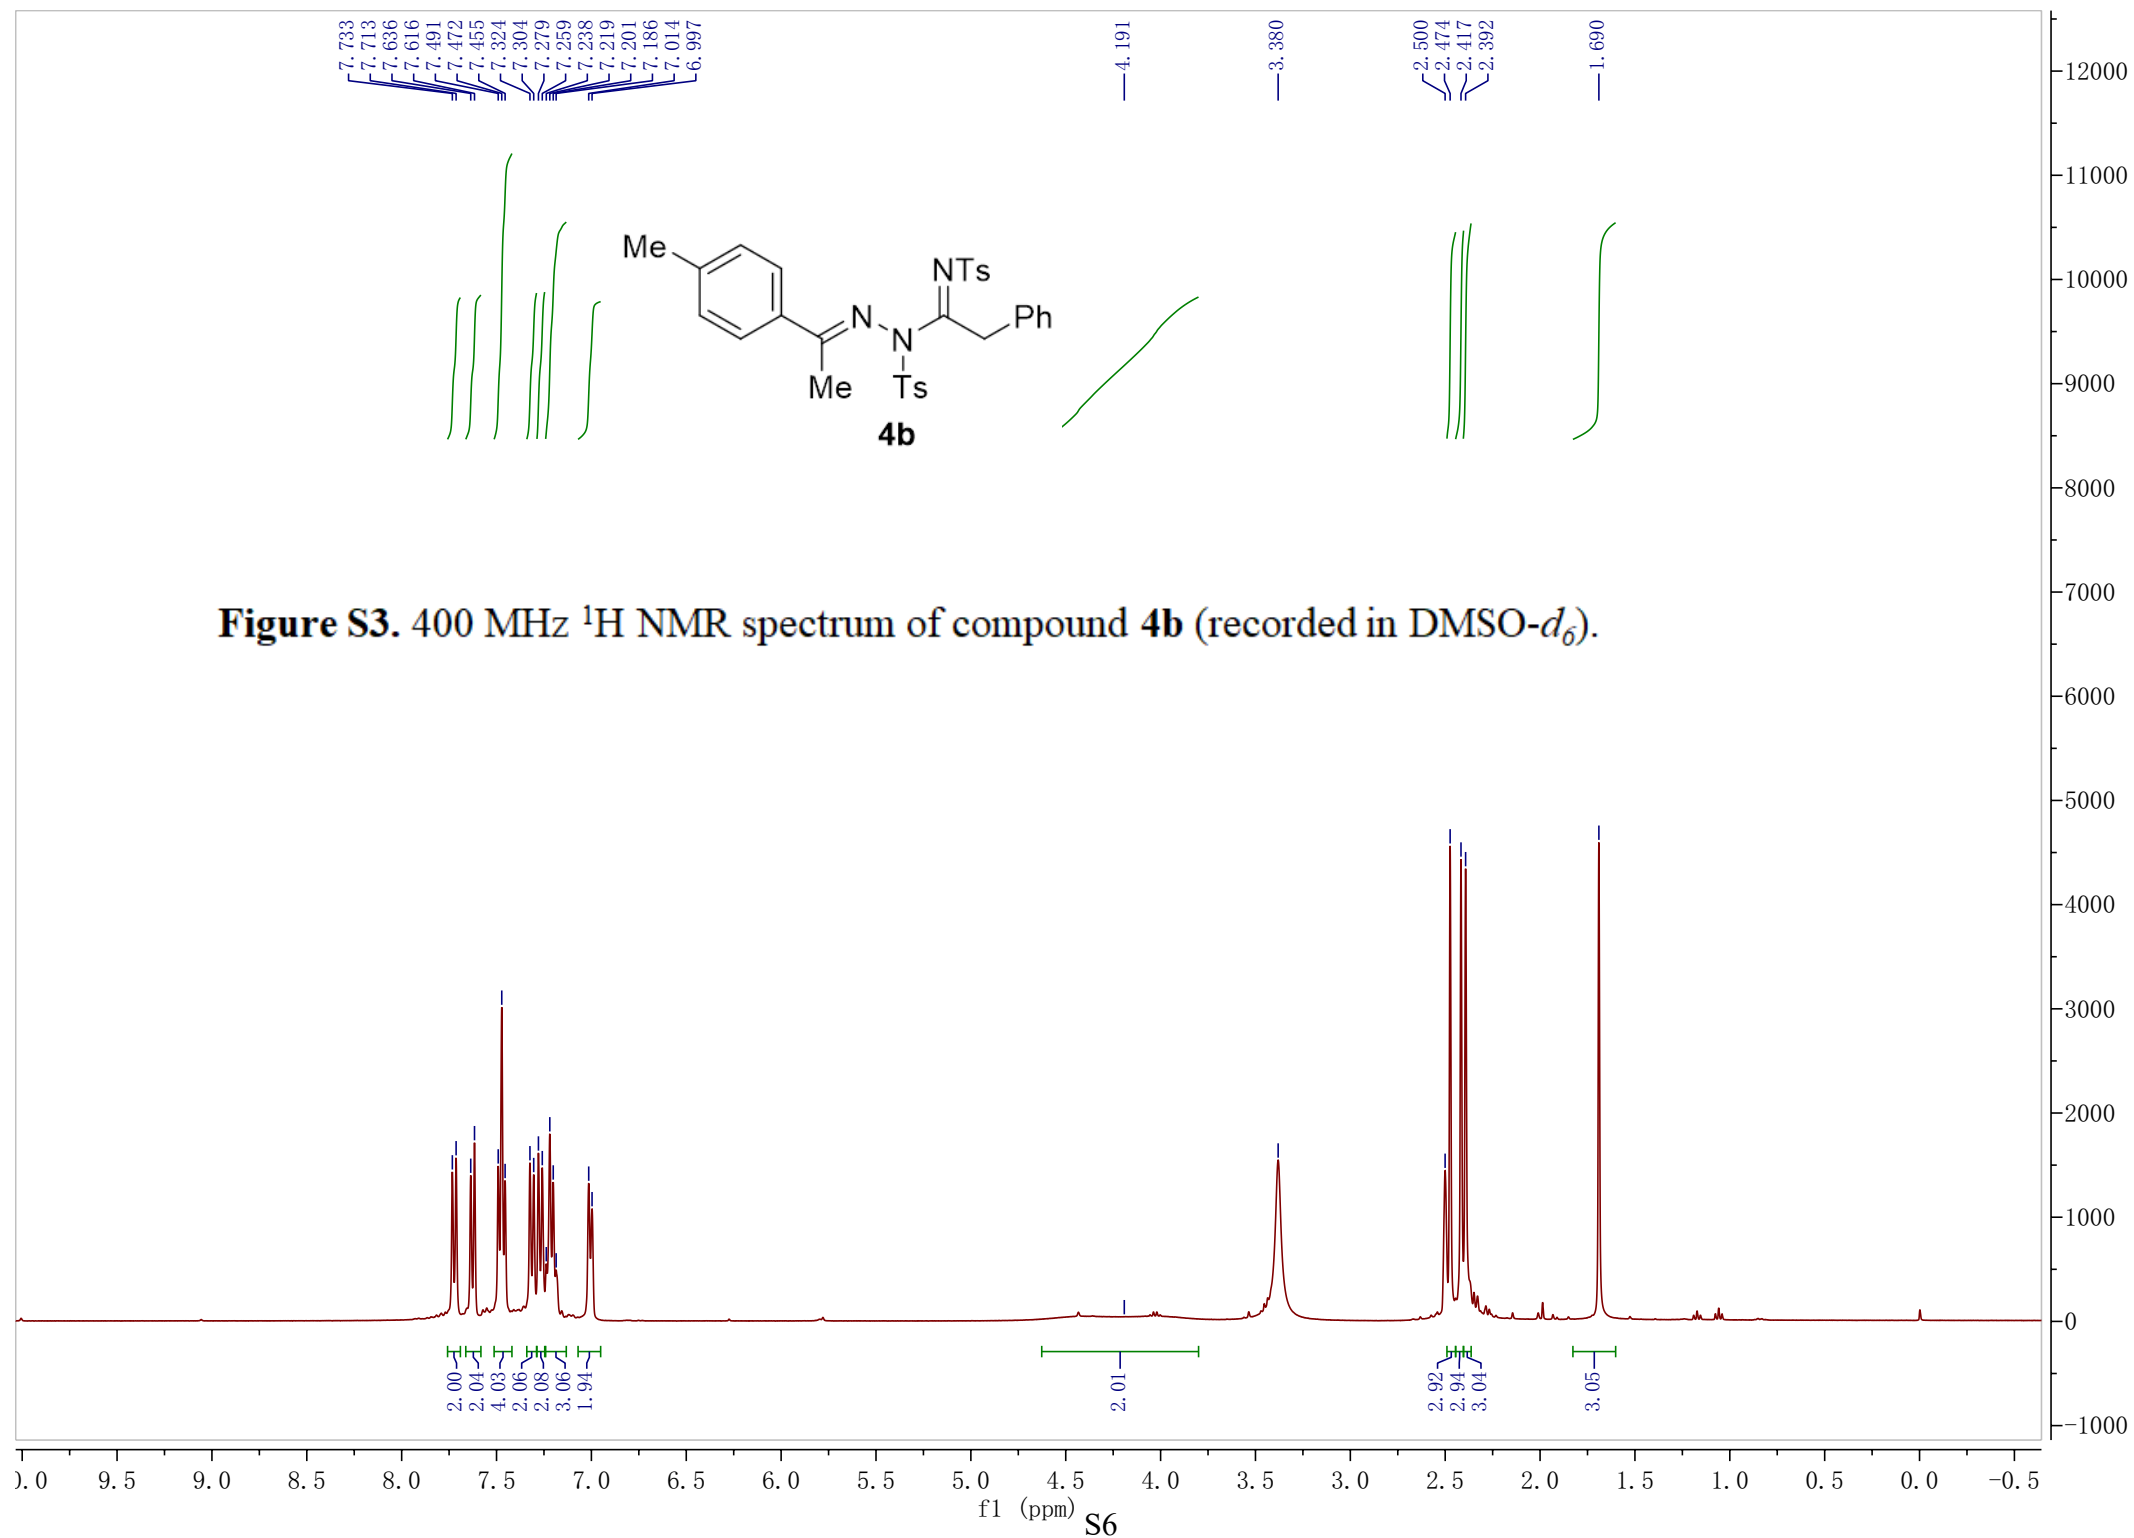

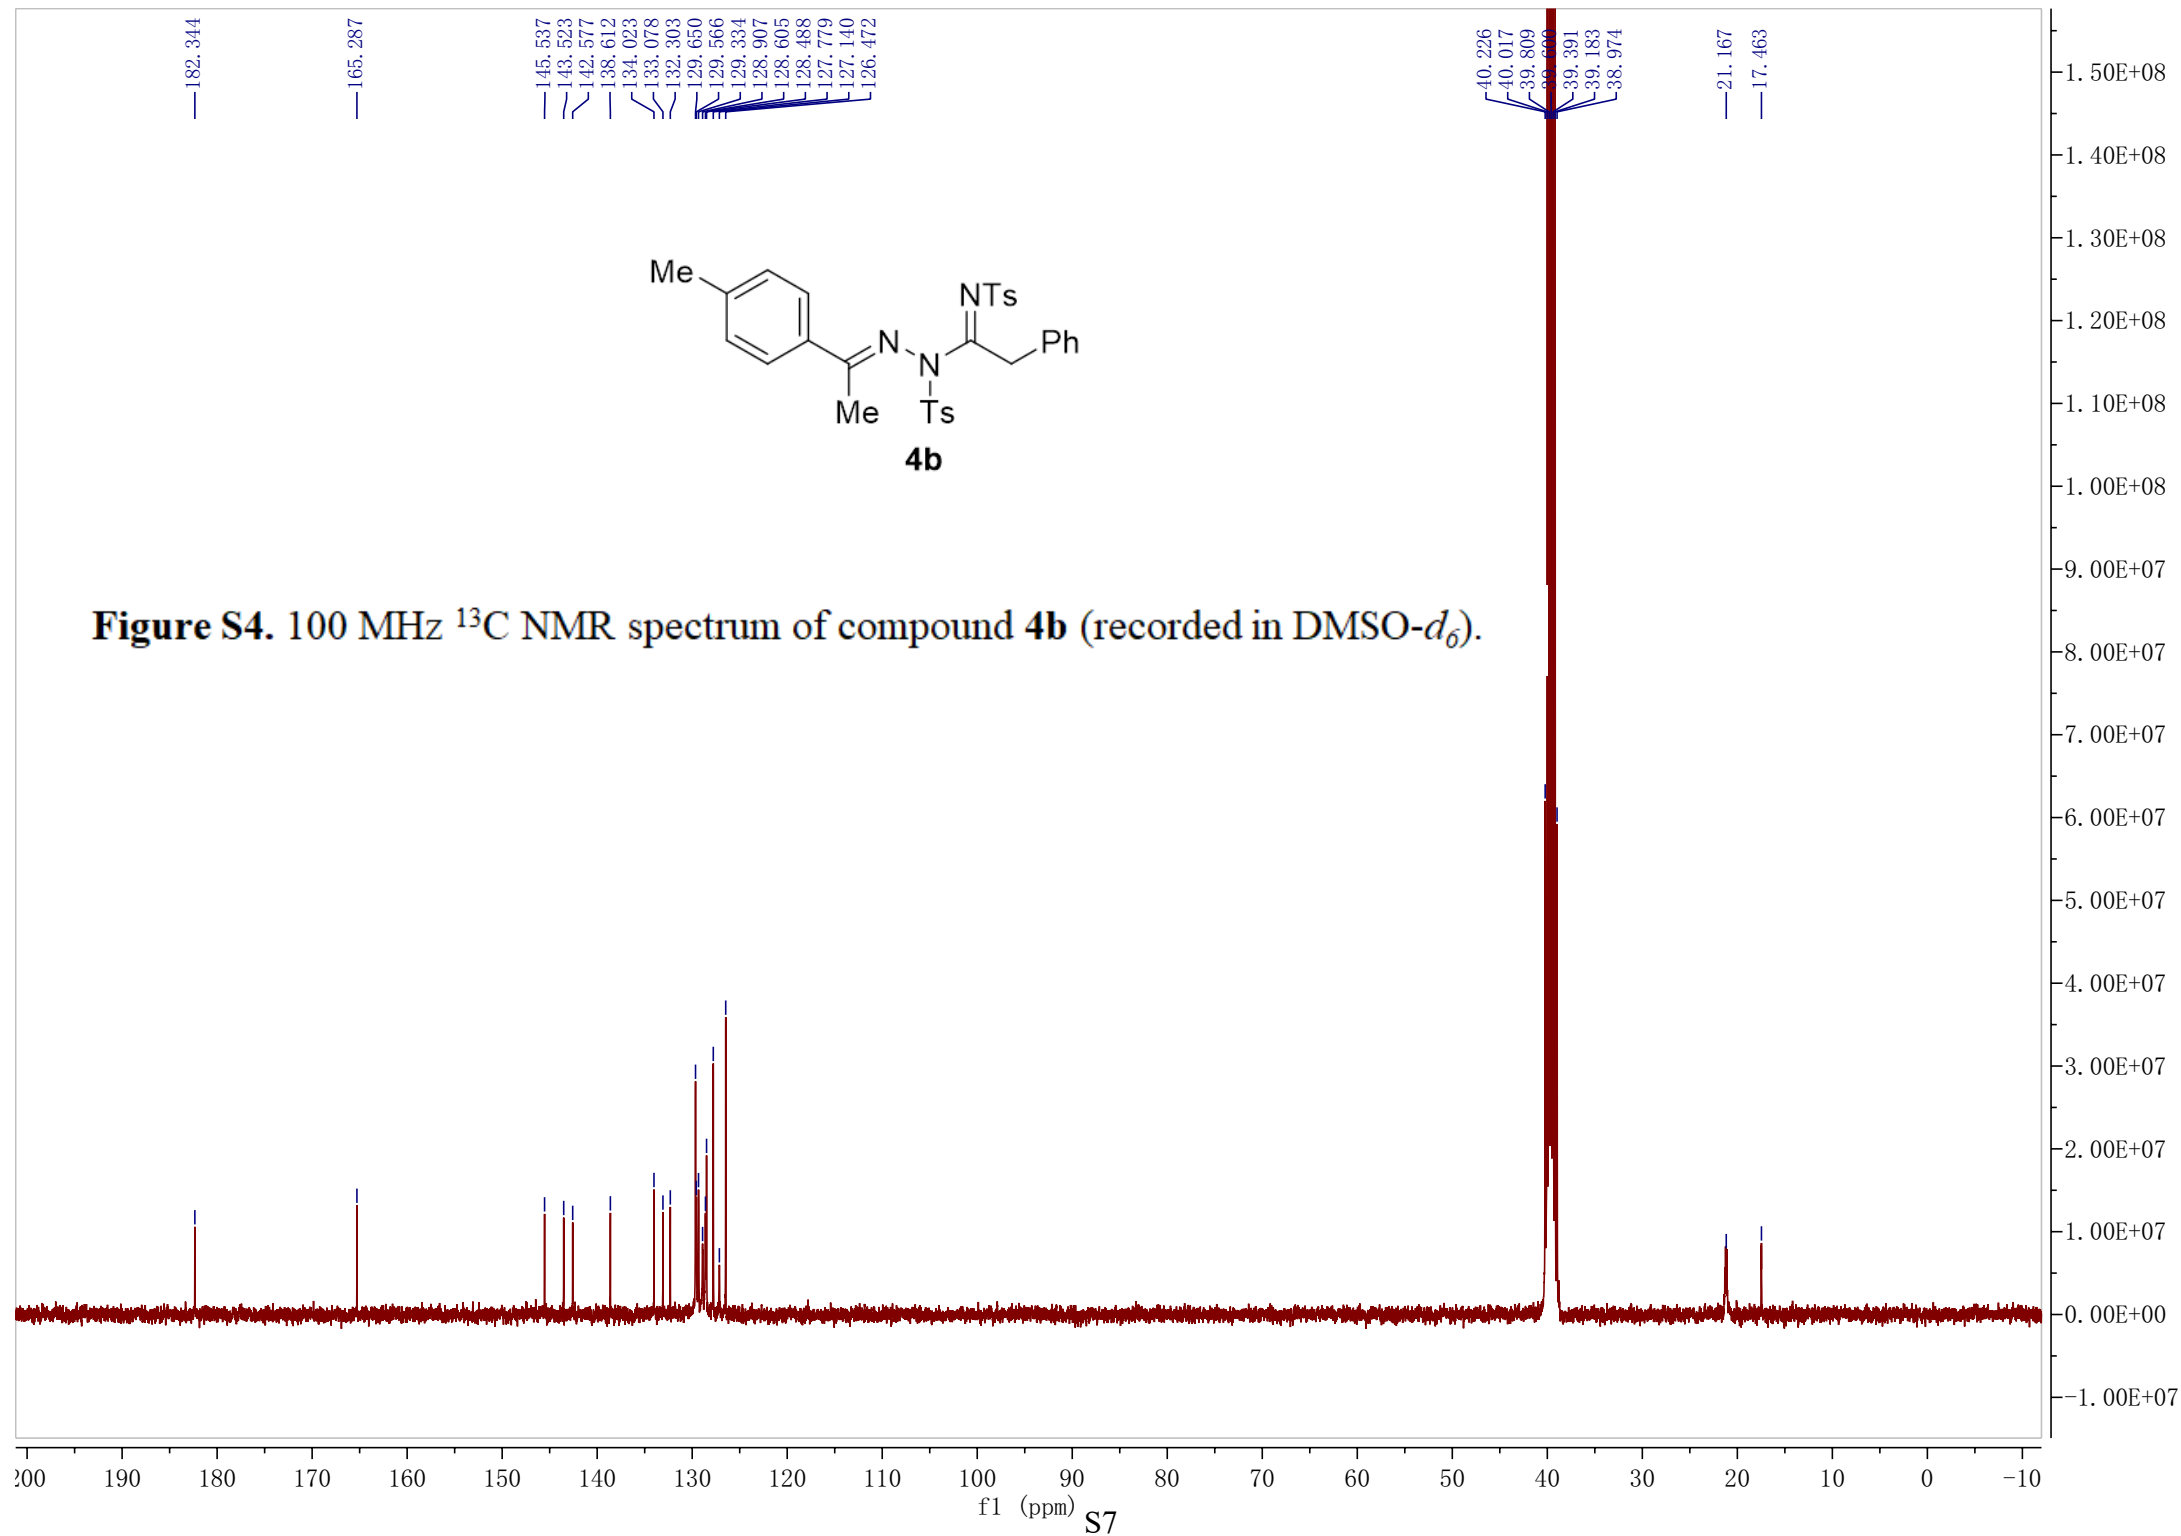

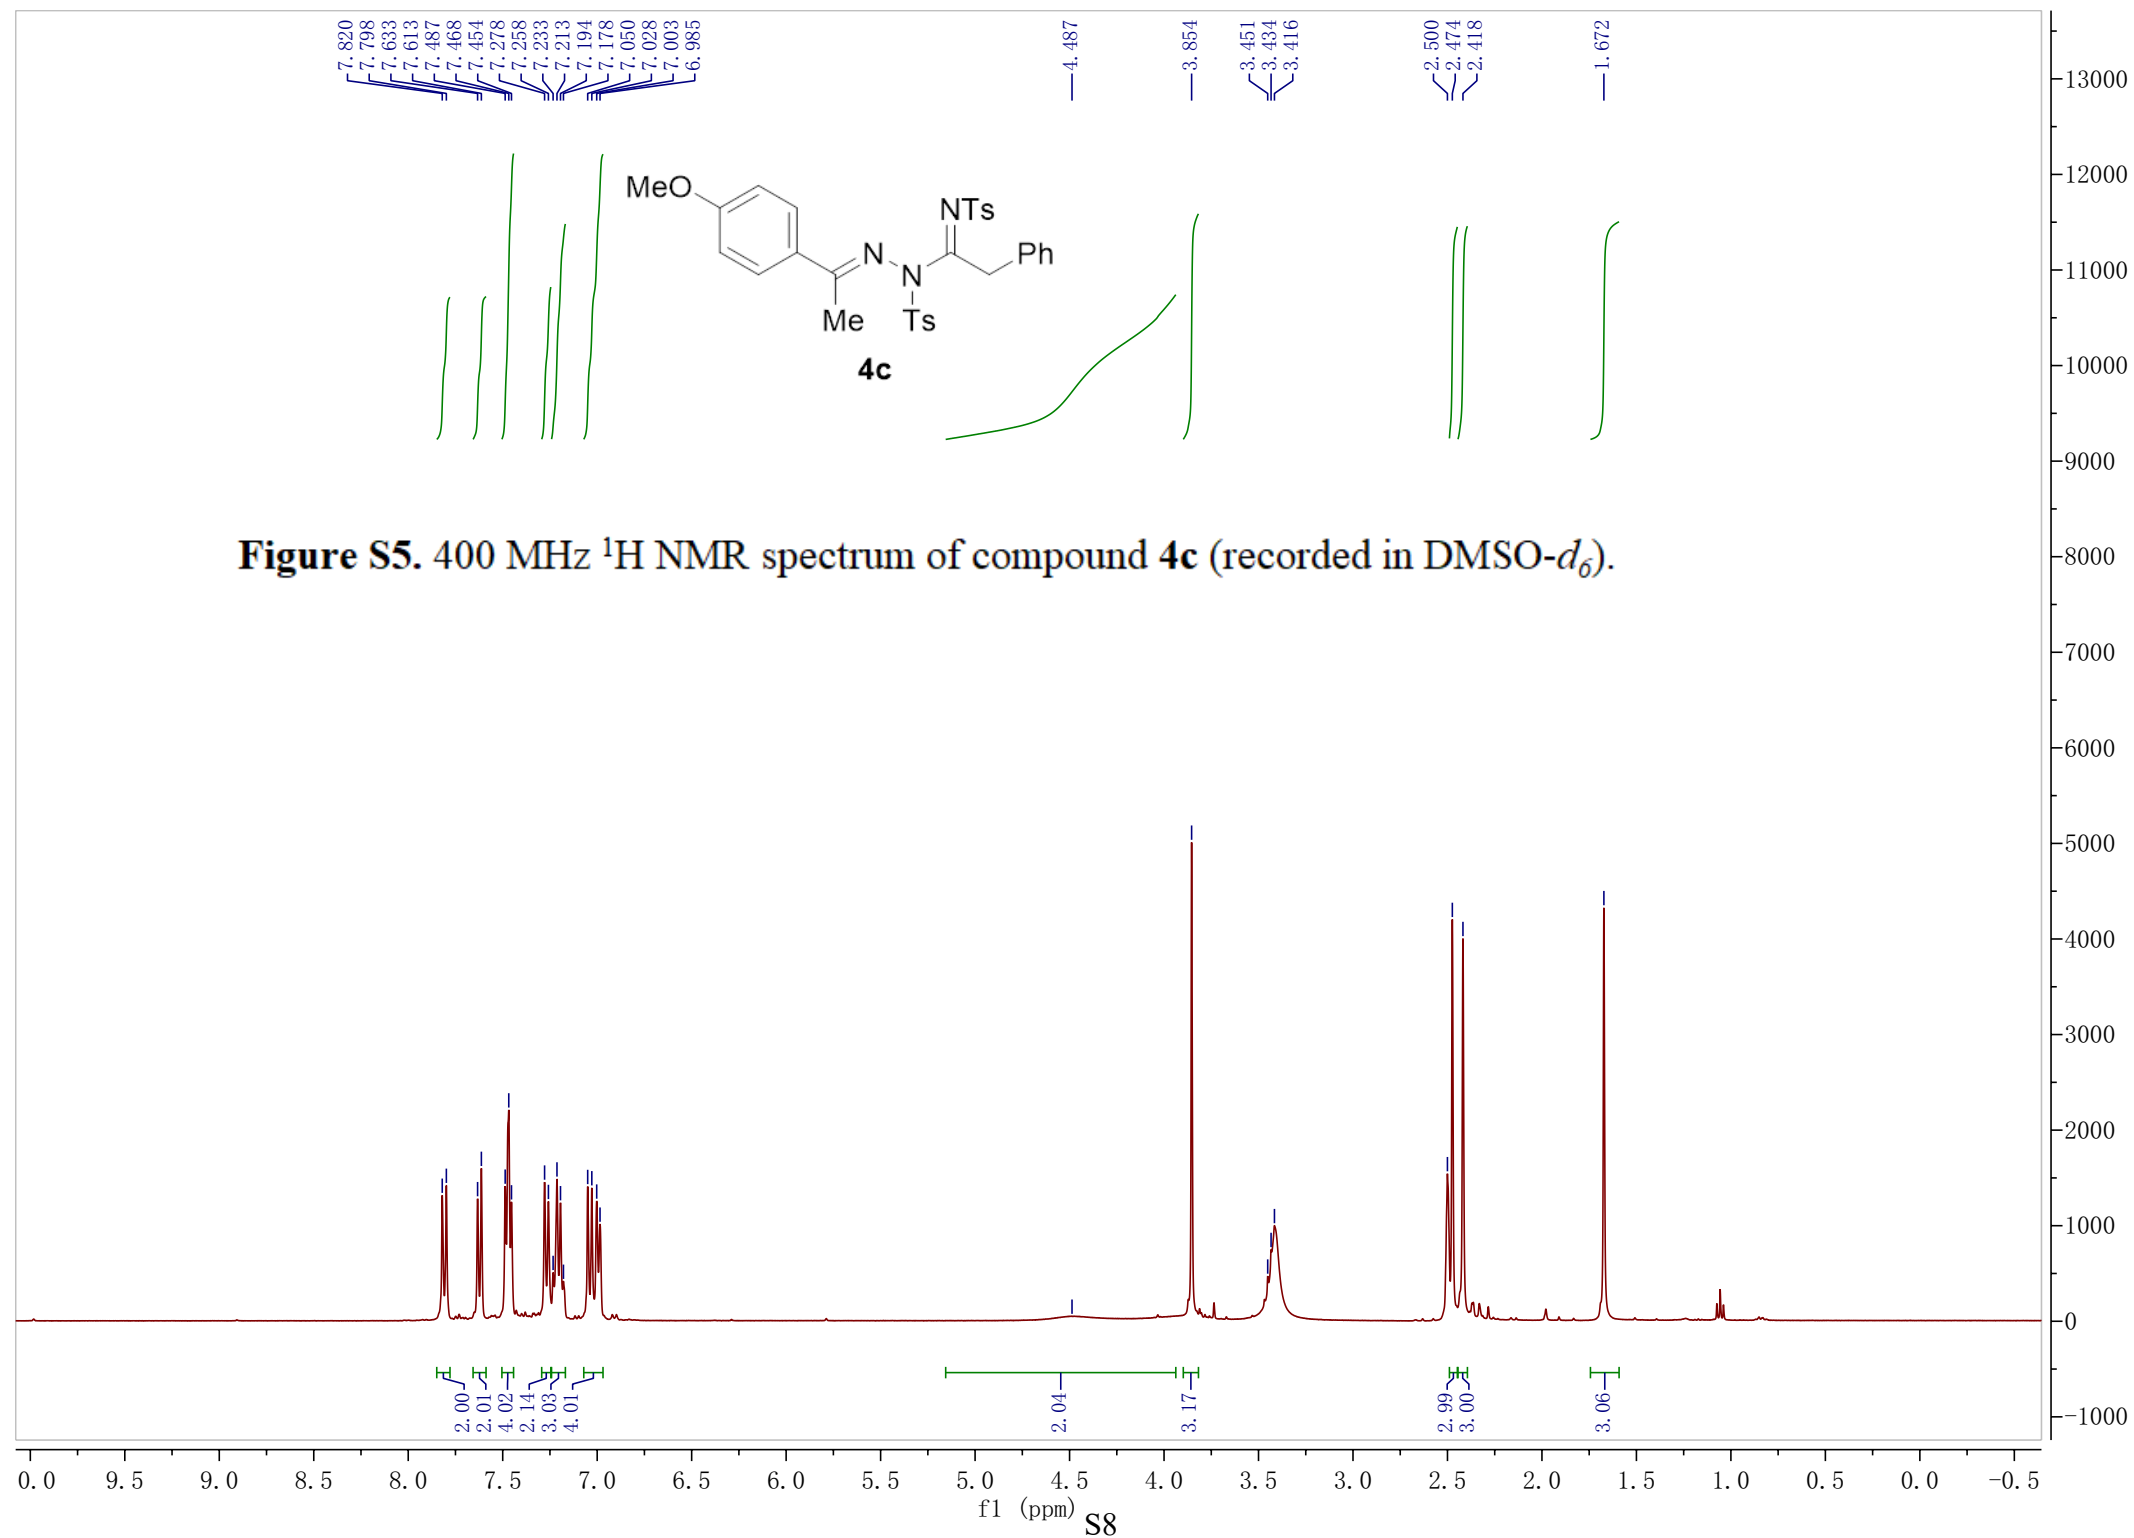



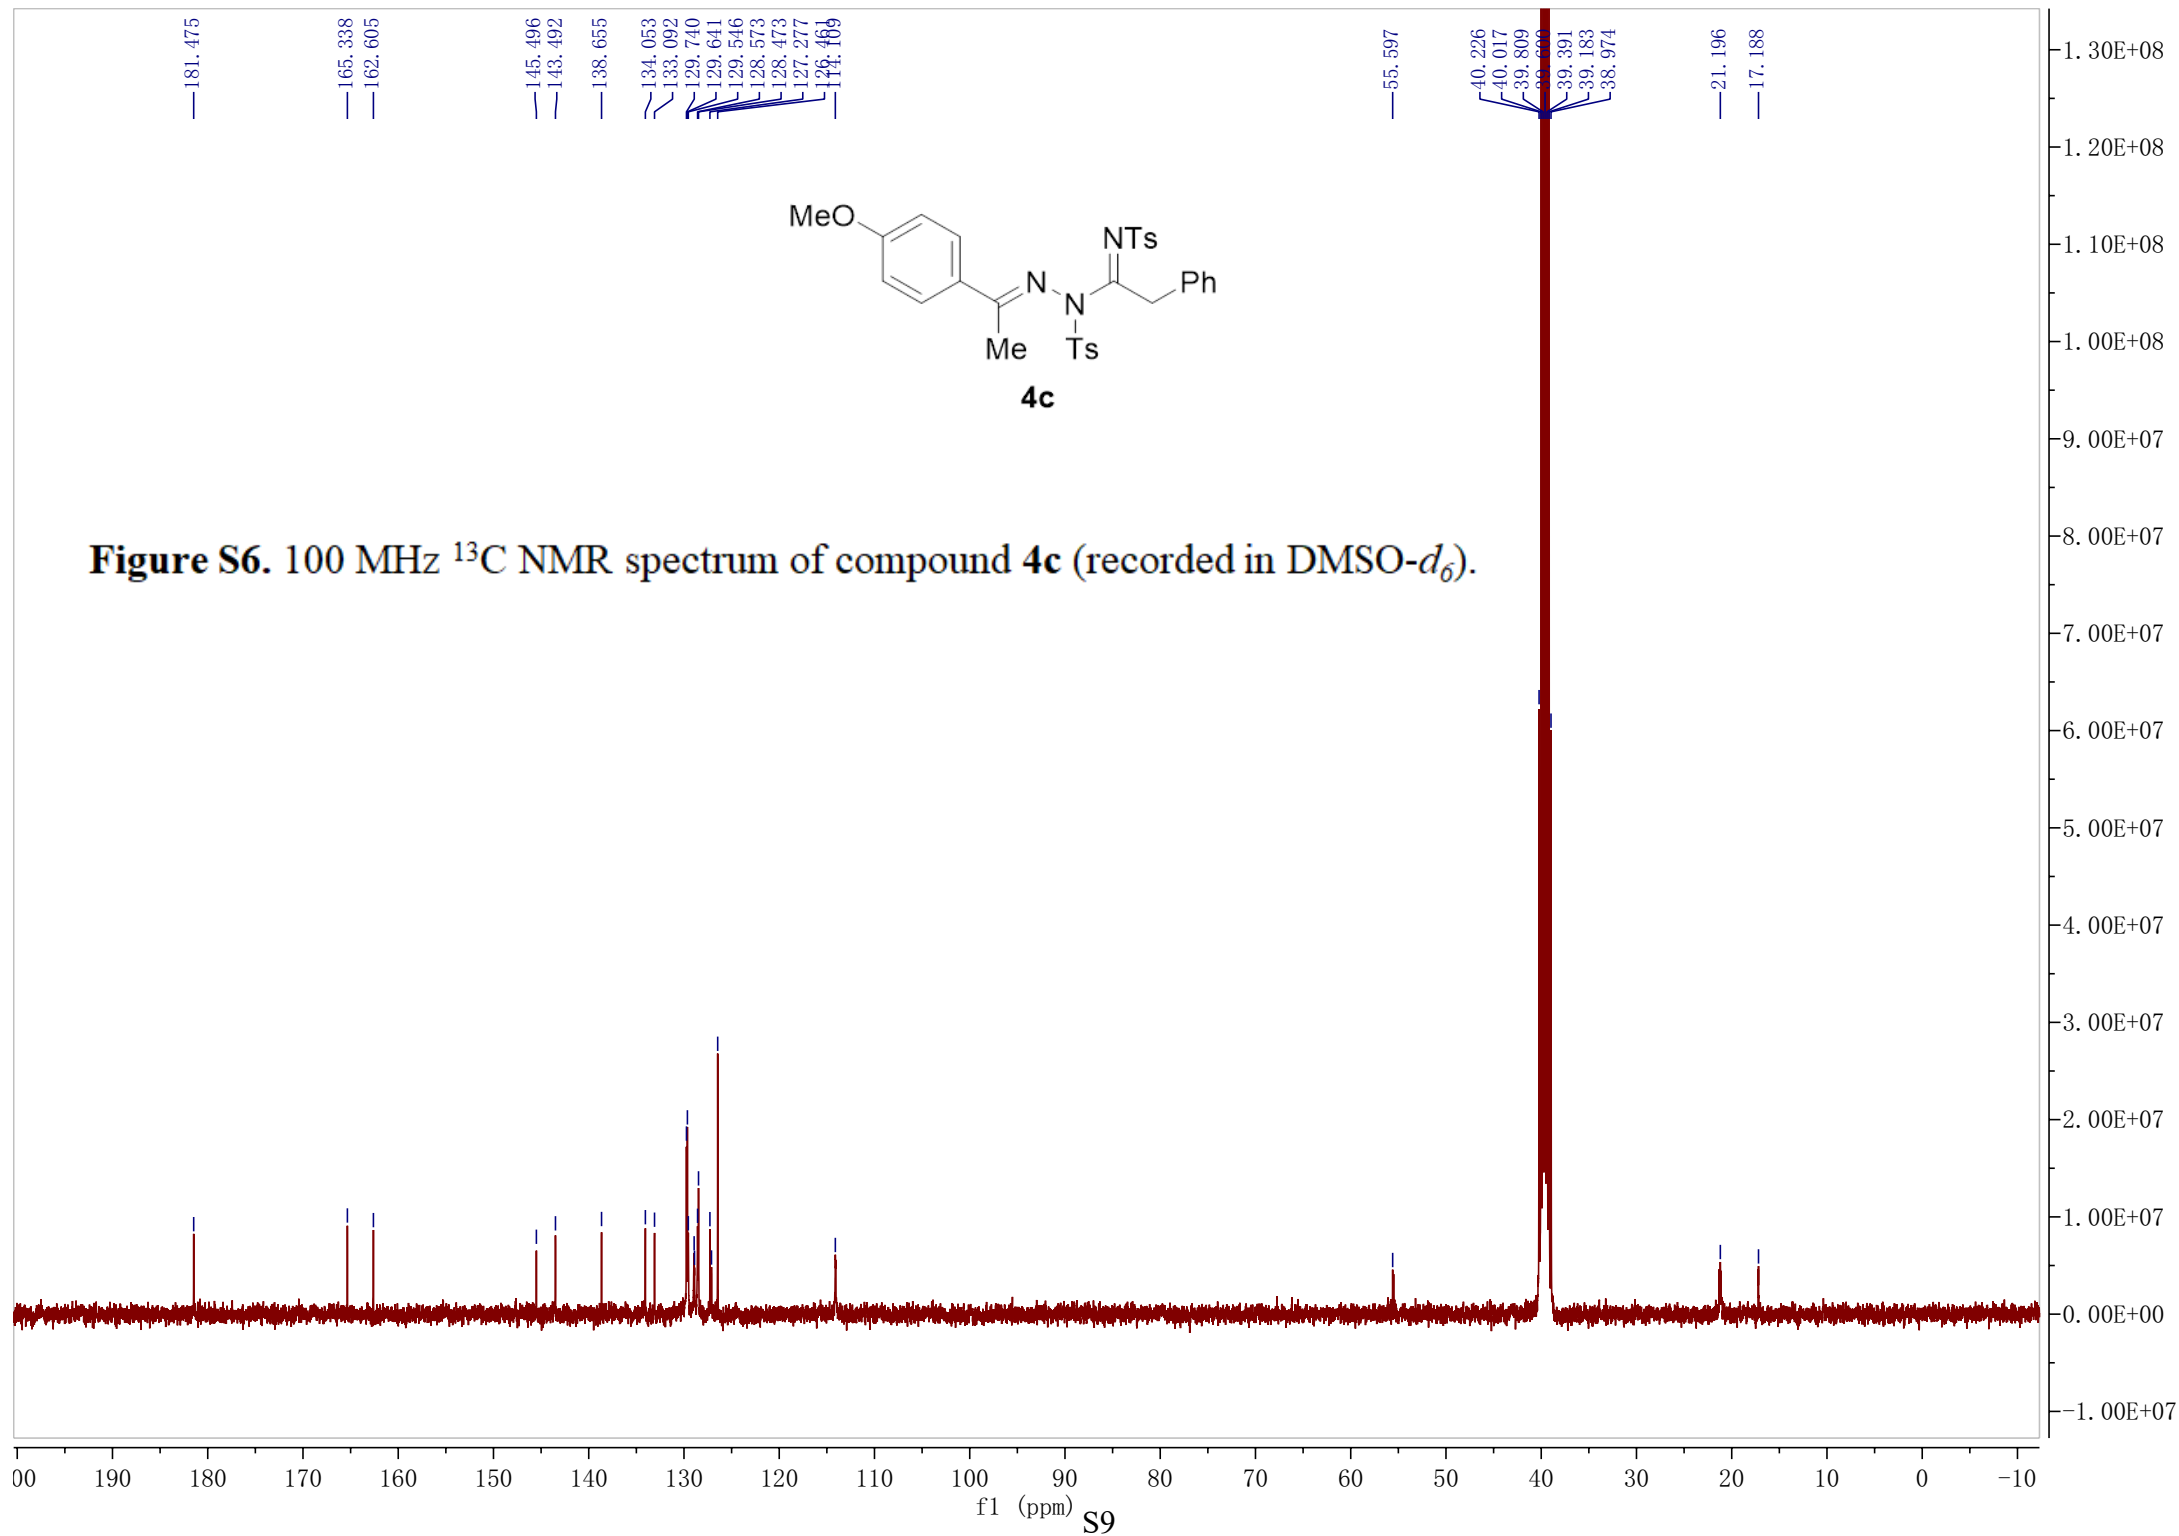

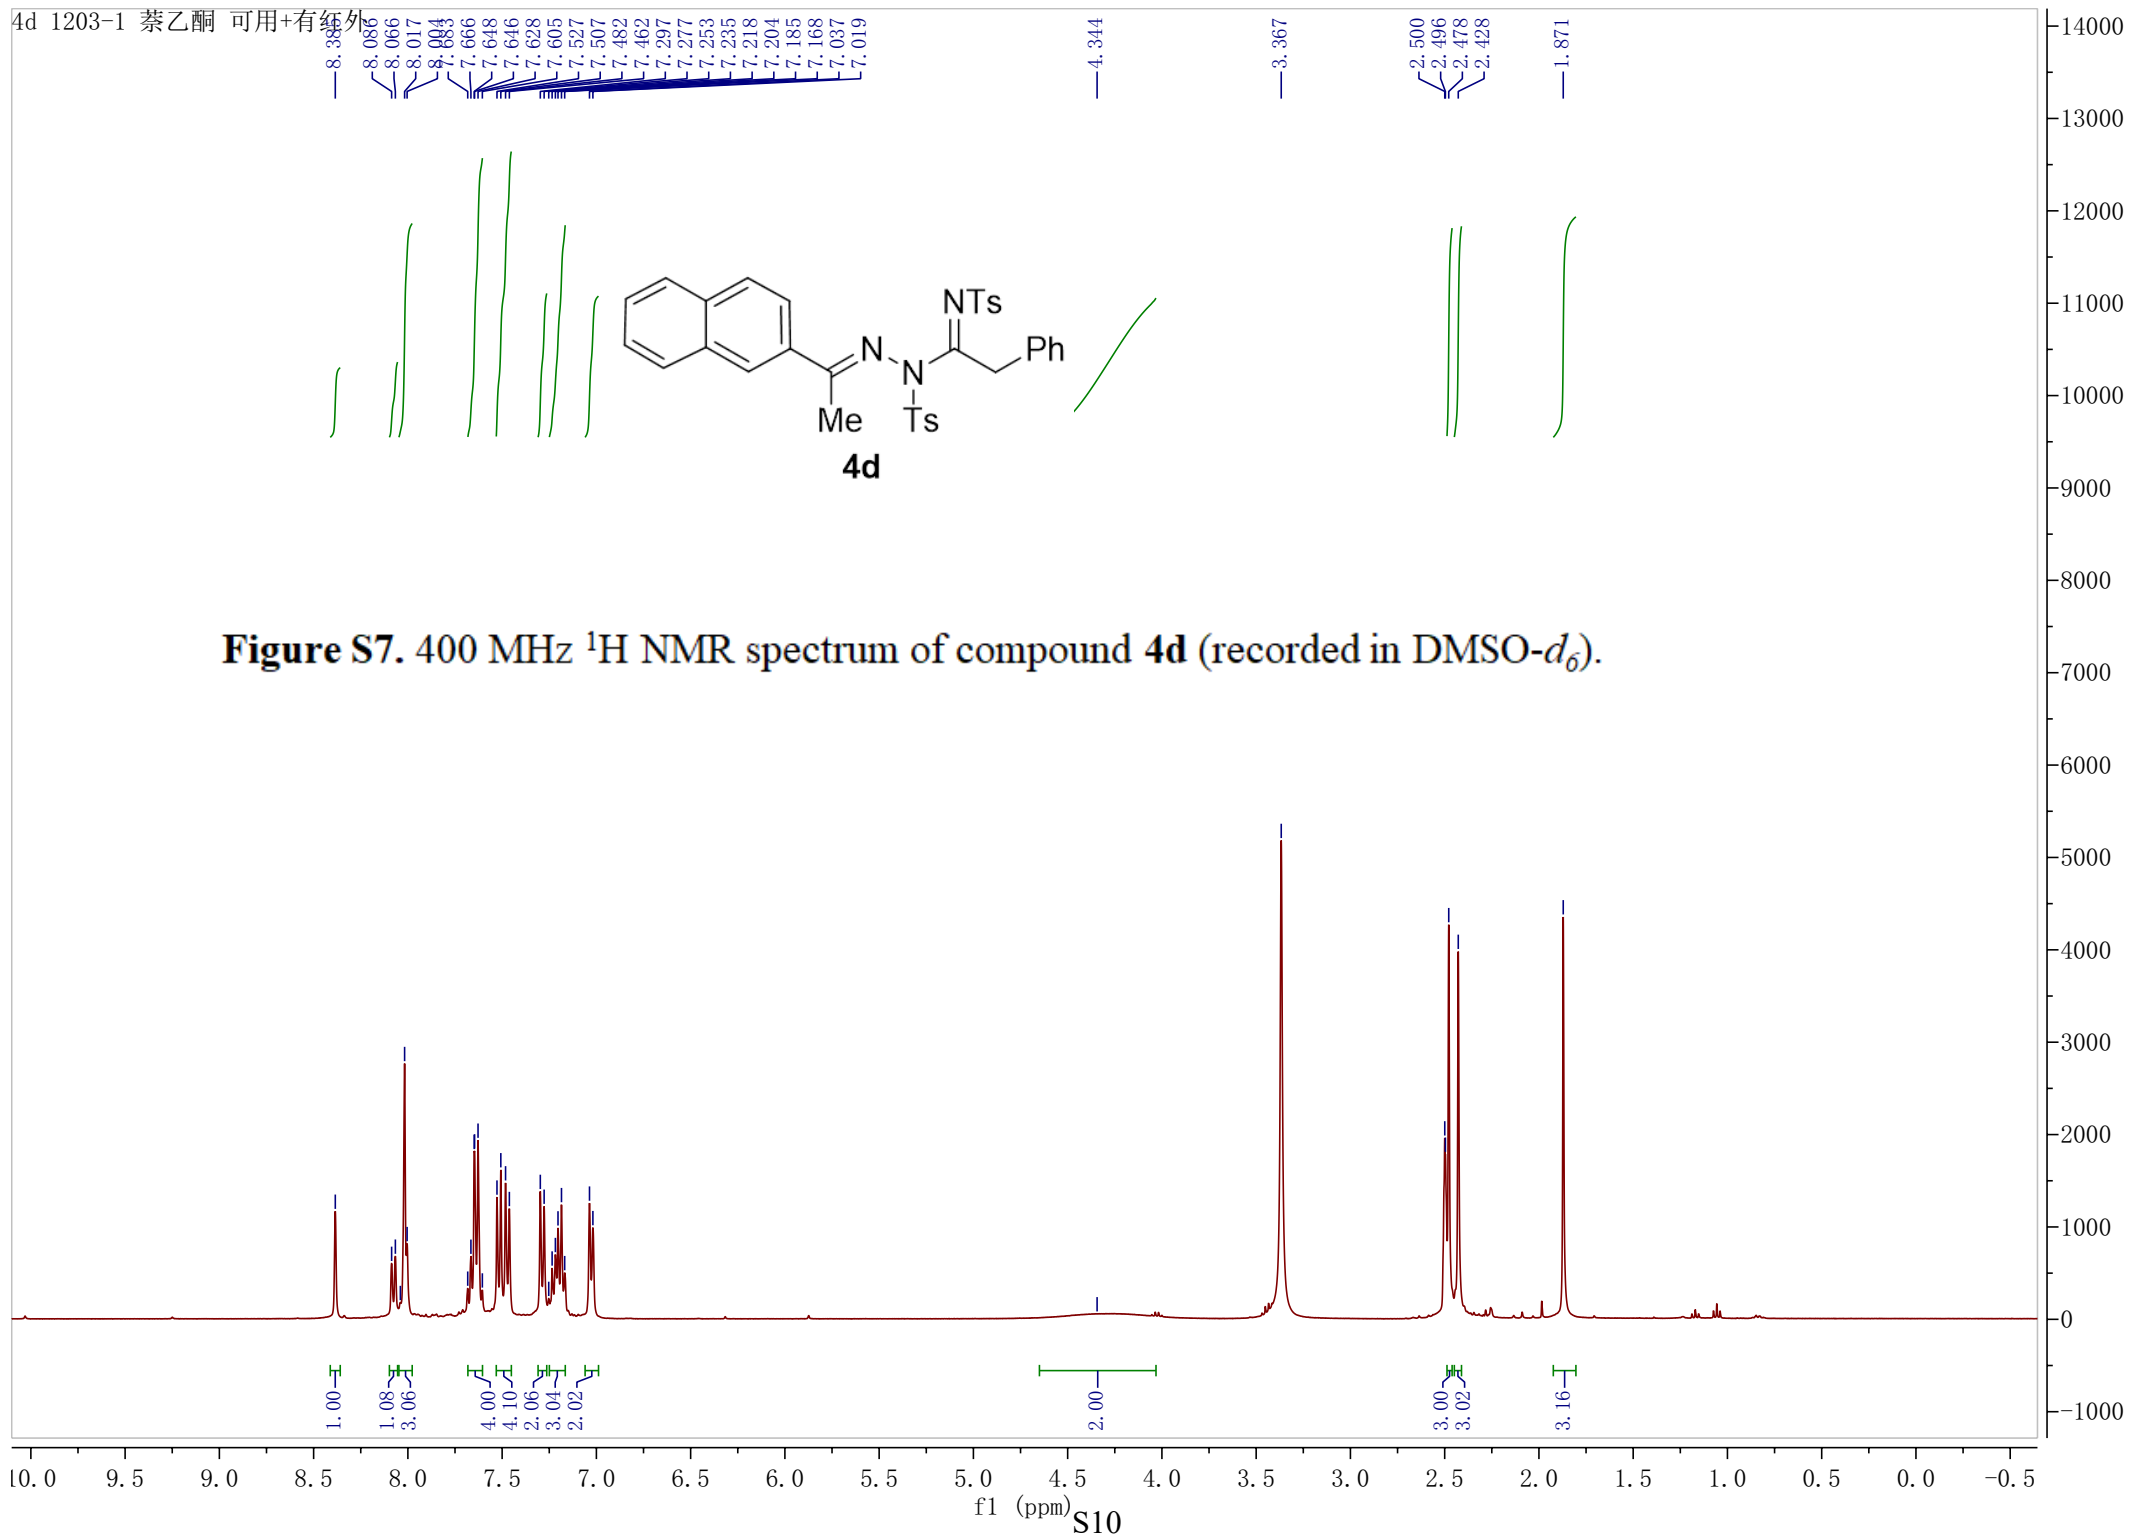

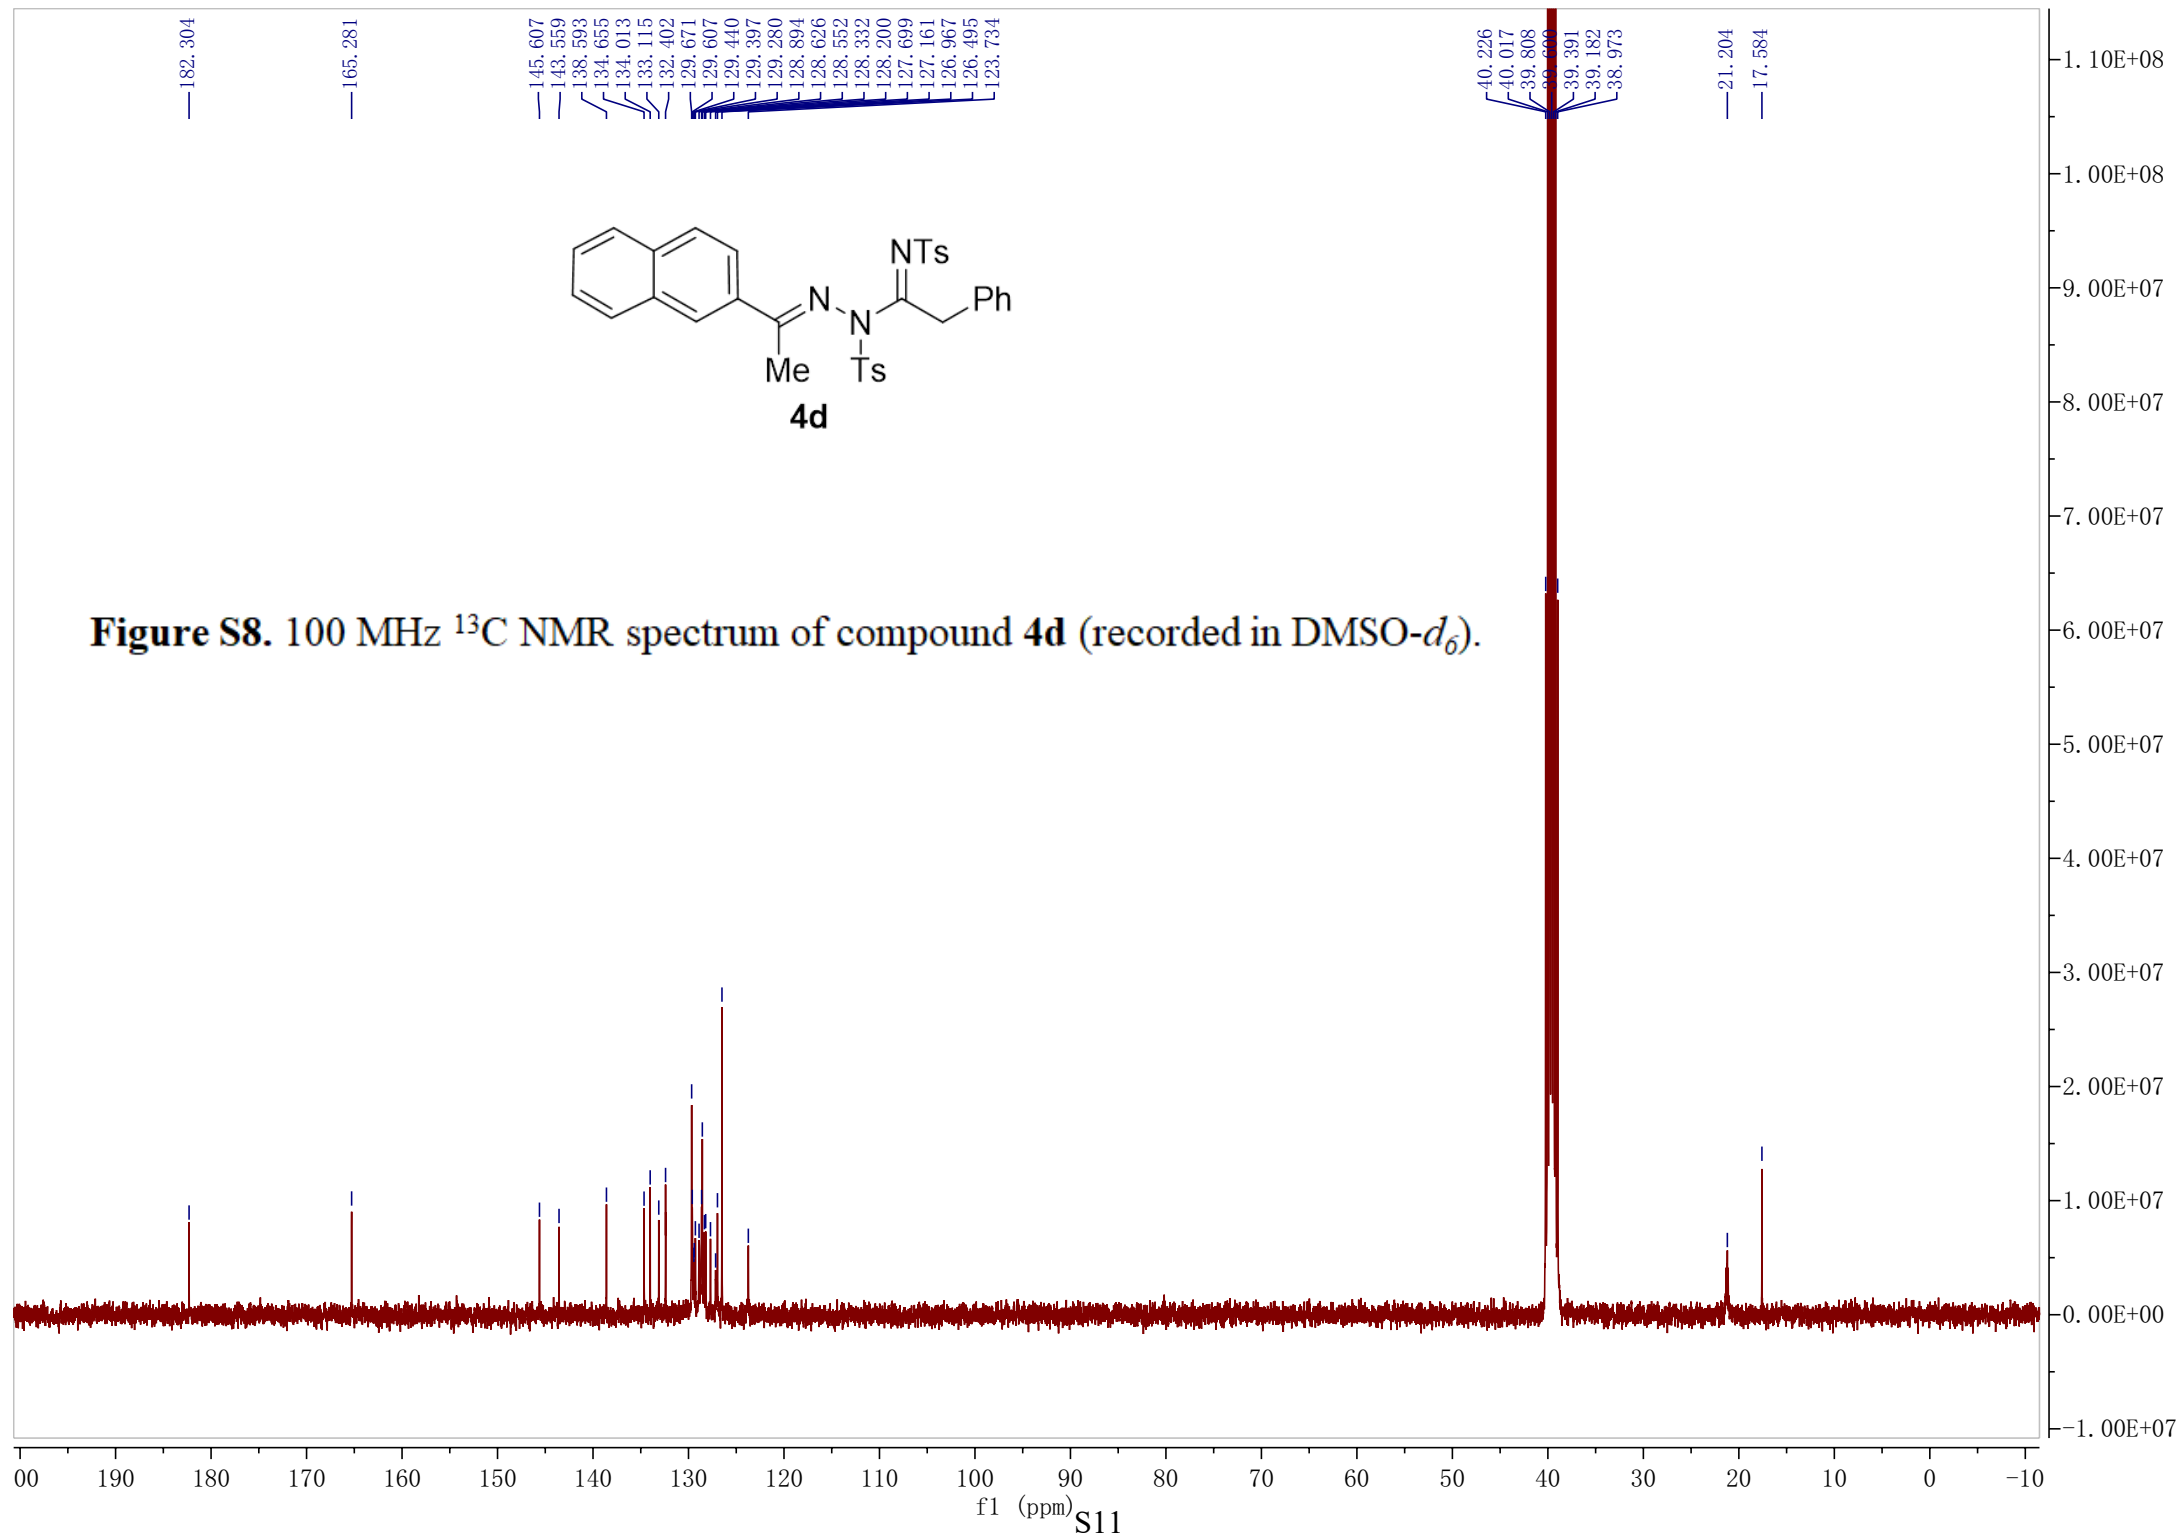

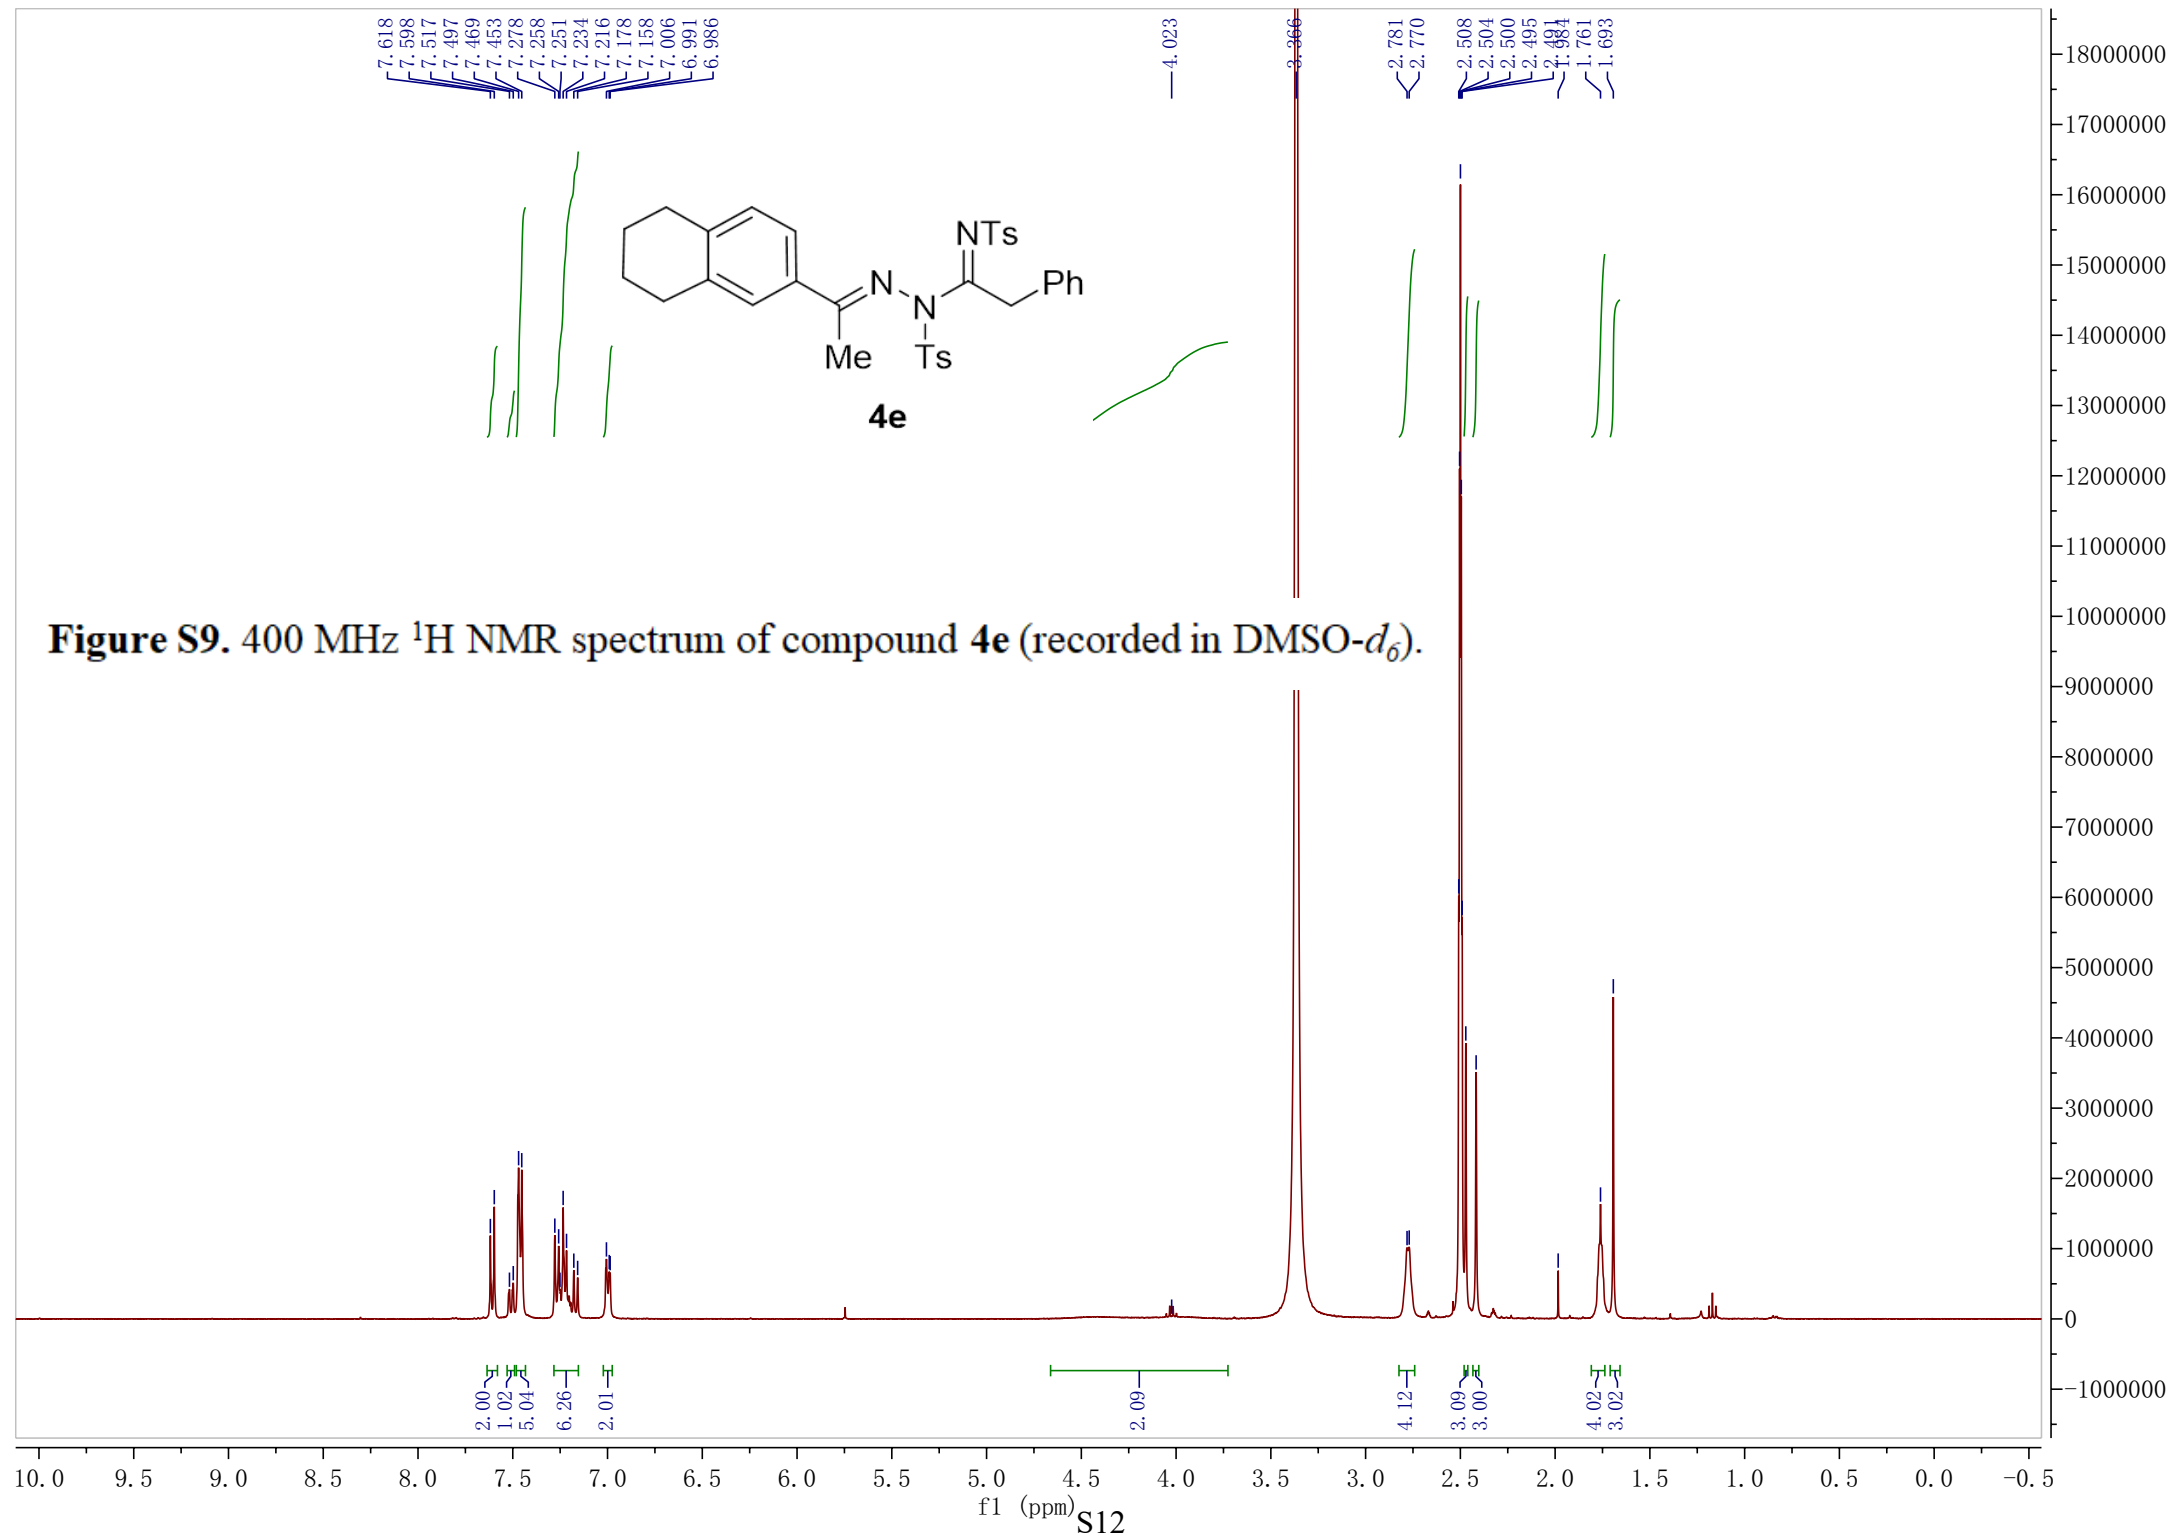

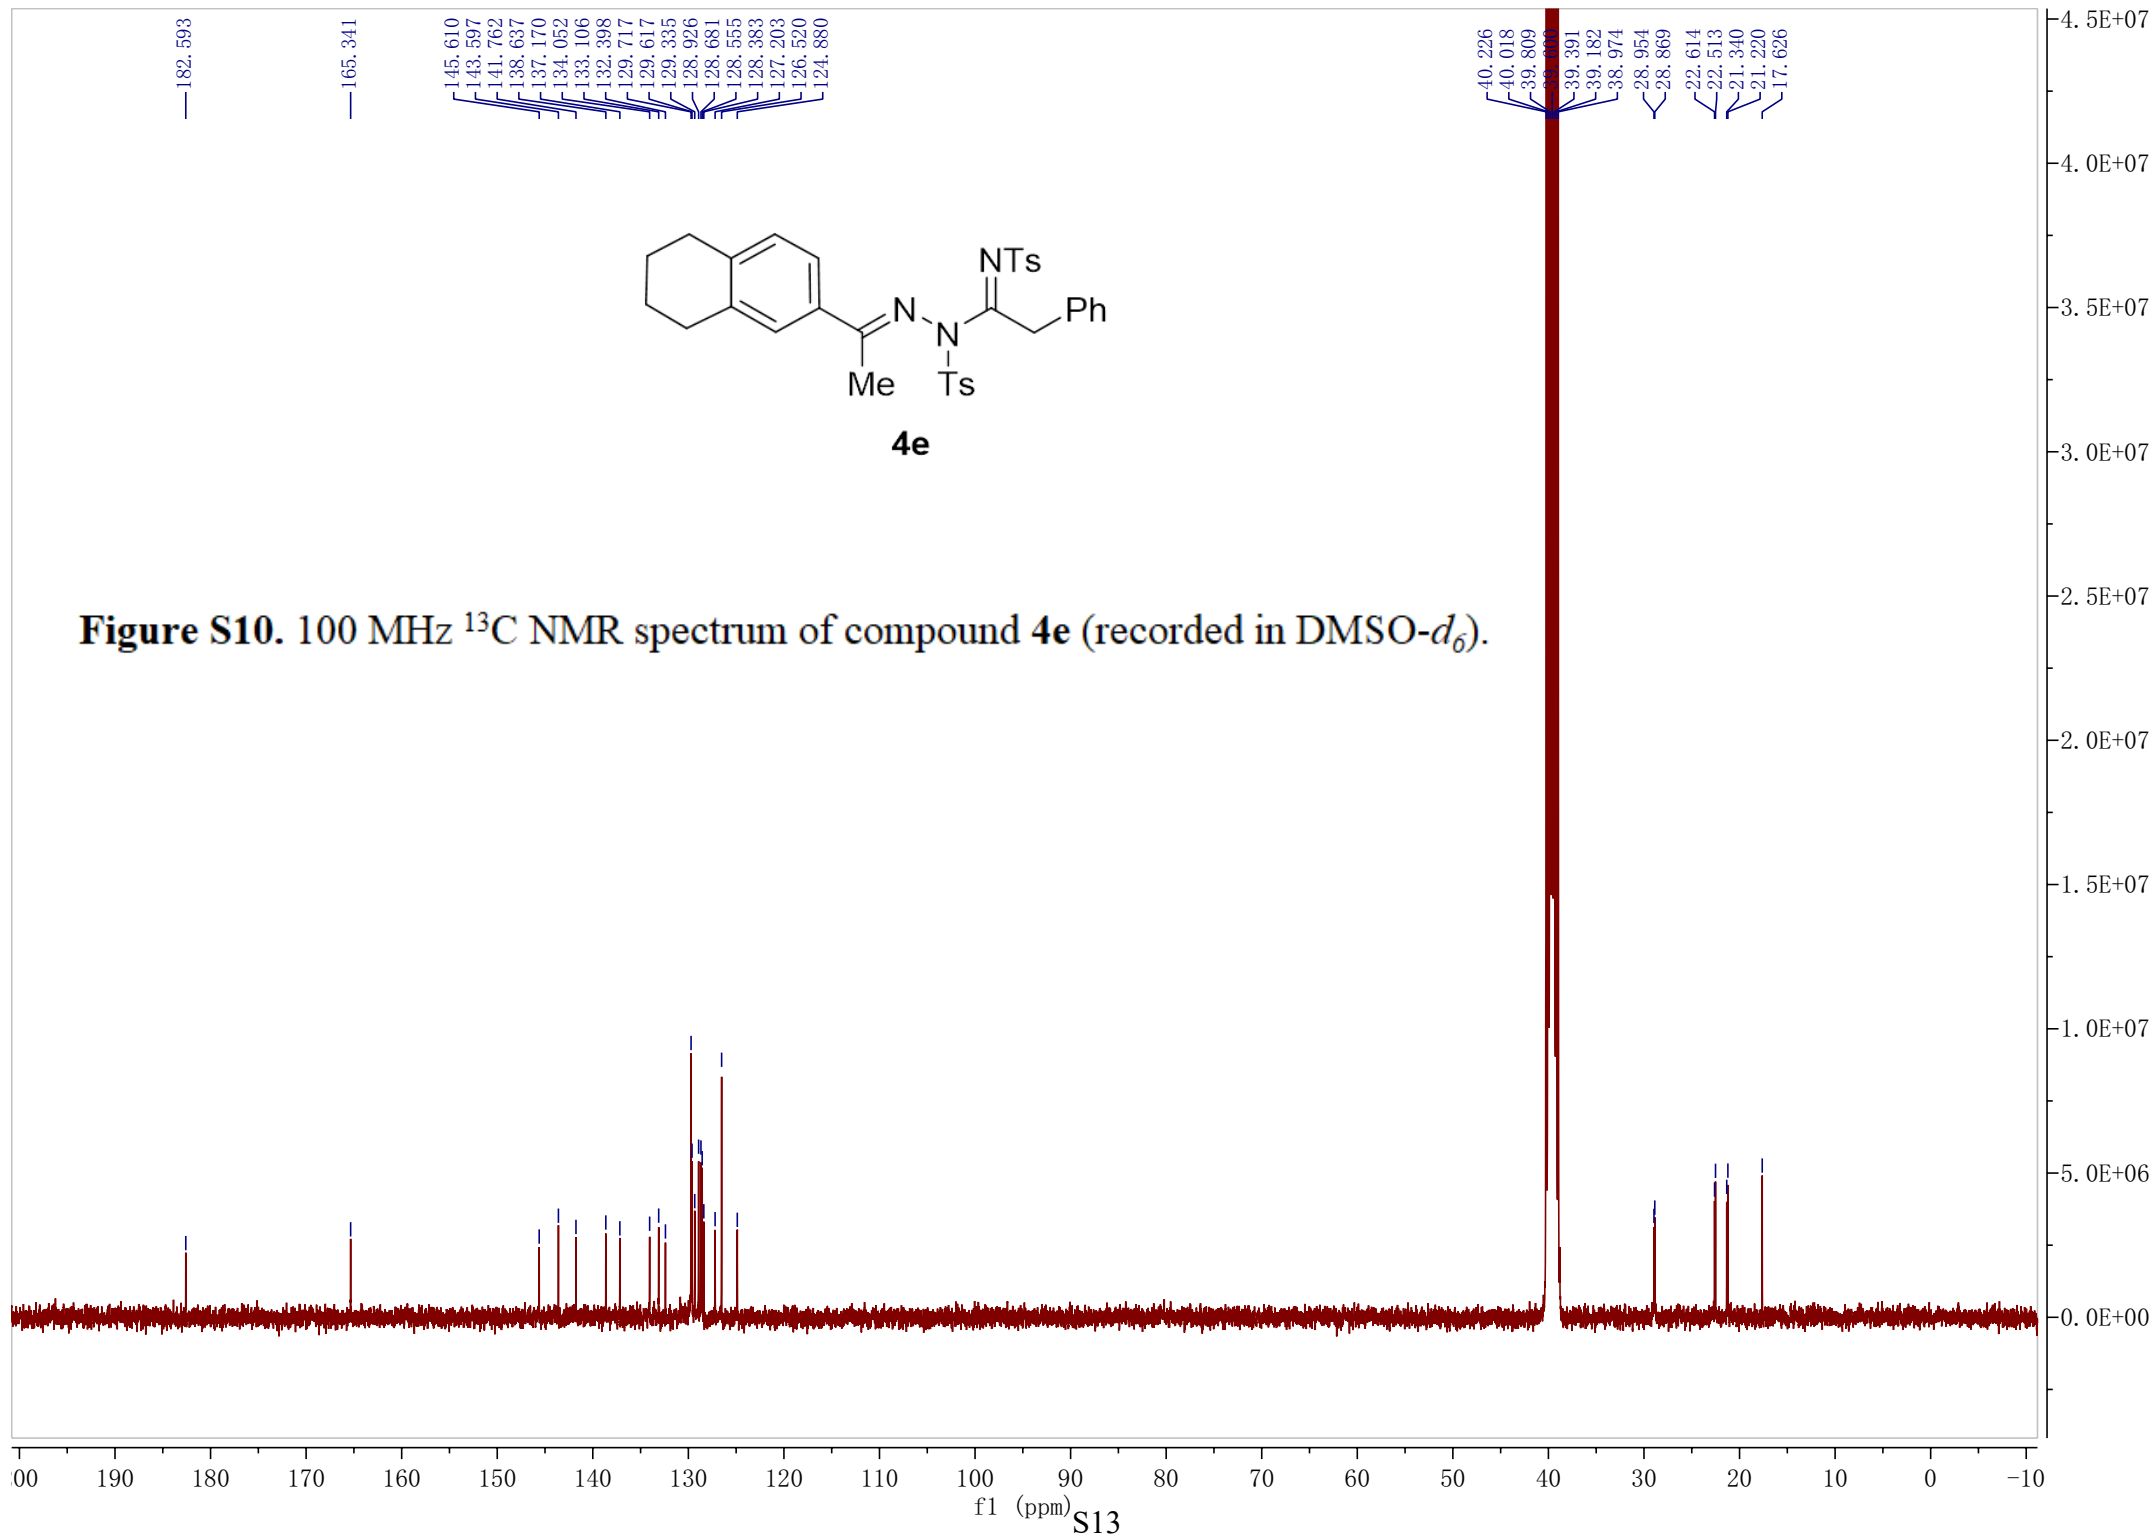

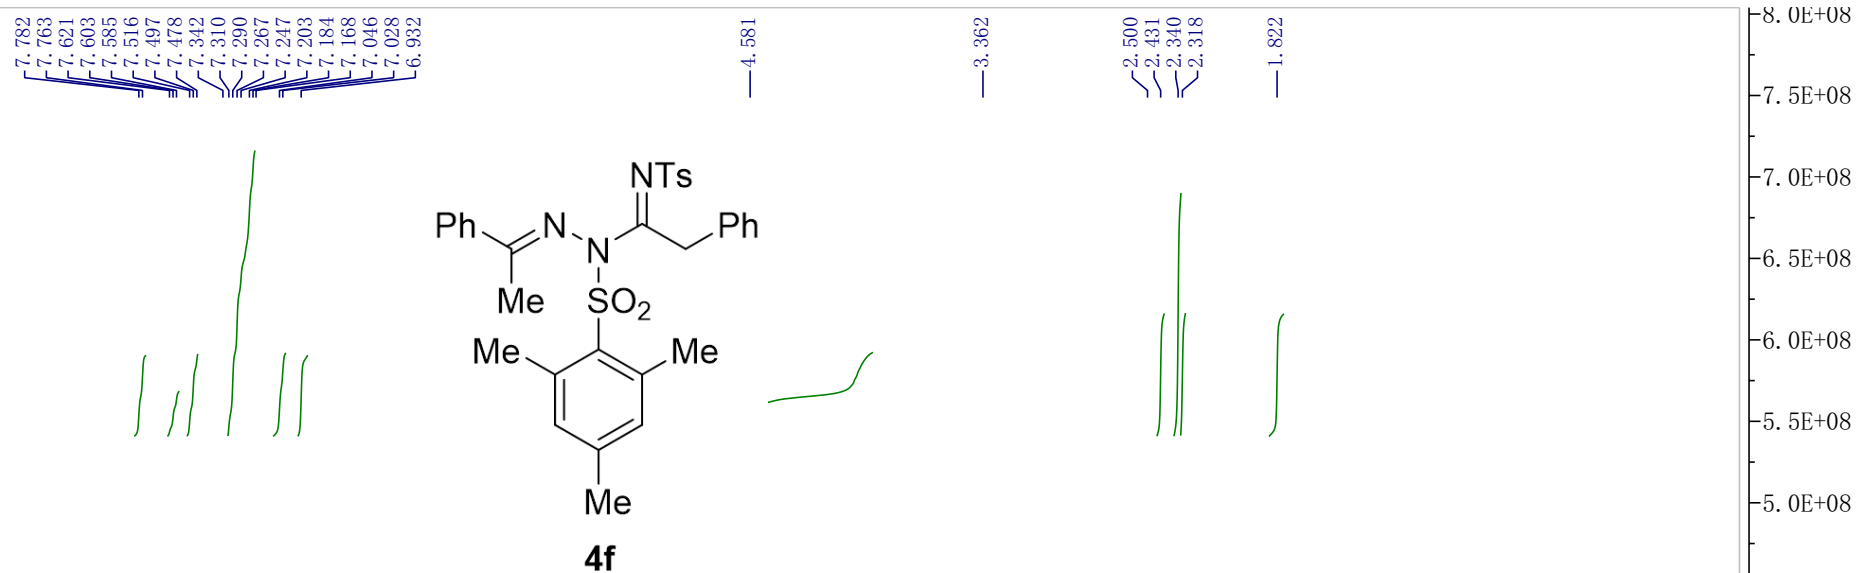

**Figure S11.** 400 MHz  $^1\text{H}$  NMR spectrum of compound **4f** (recorded in DMSO- $d_6$ ).

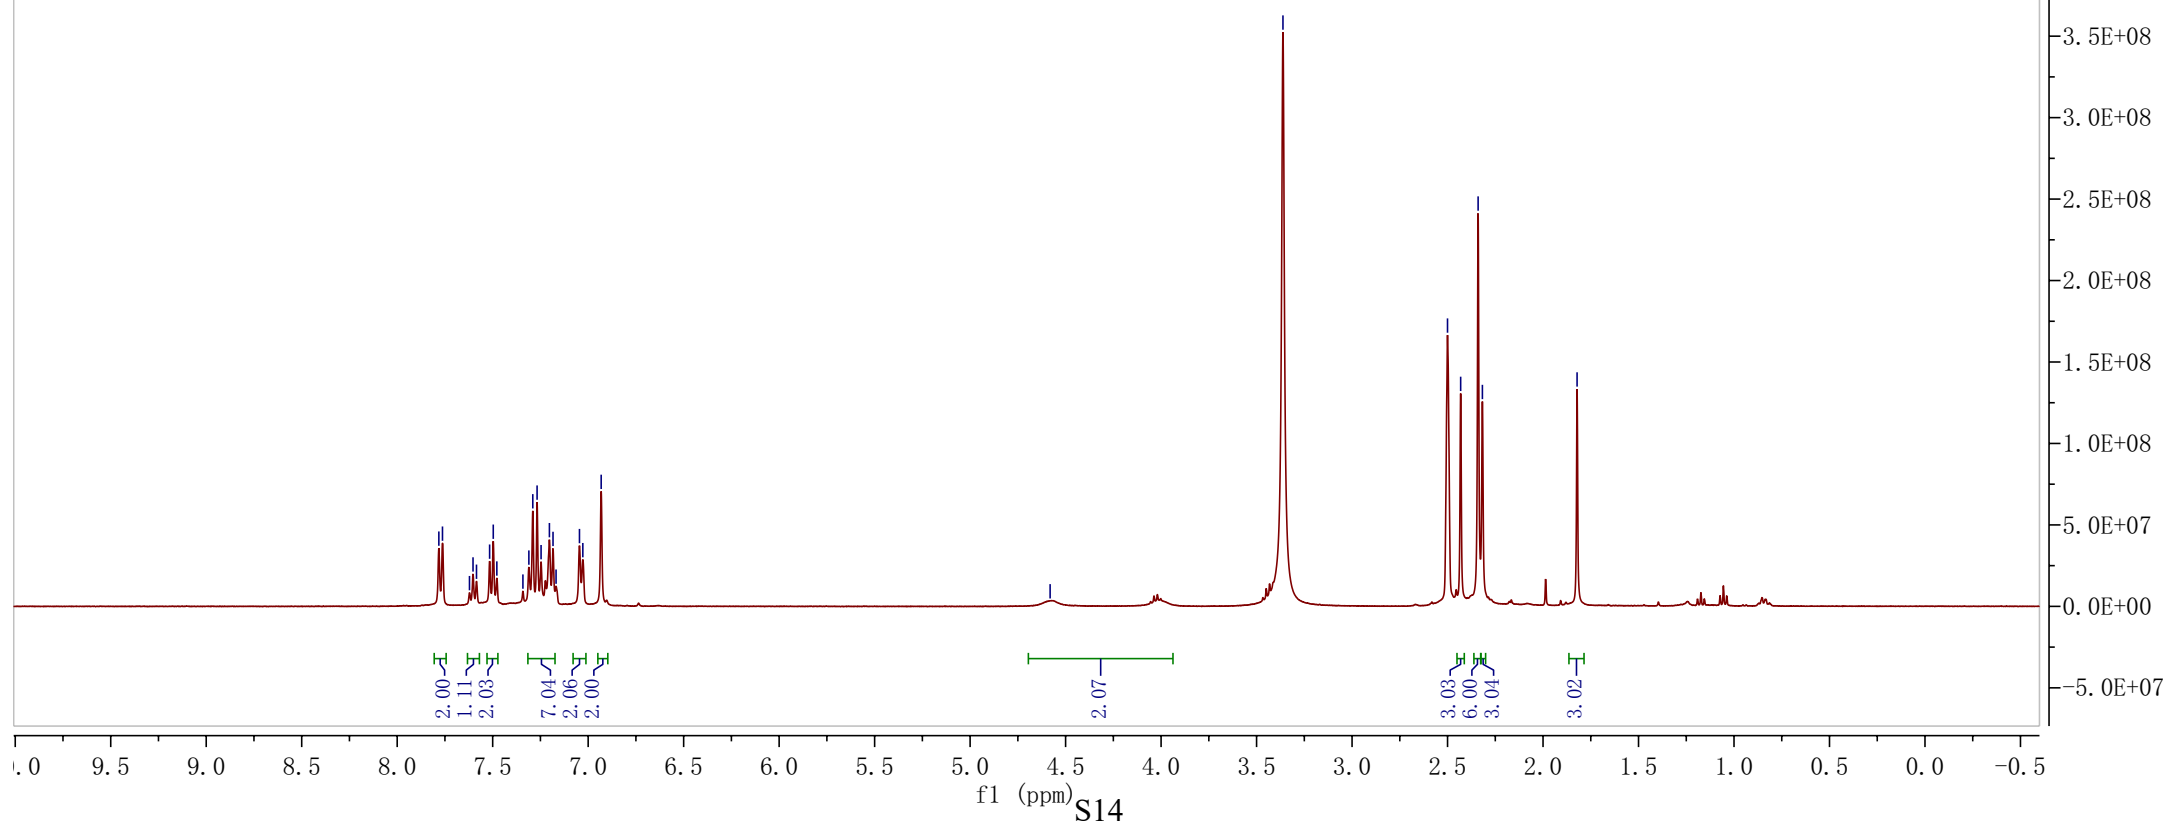

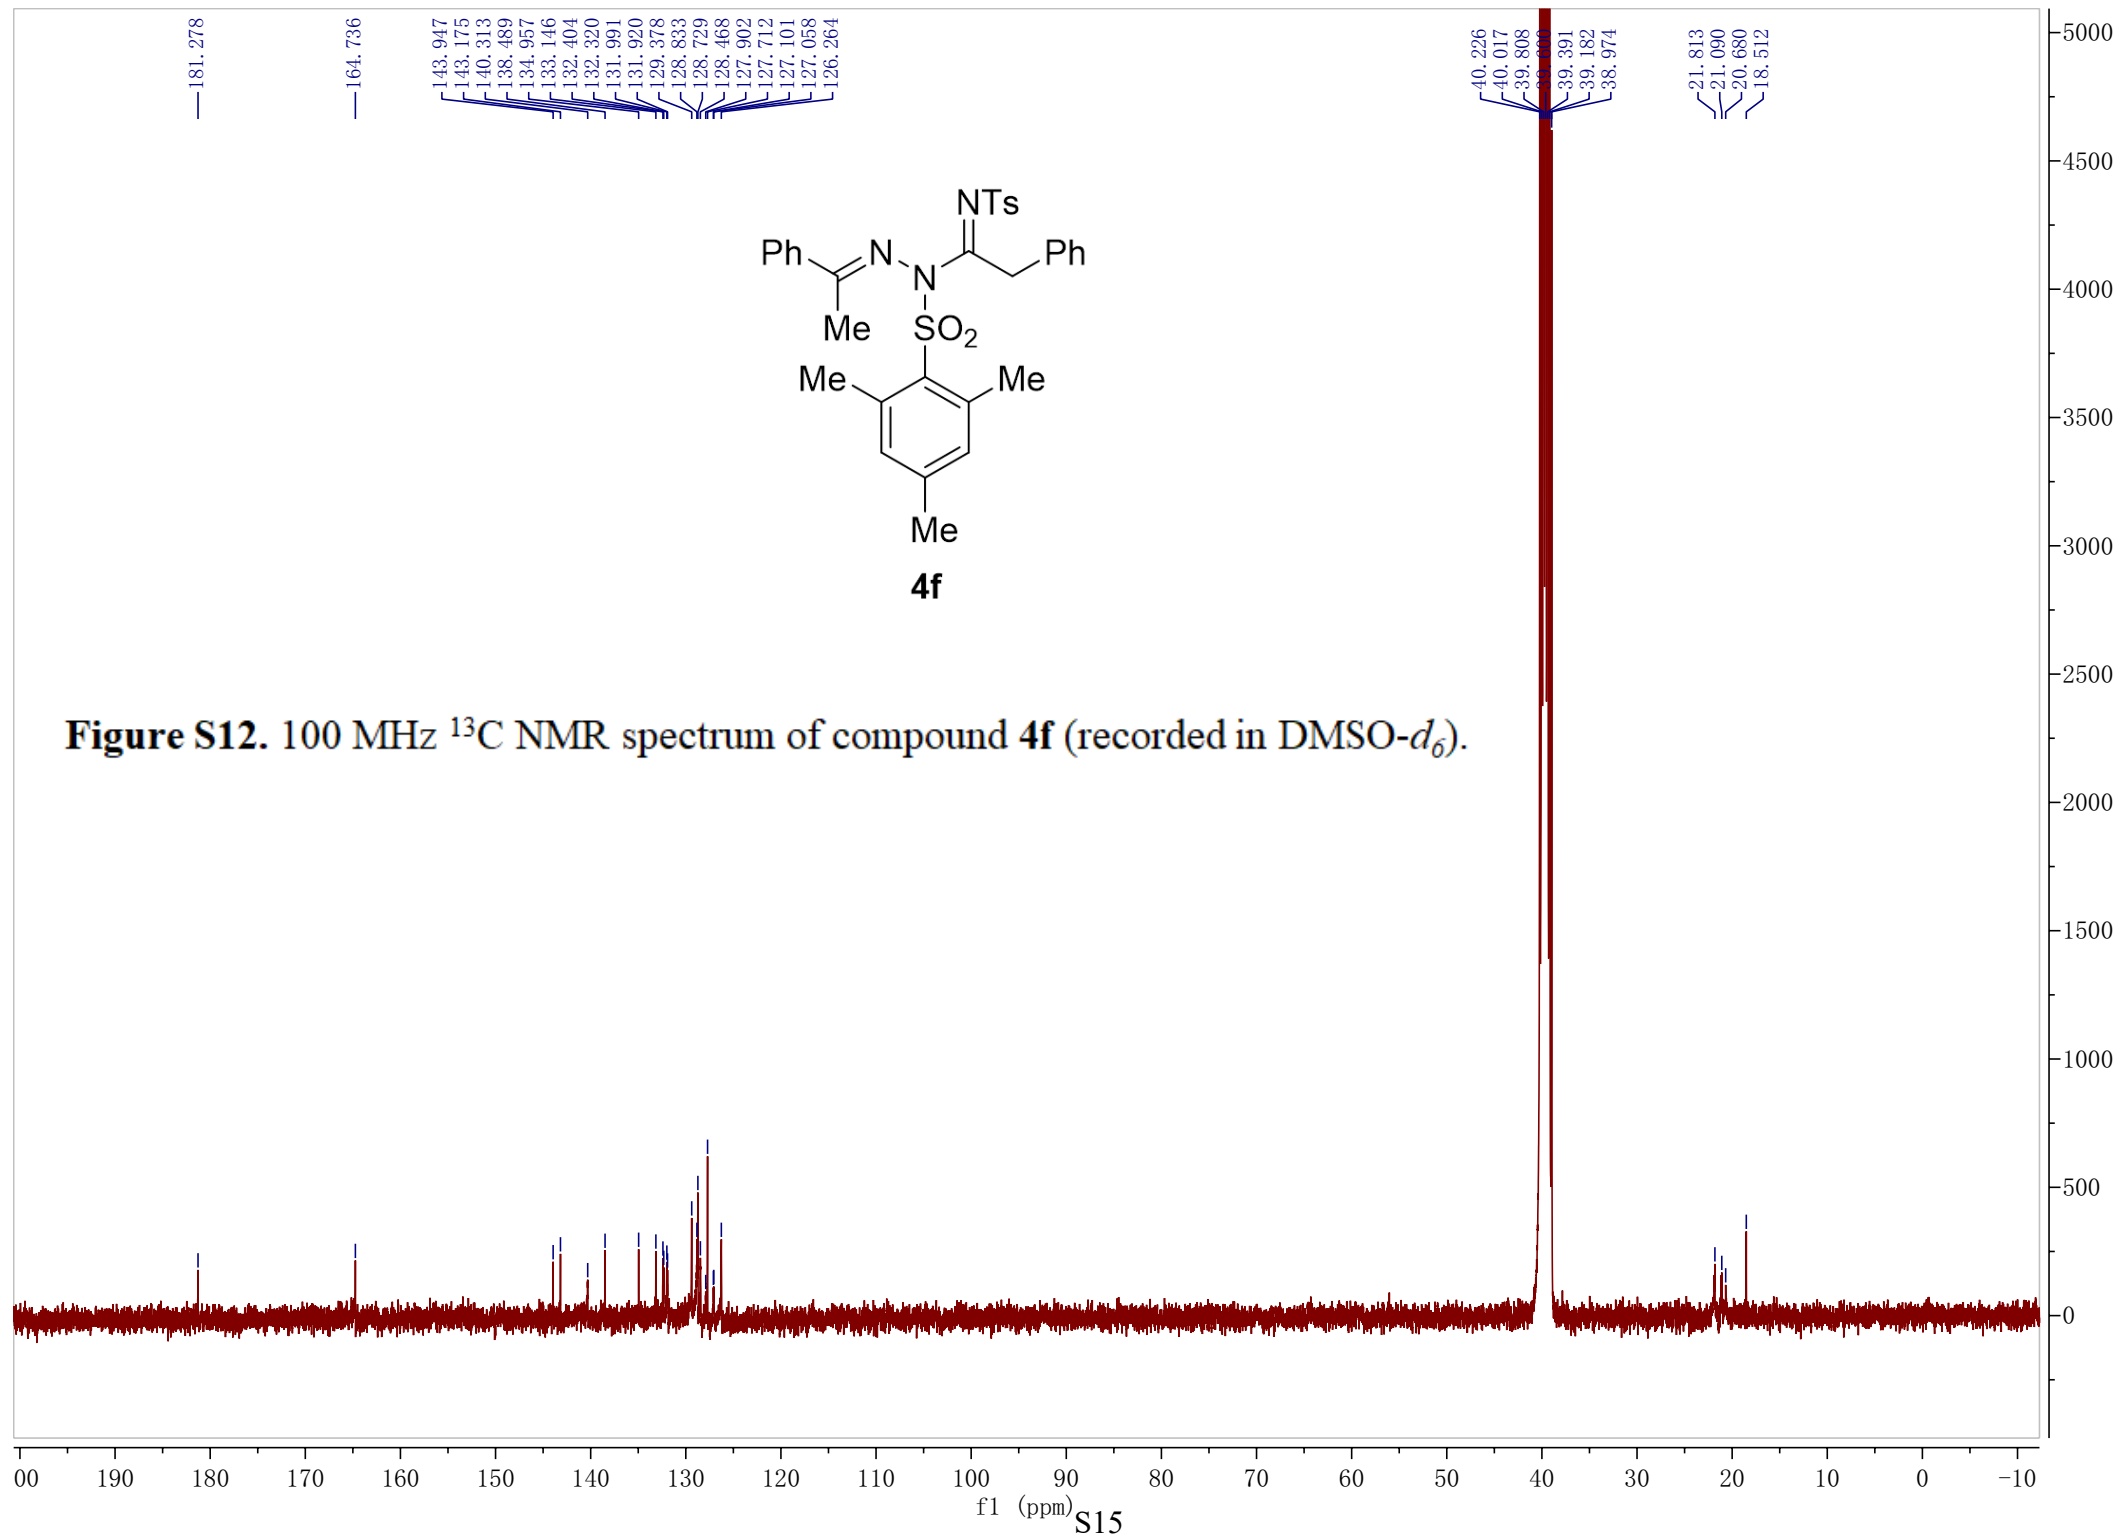

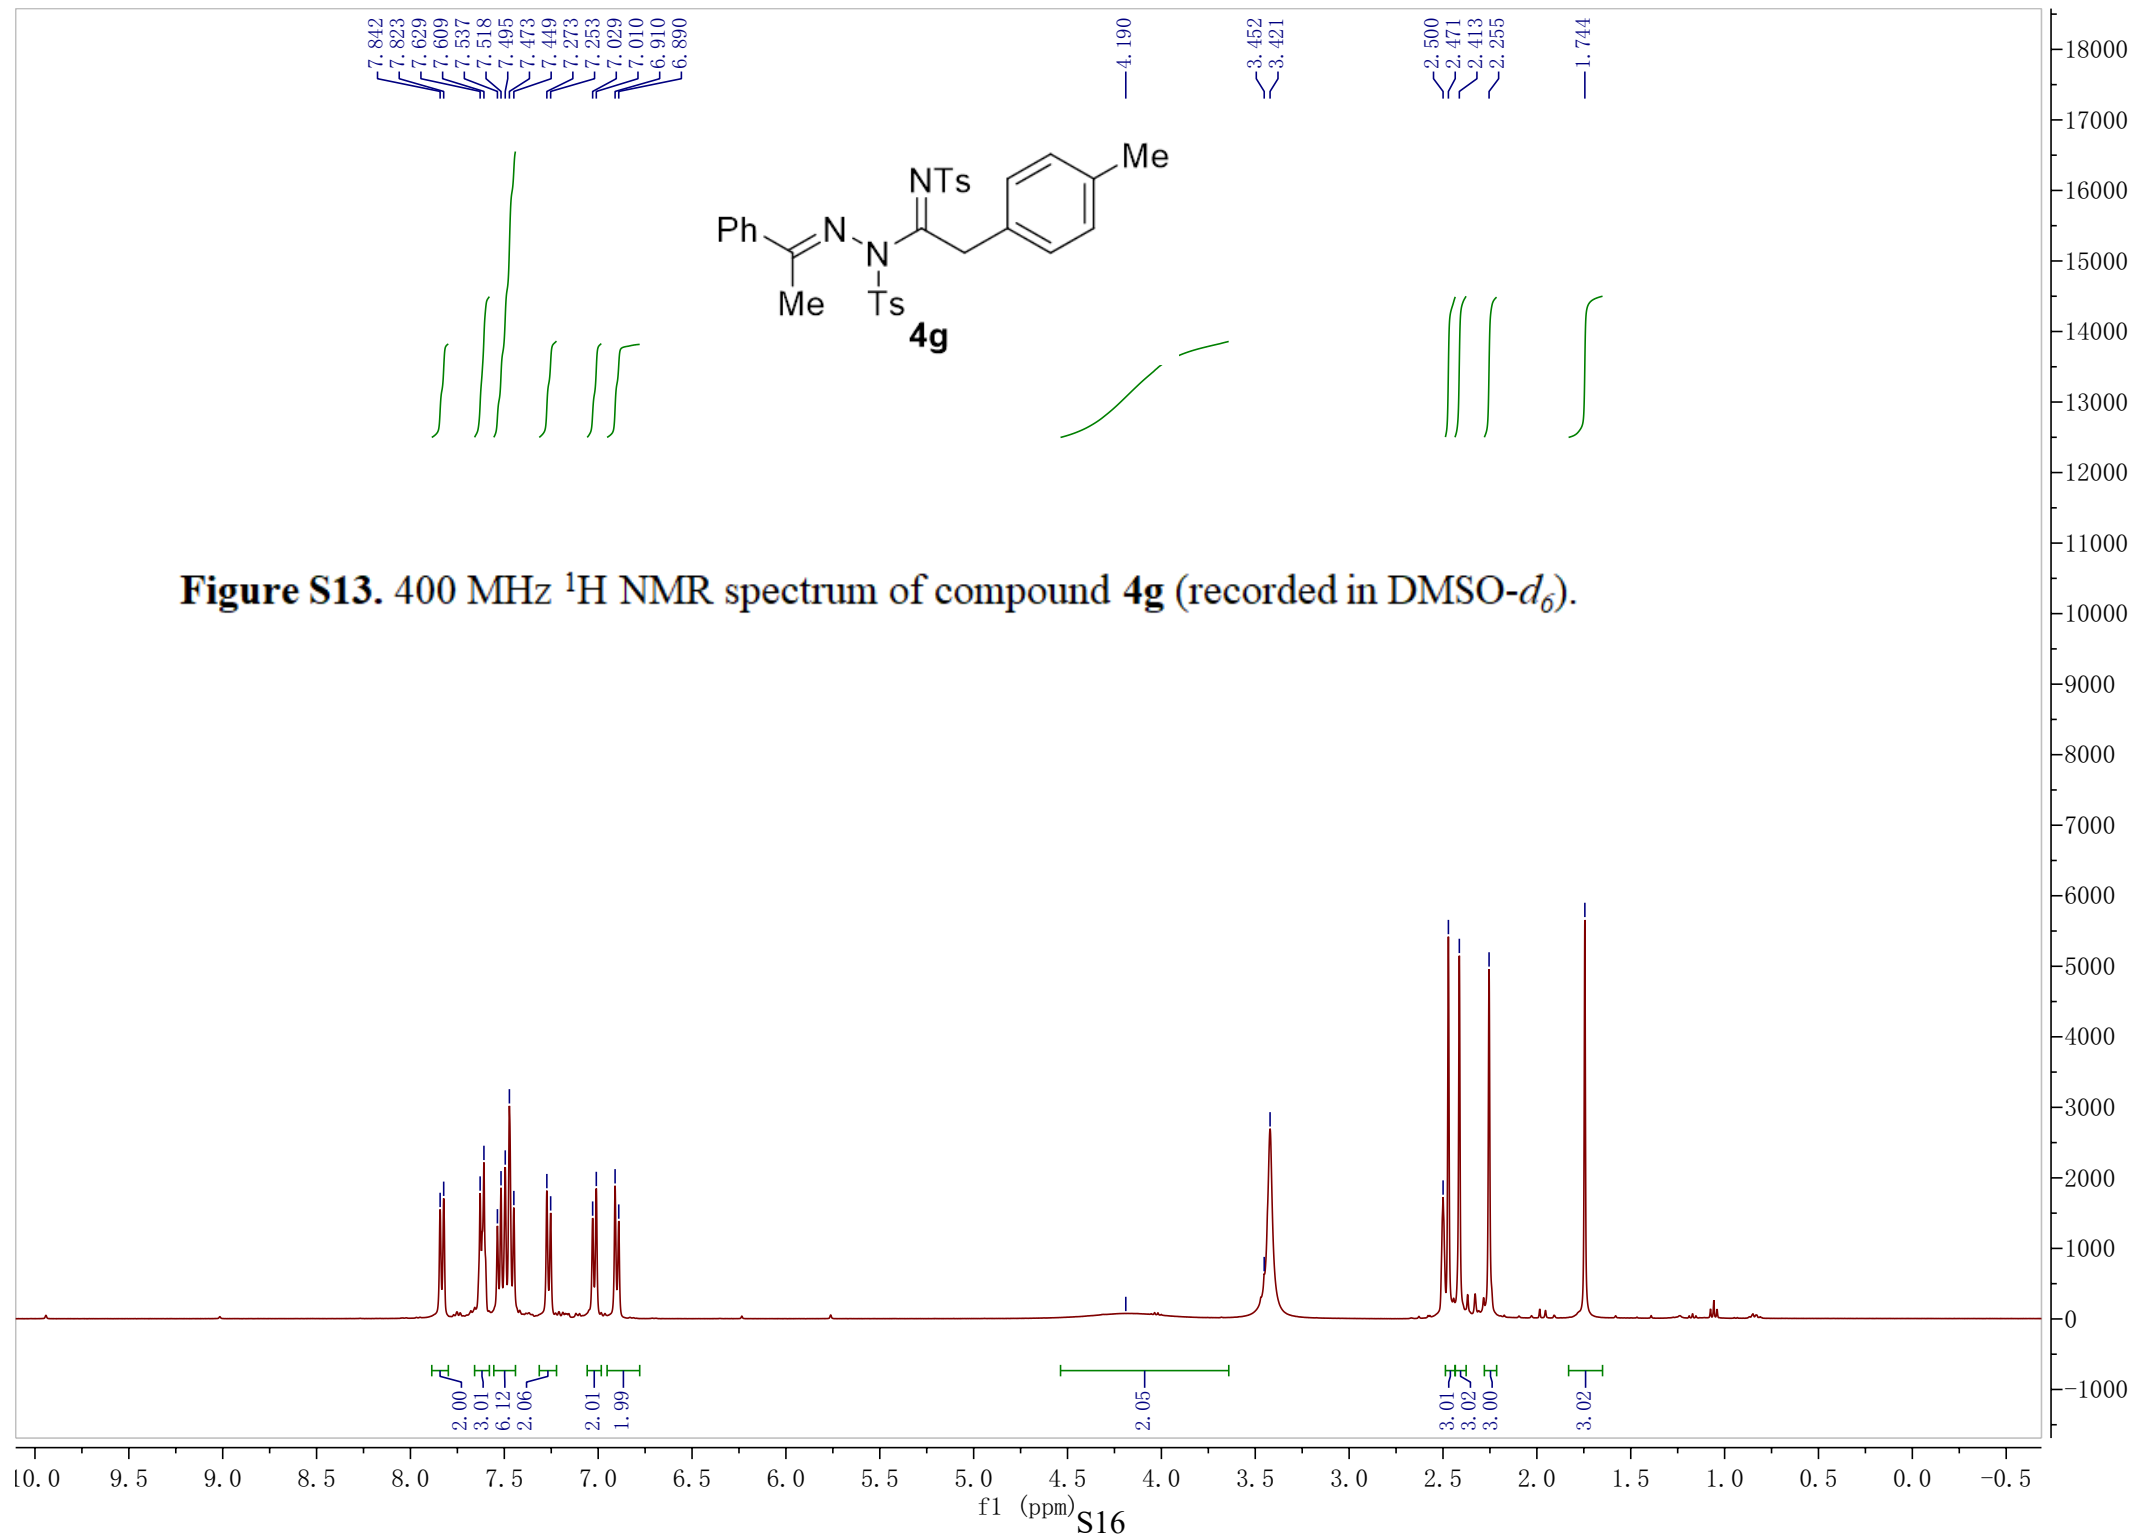



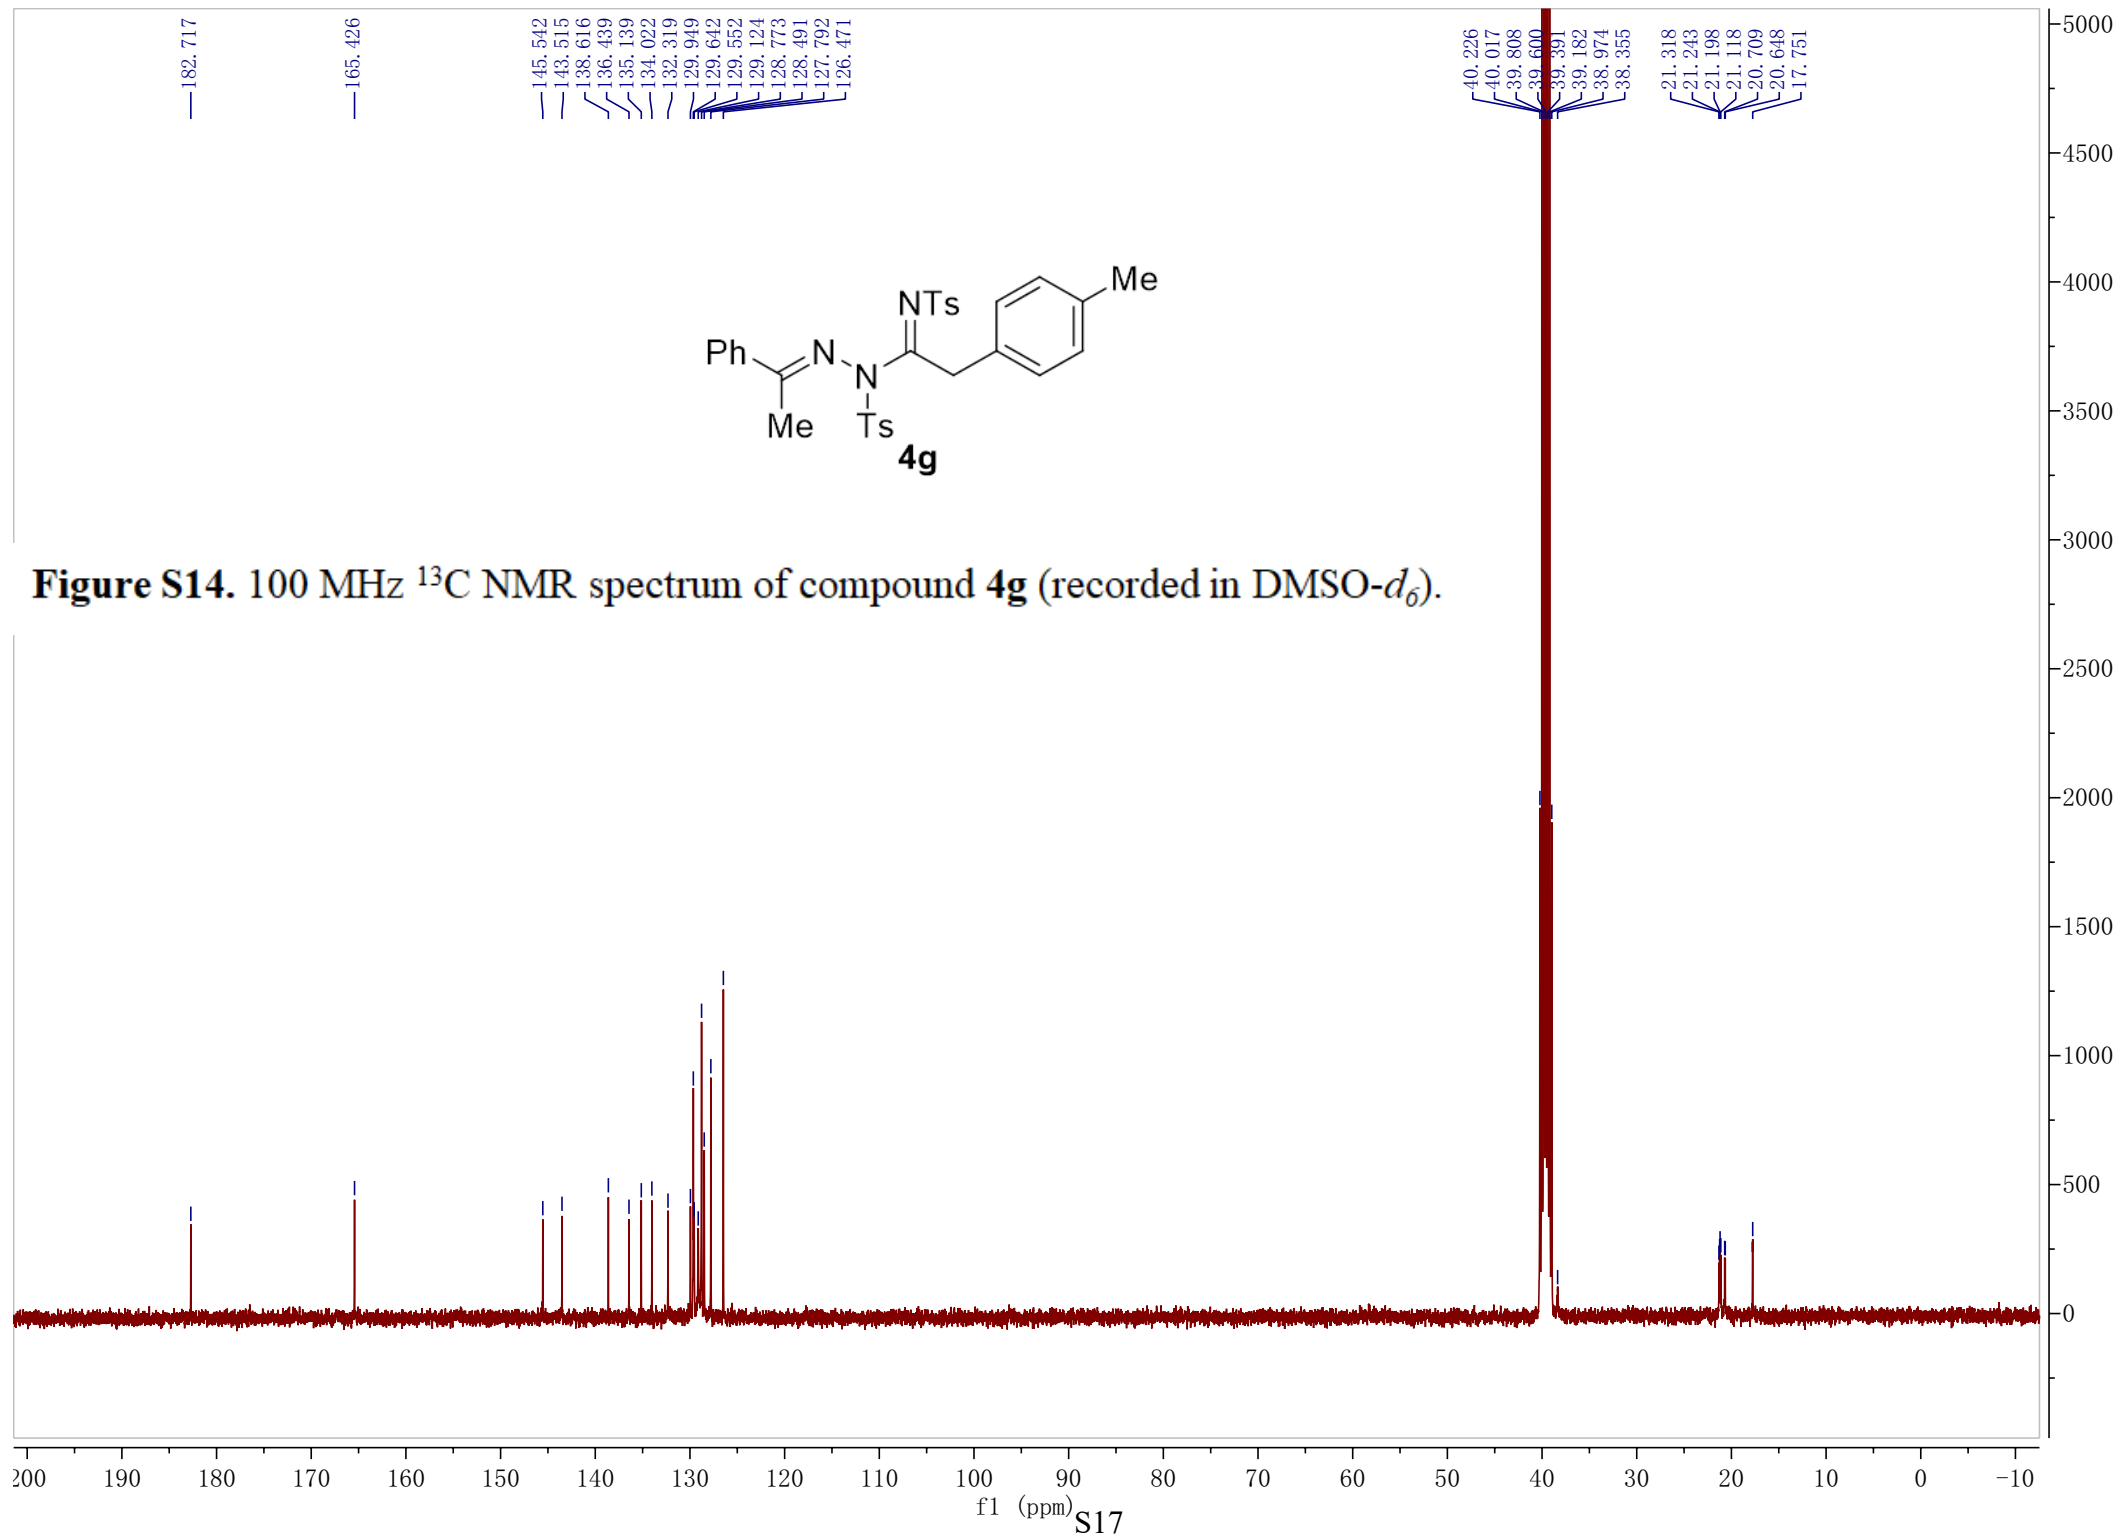

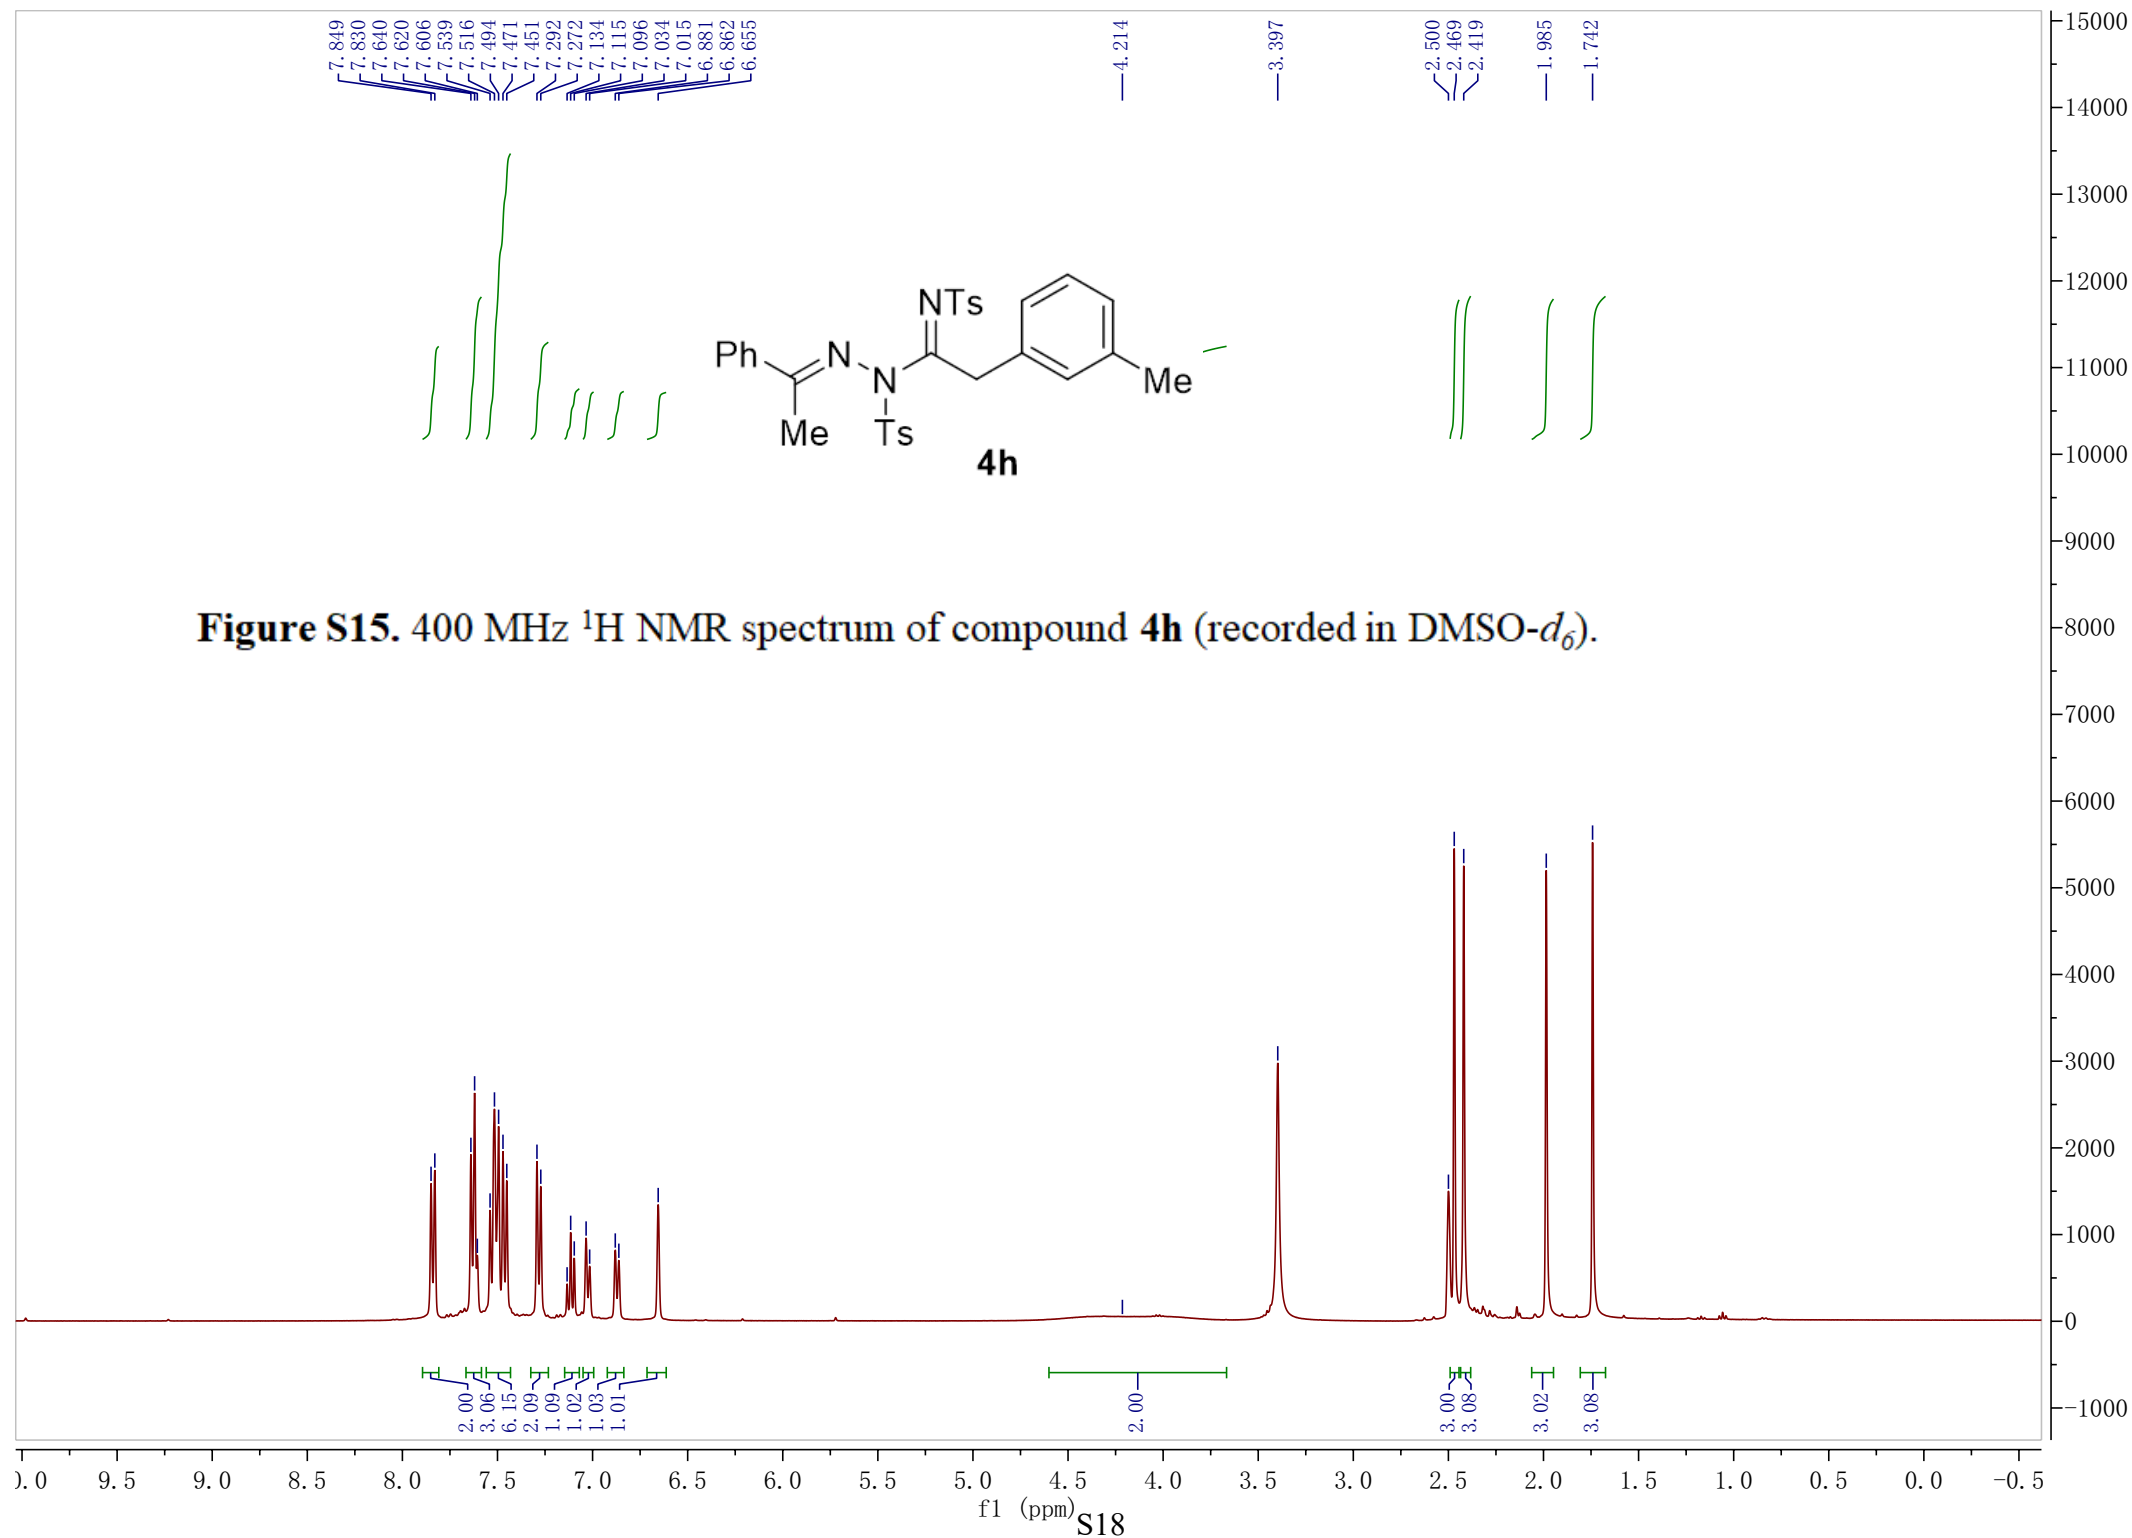

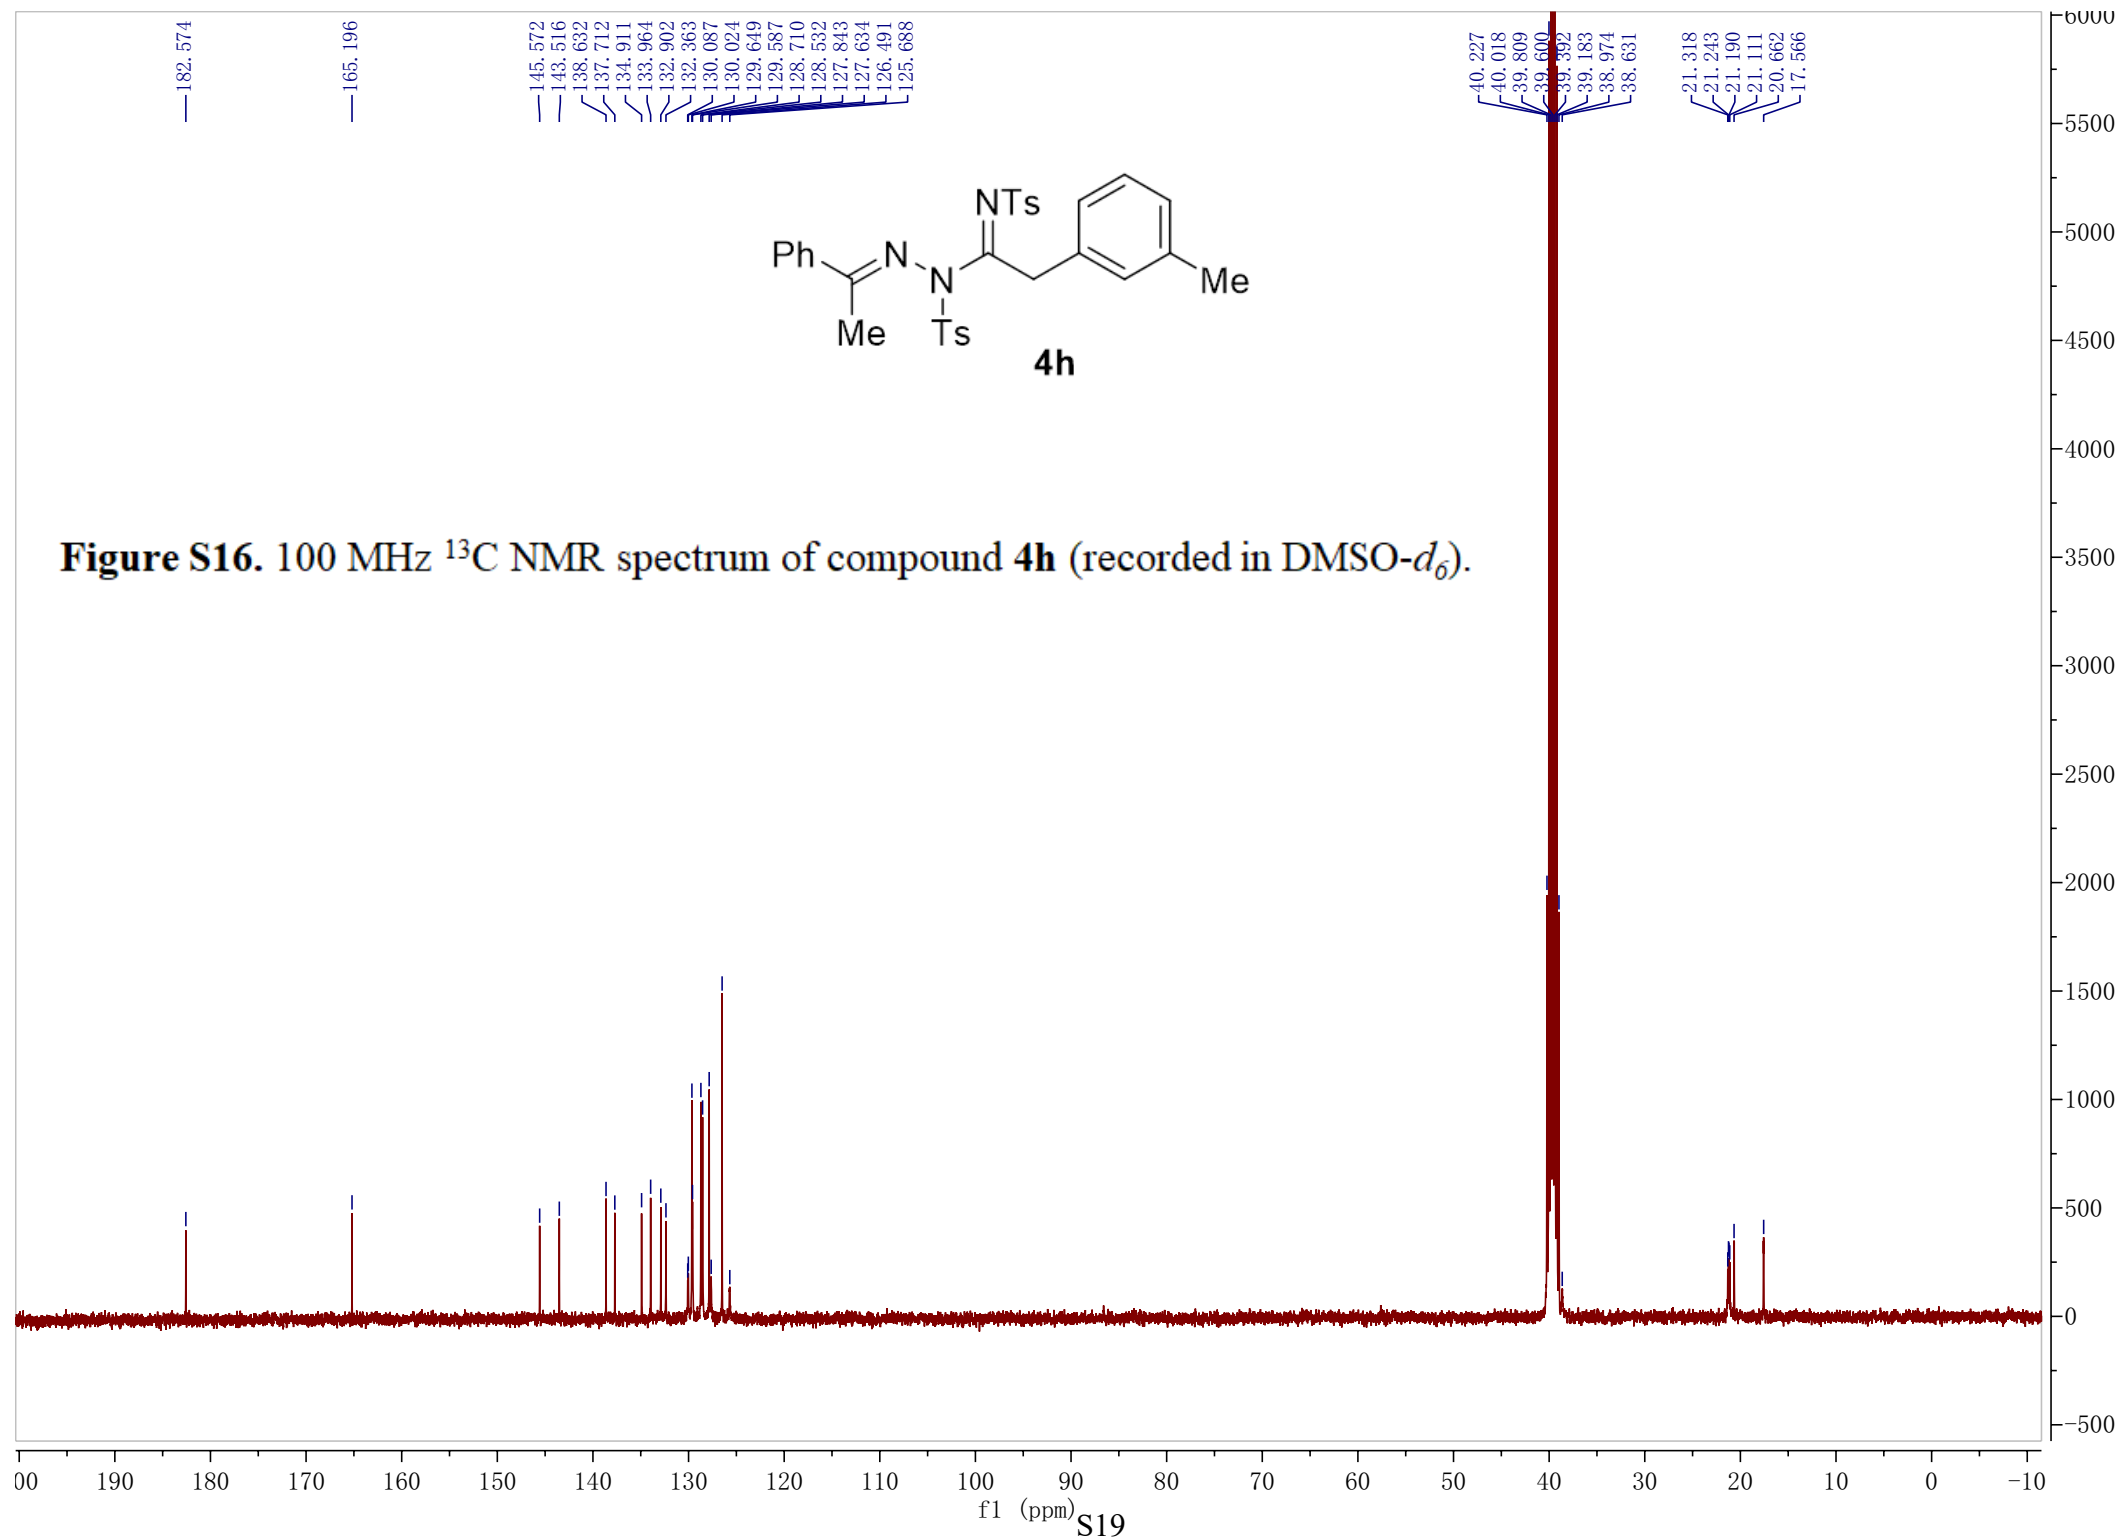

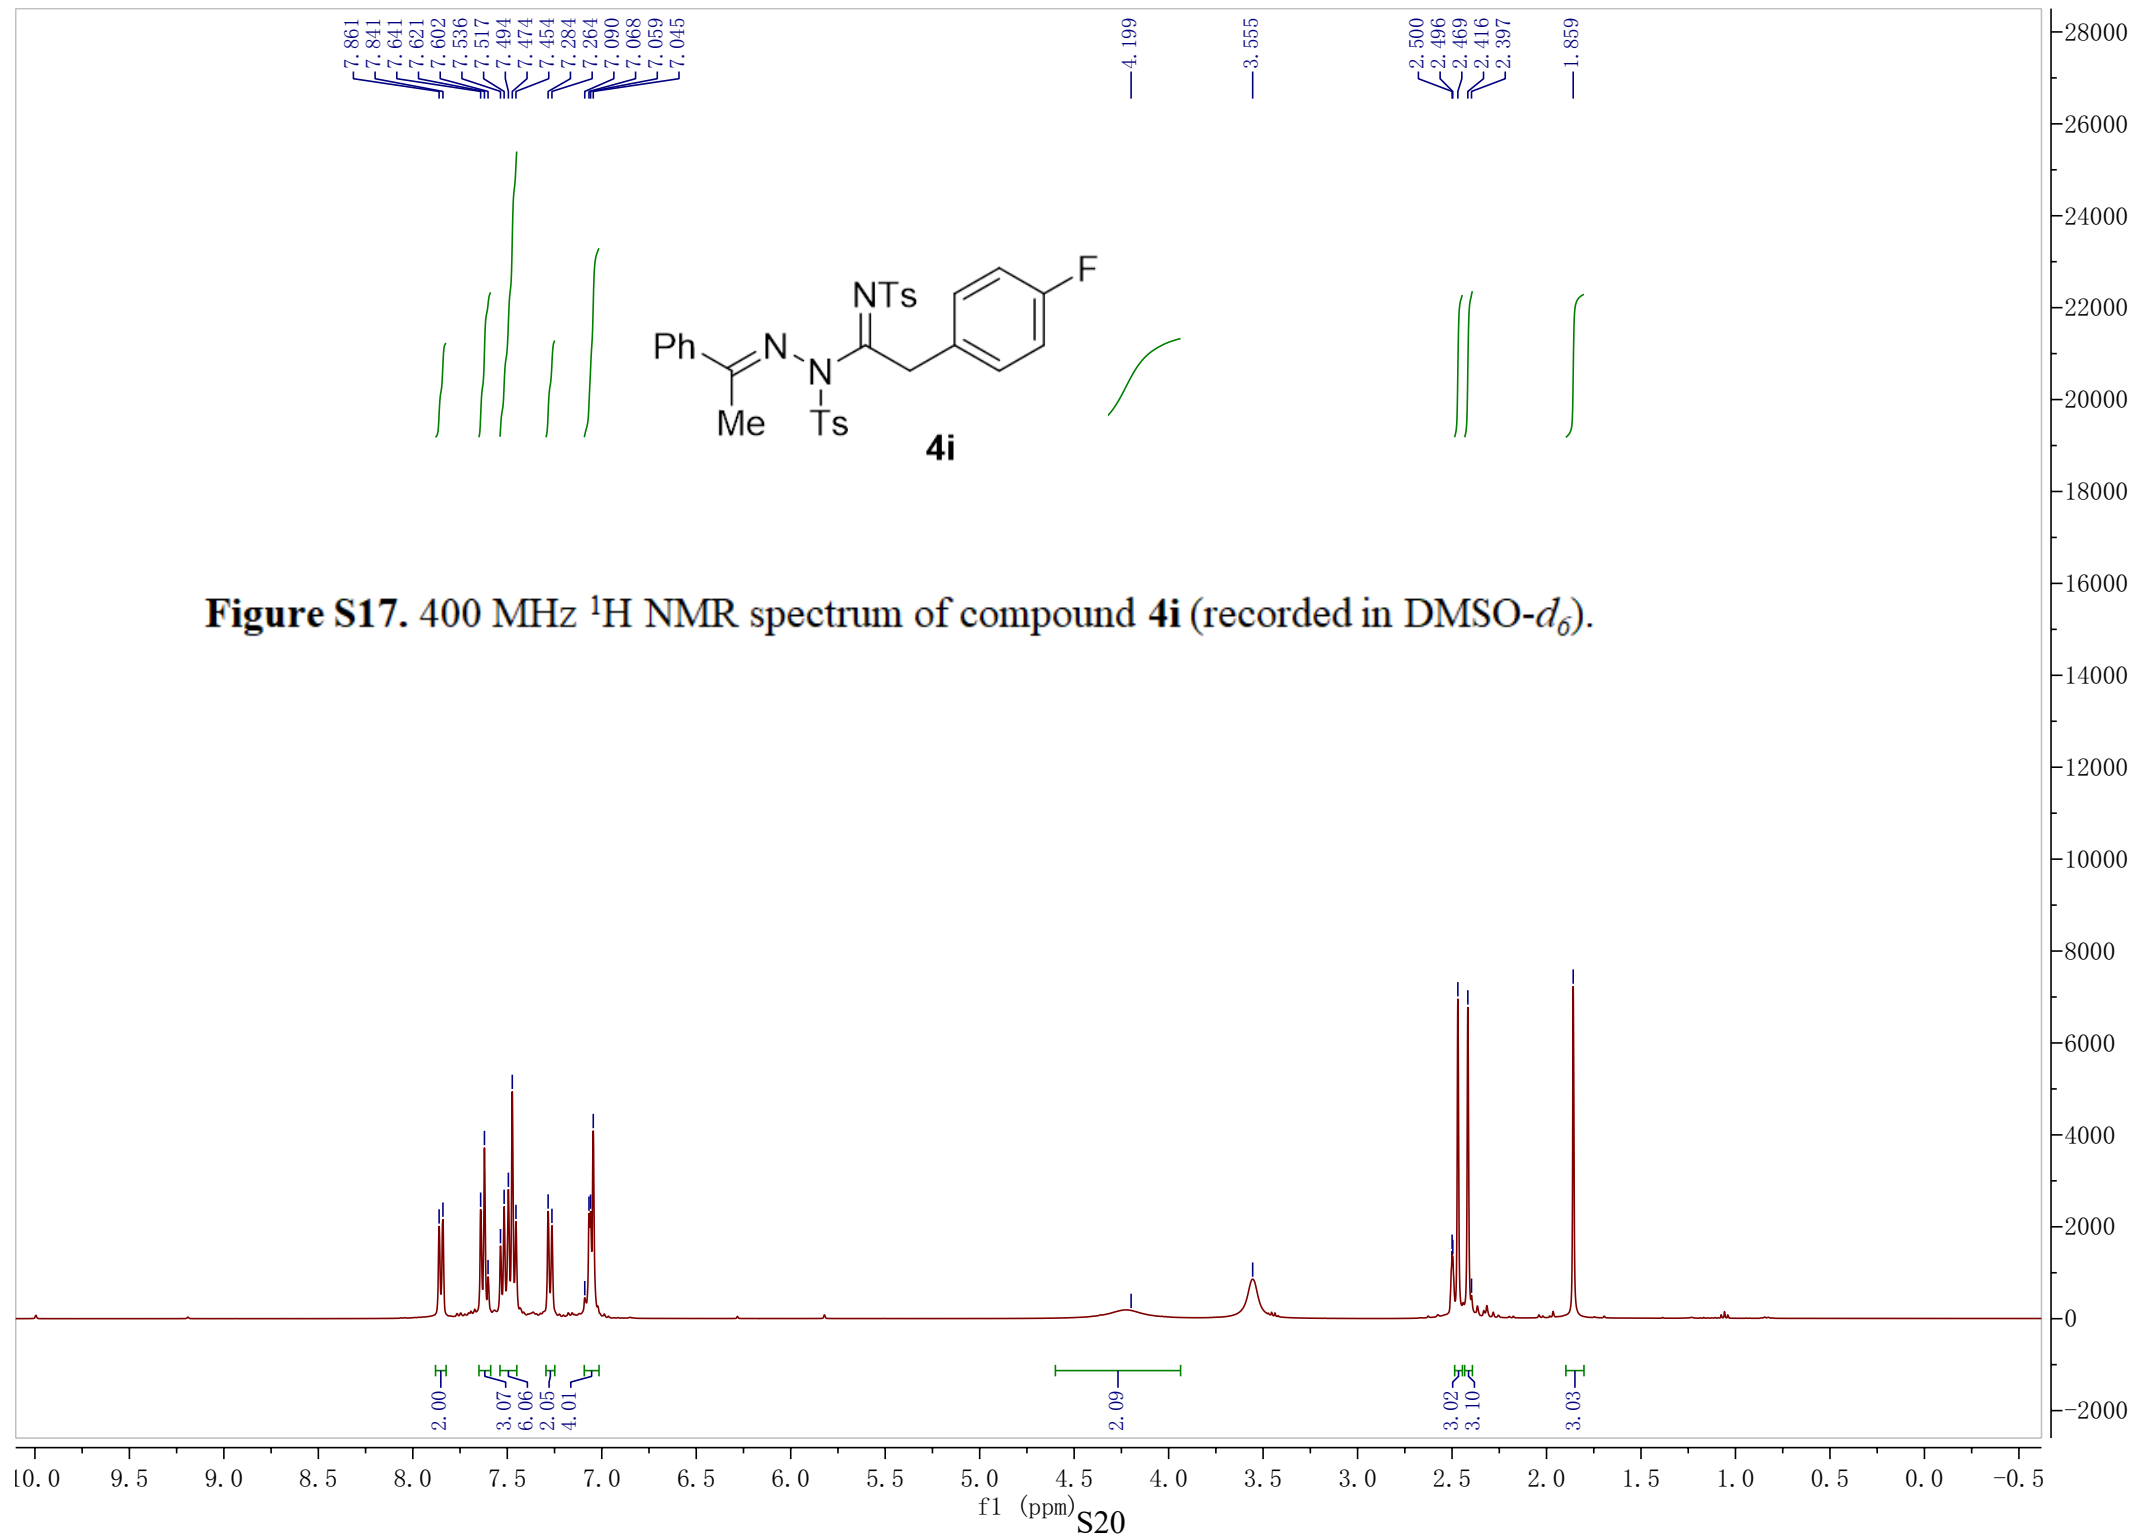

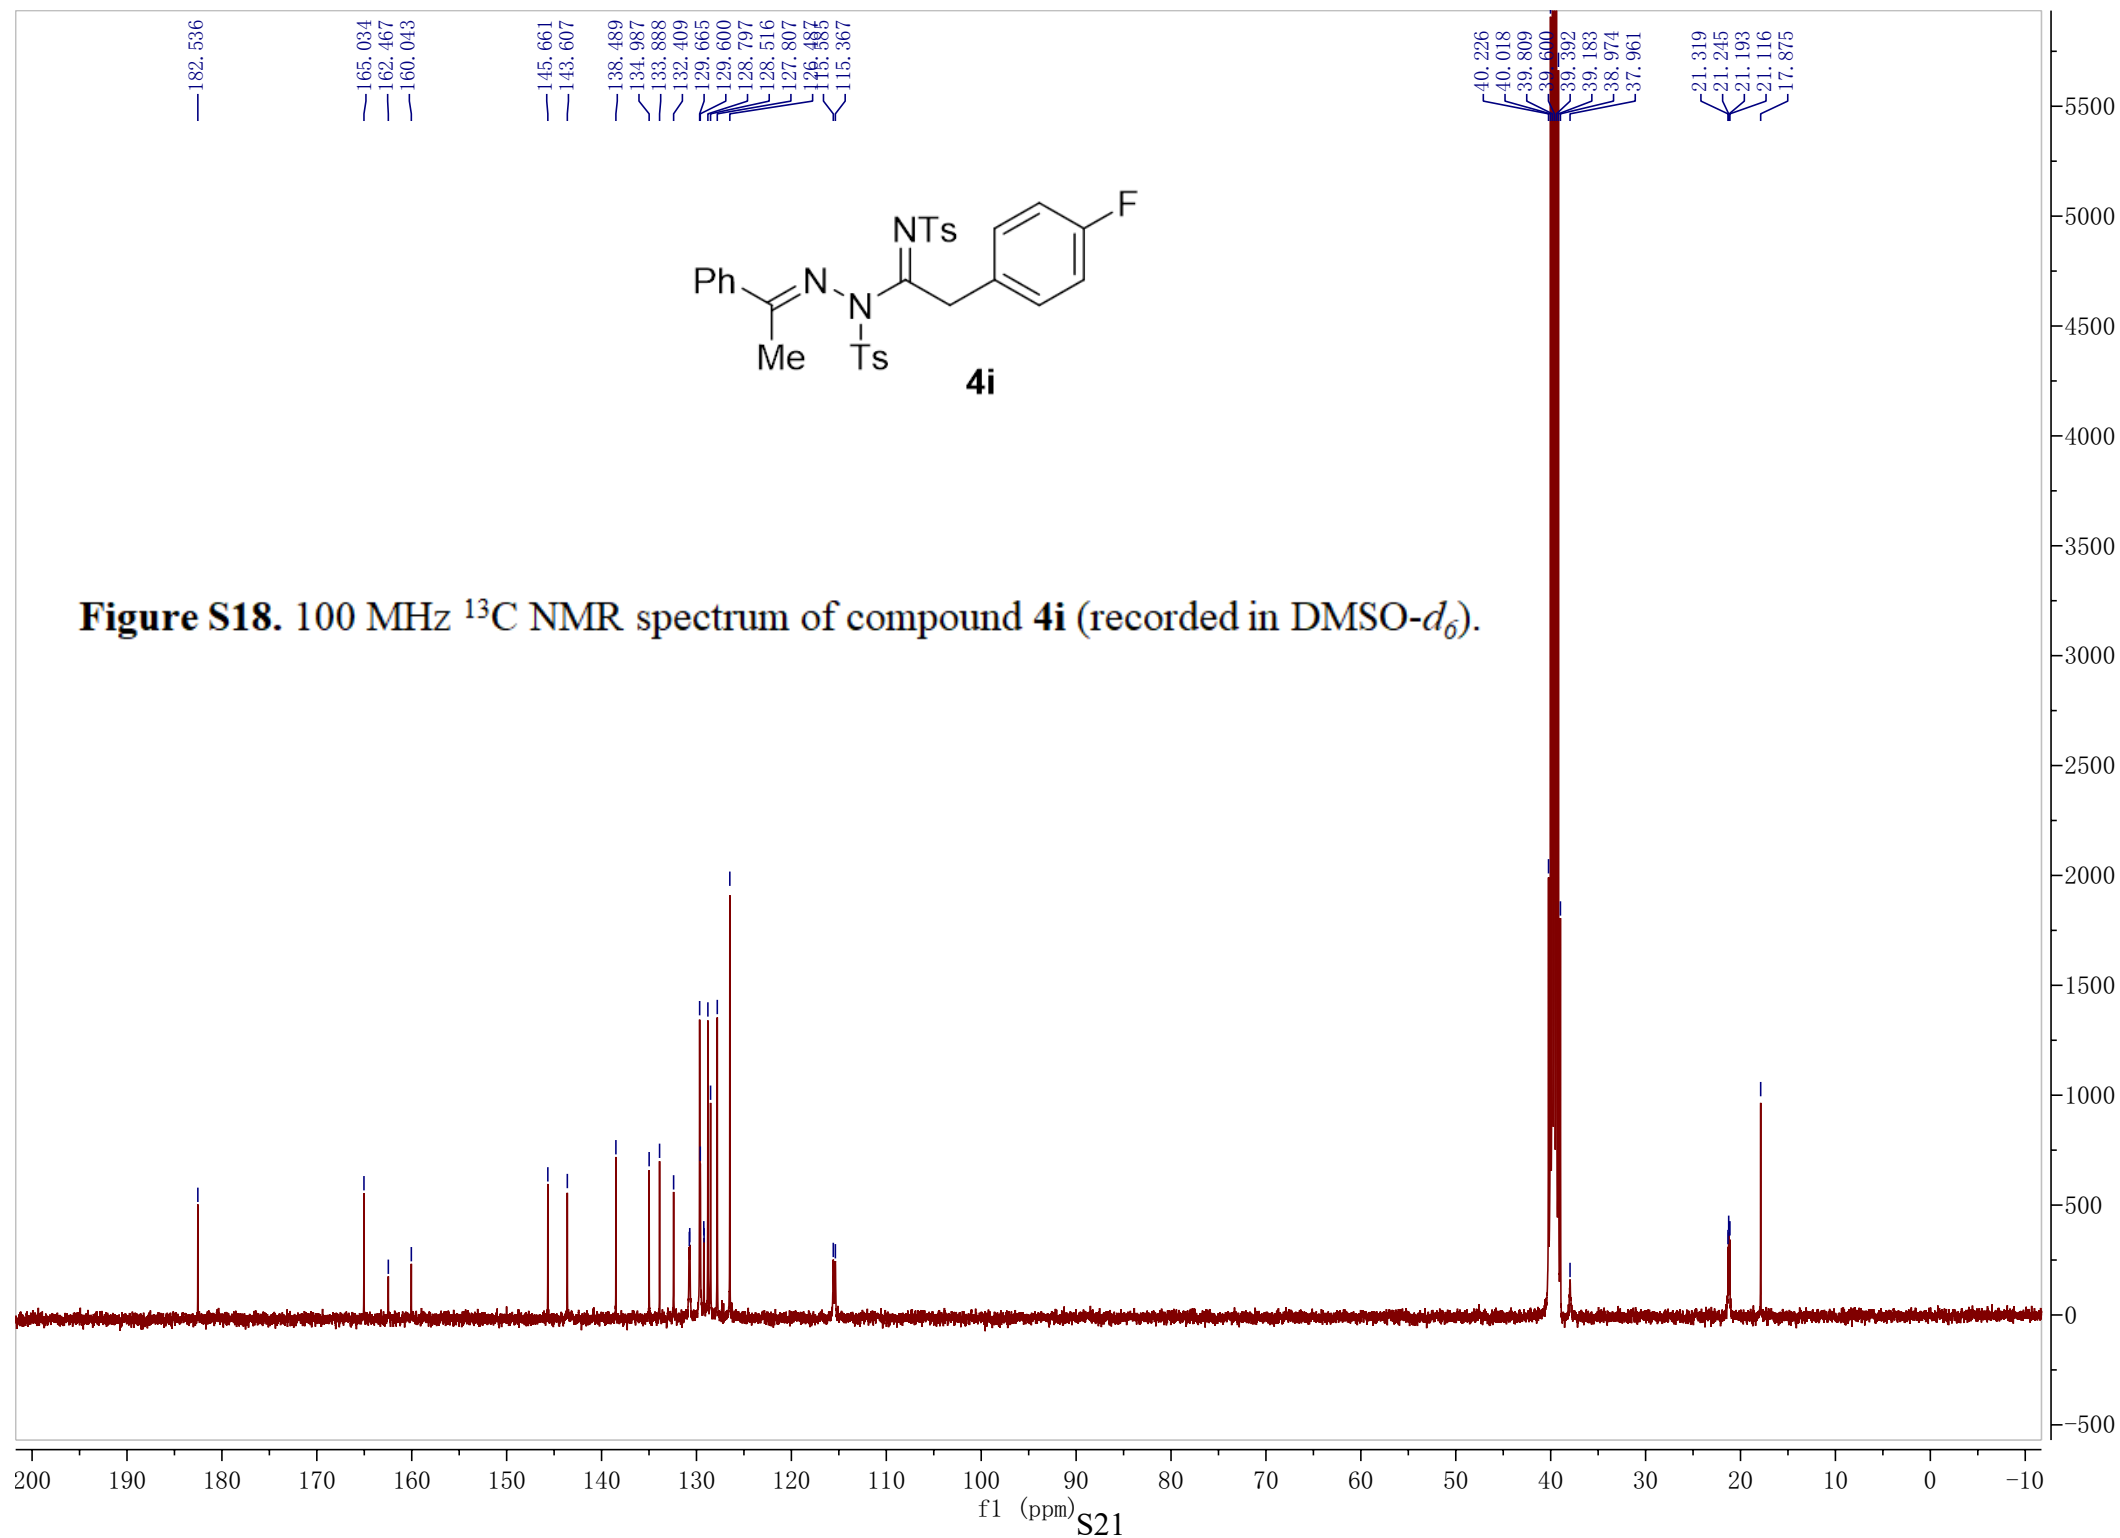

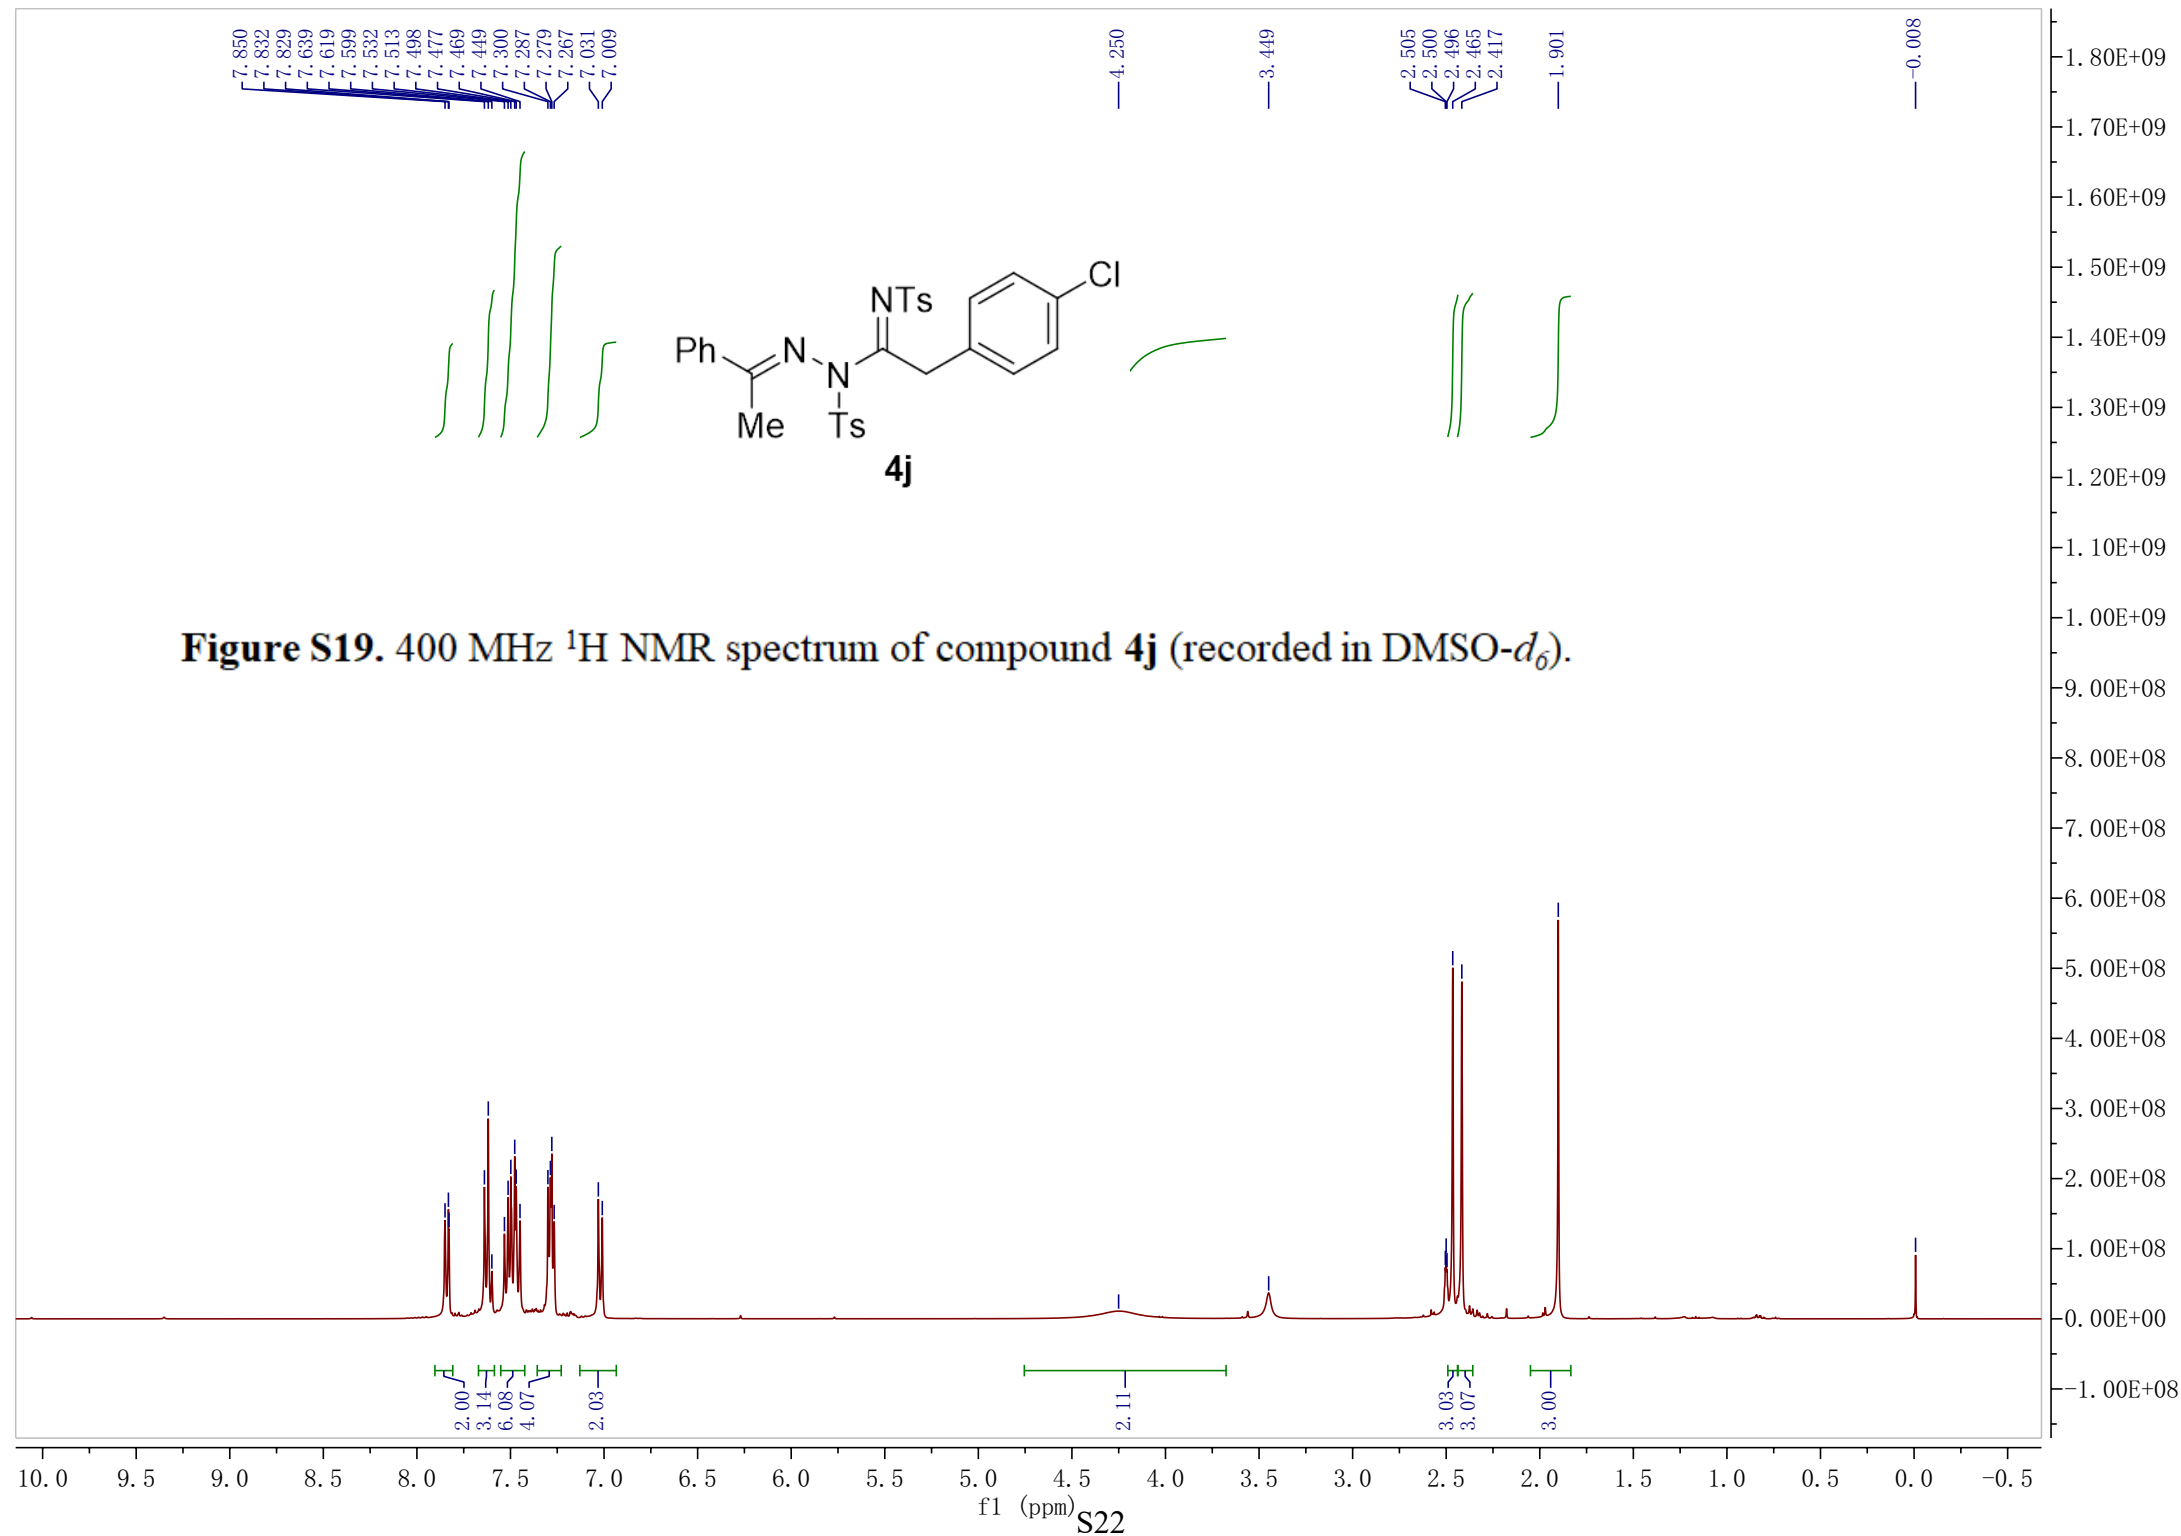

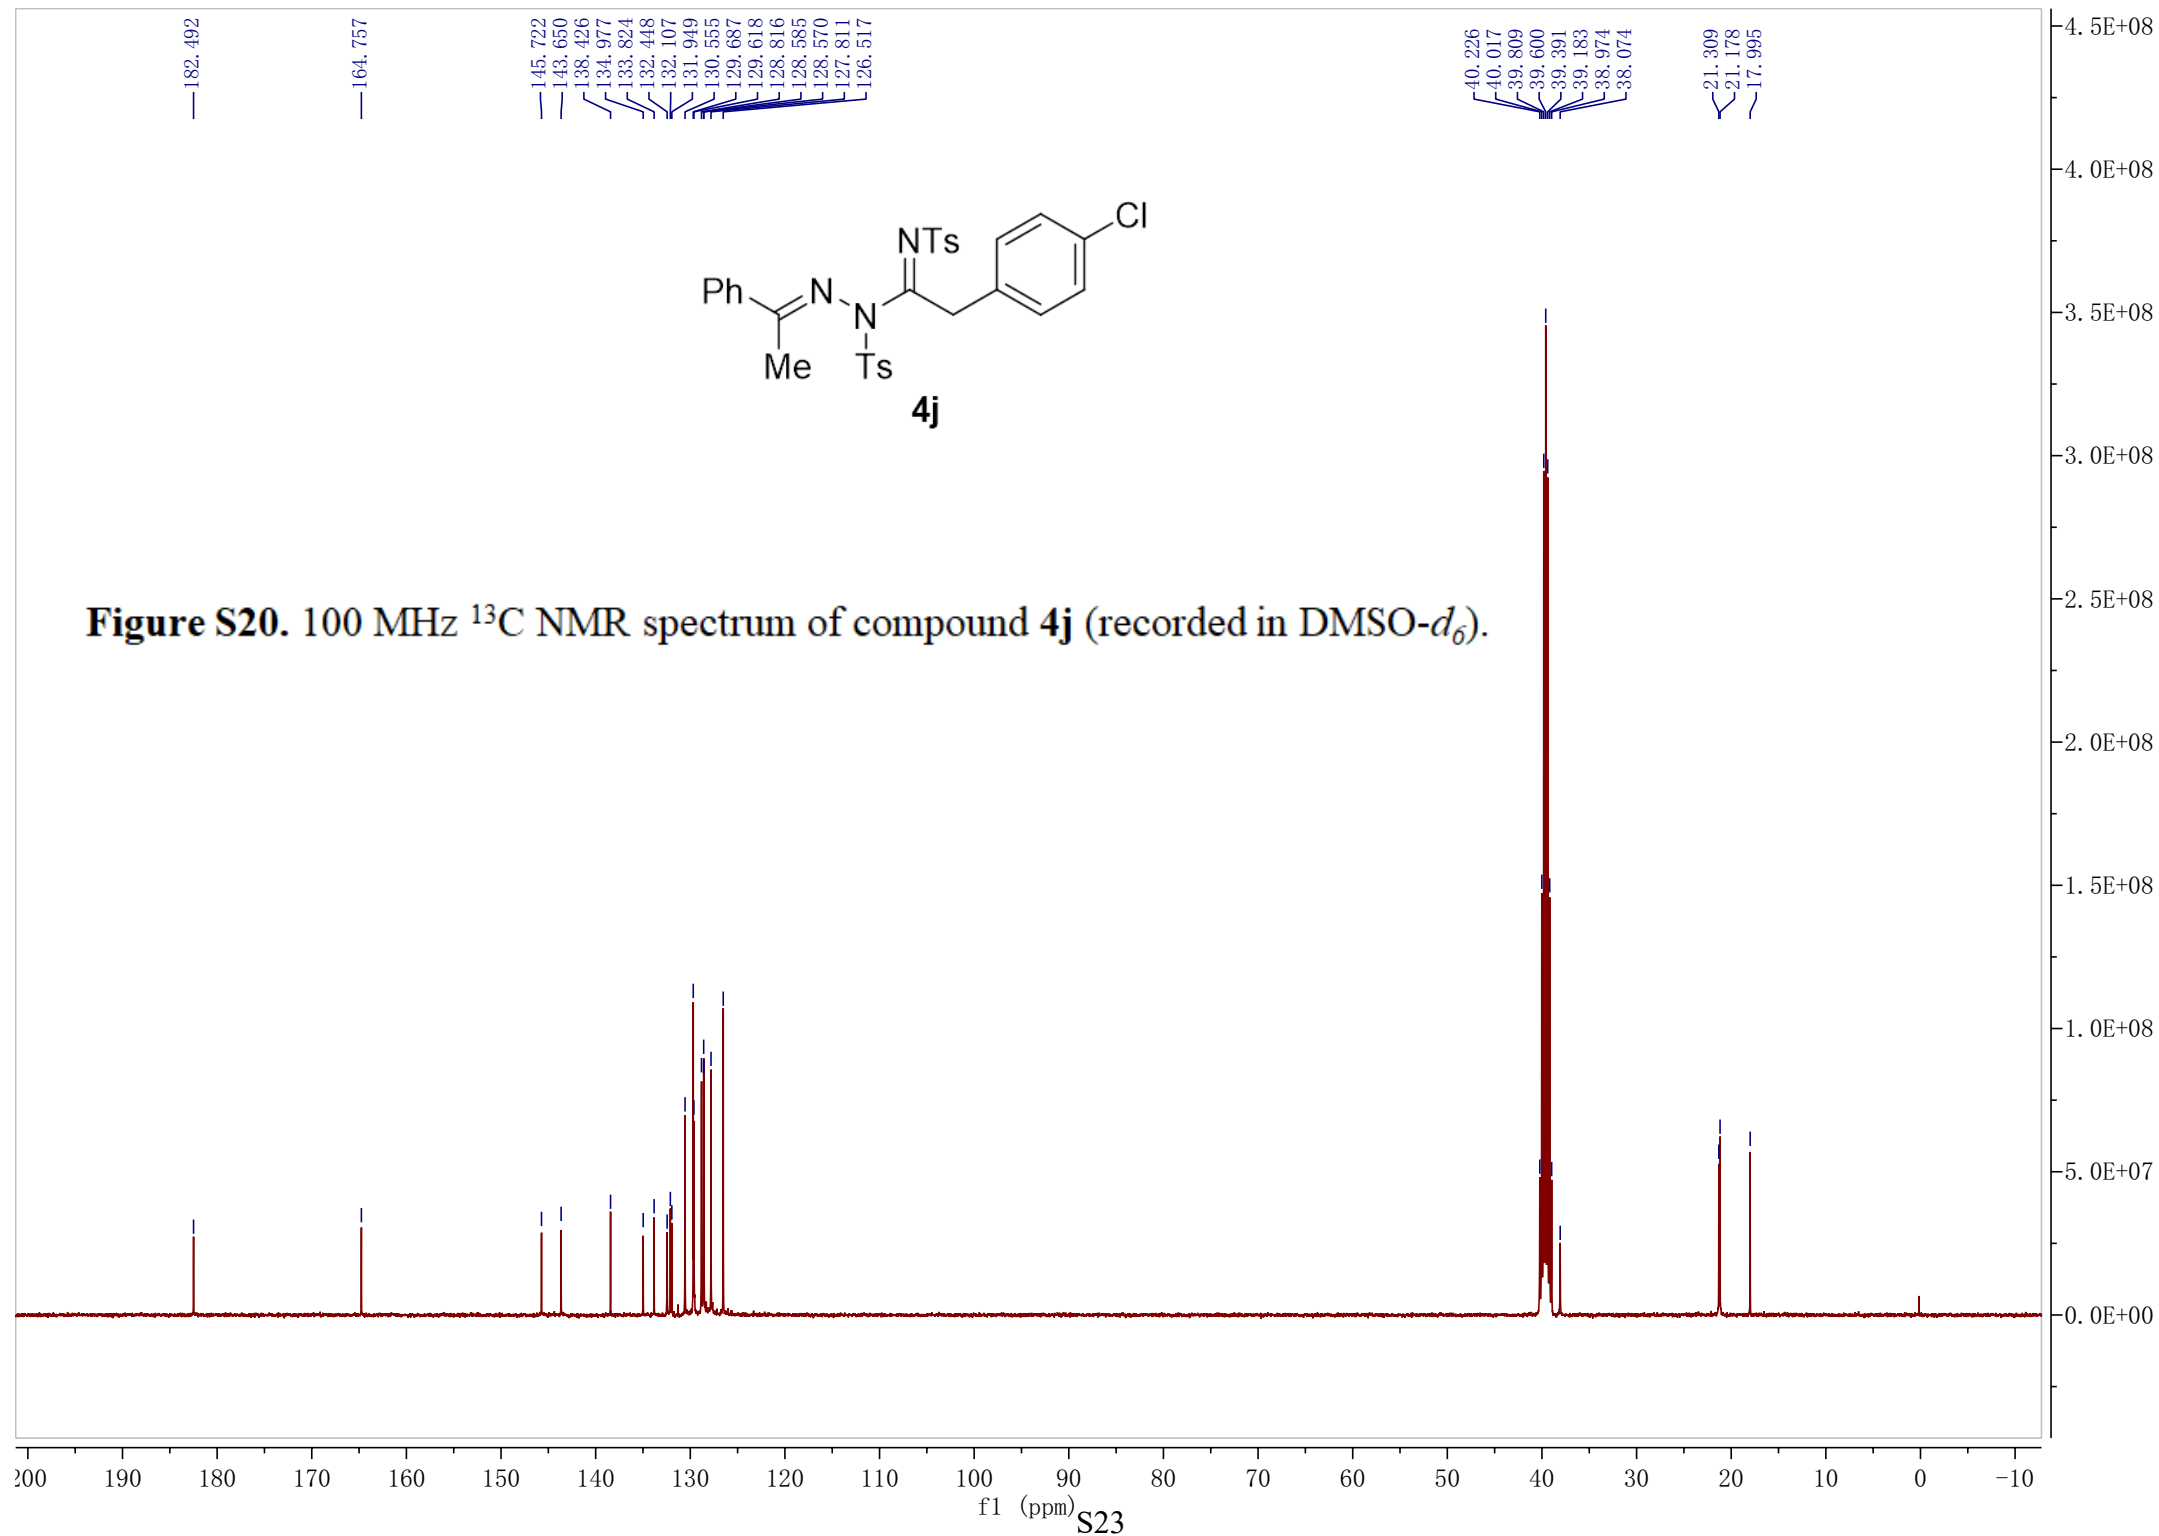

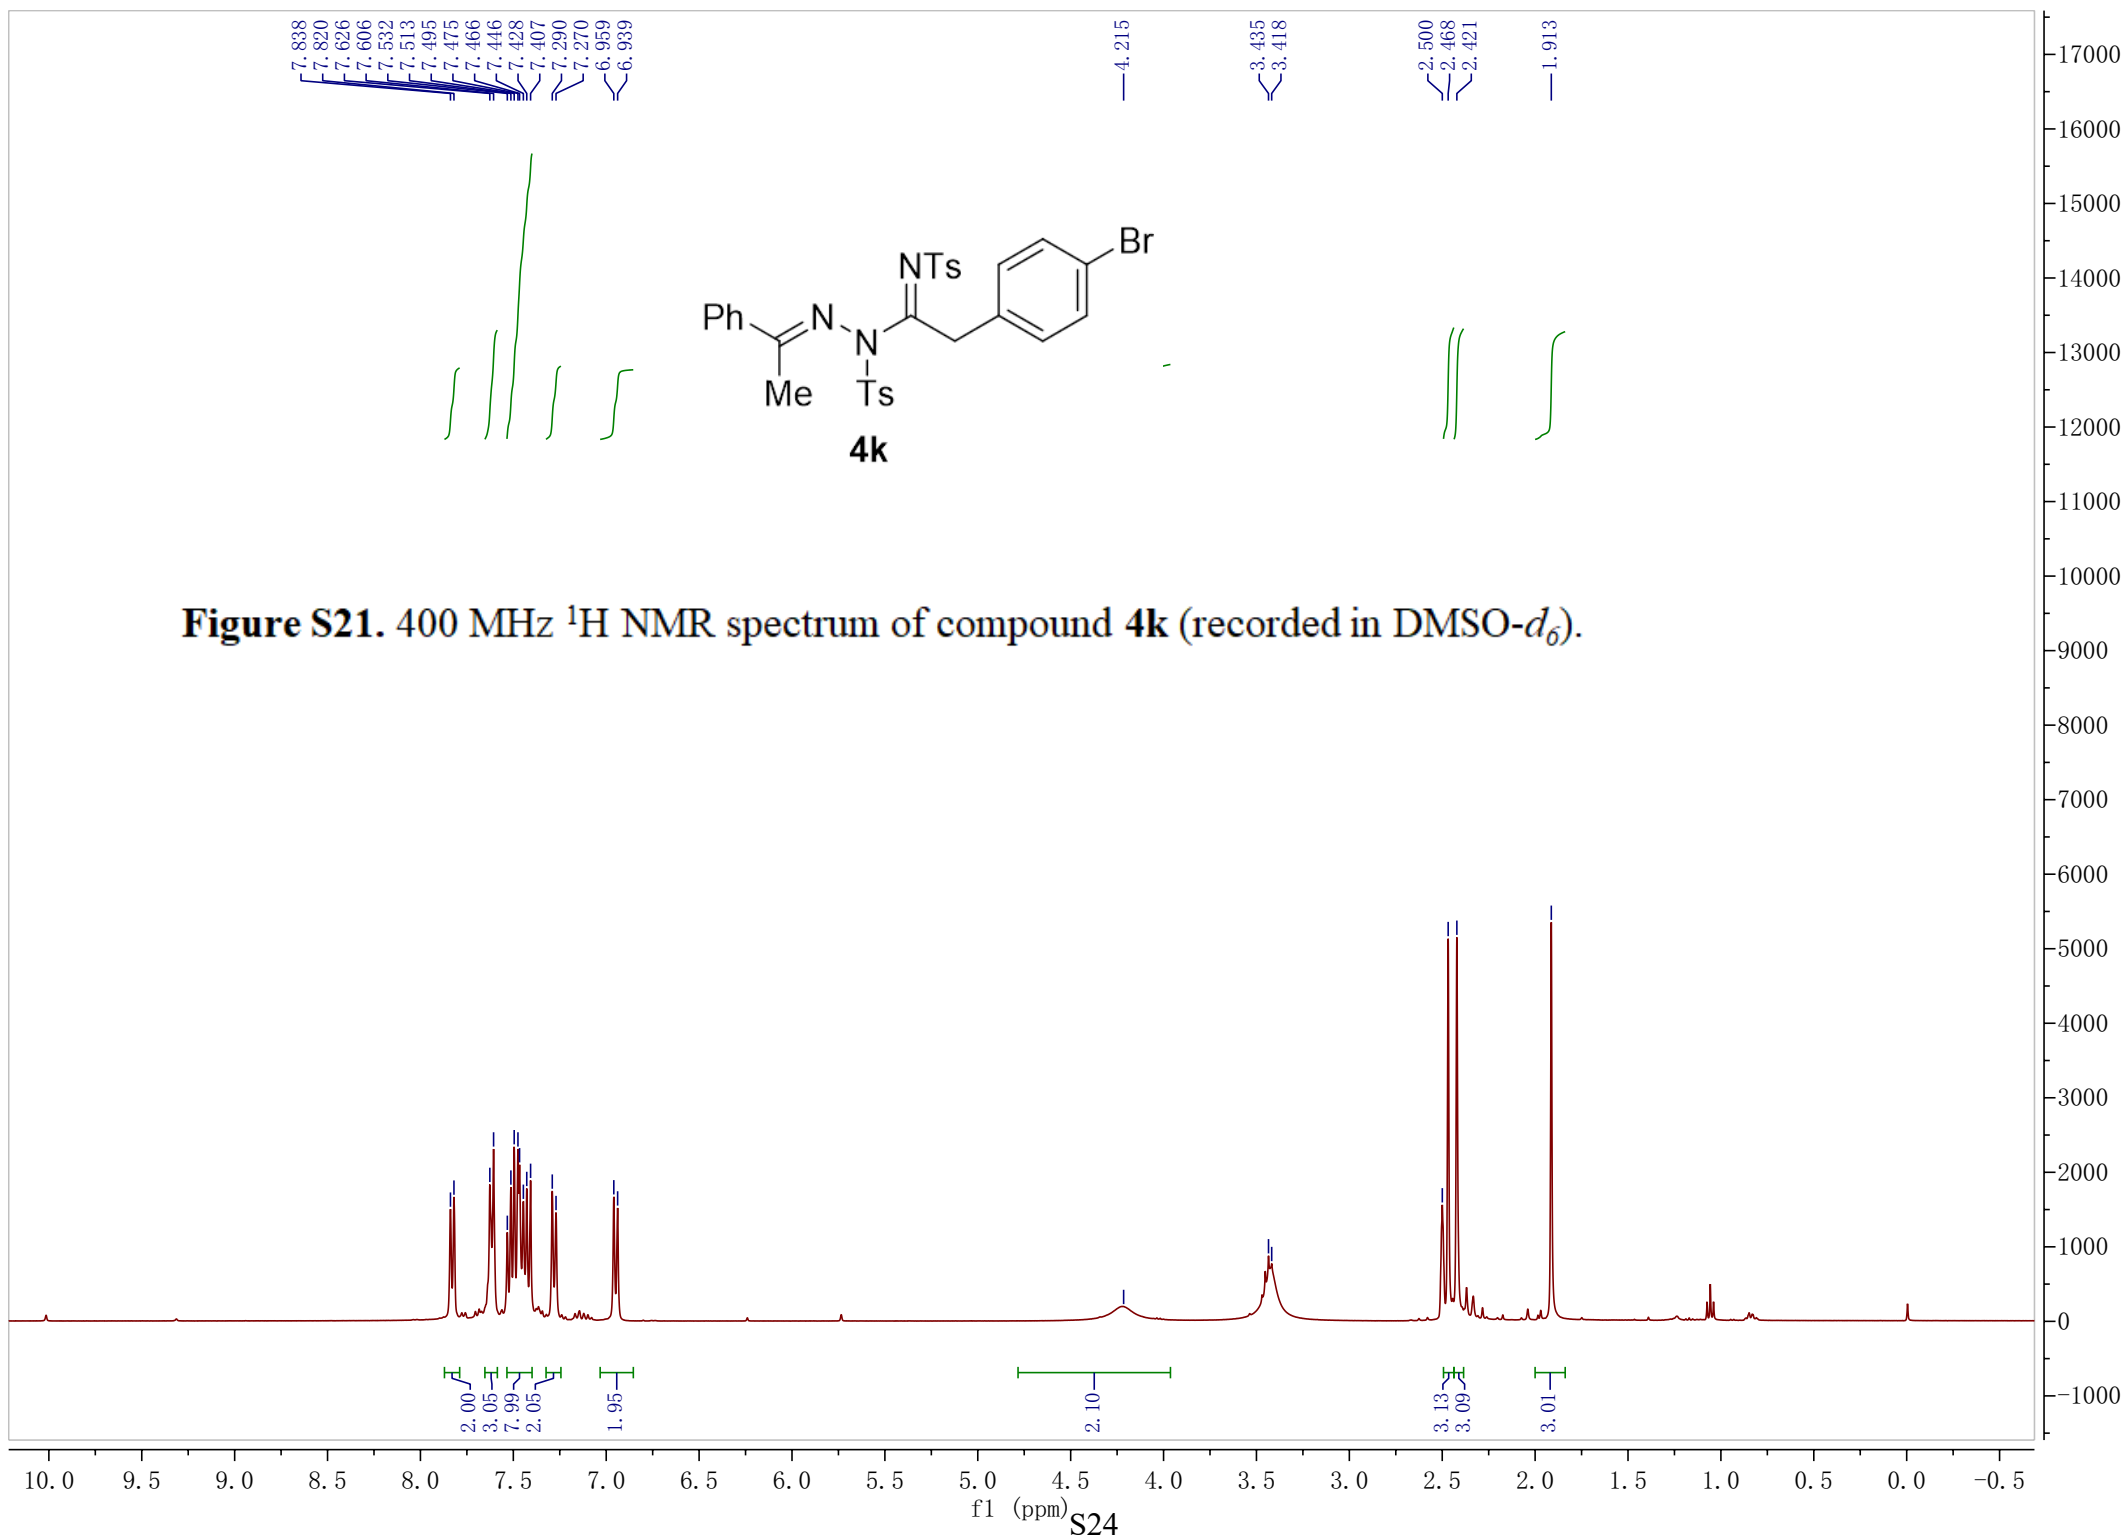



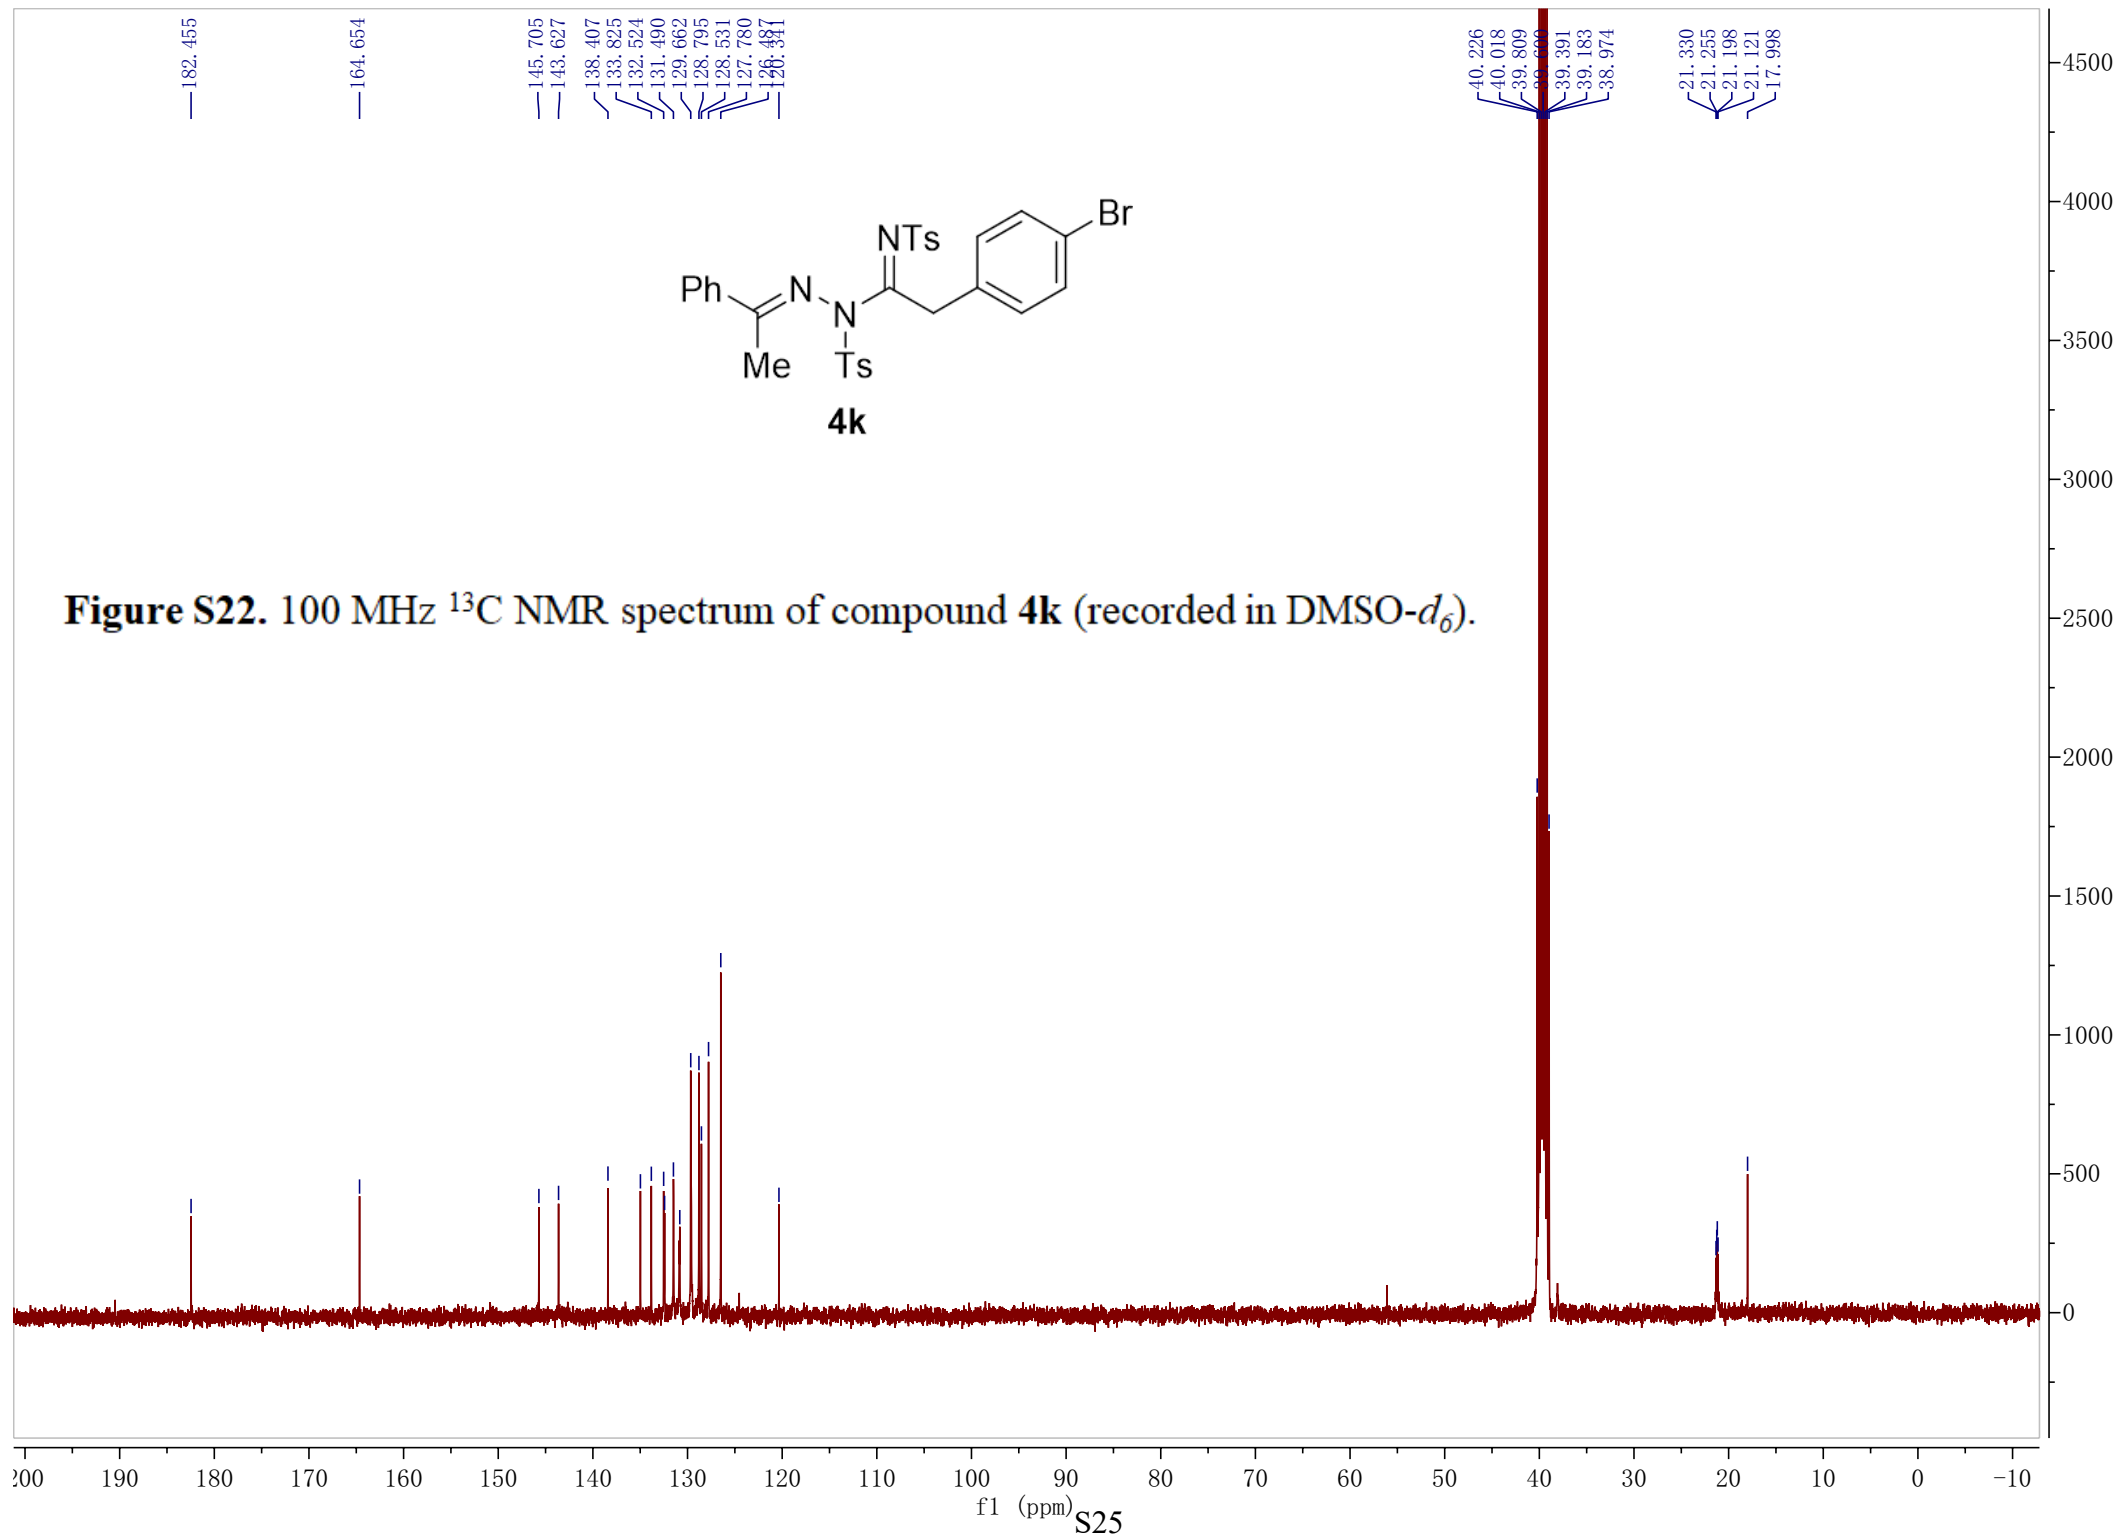

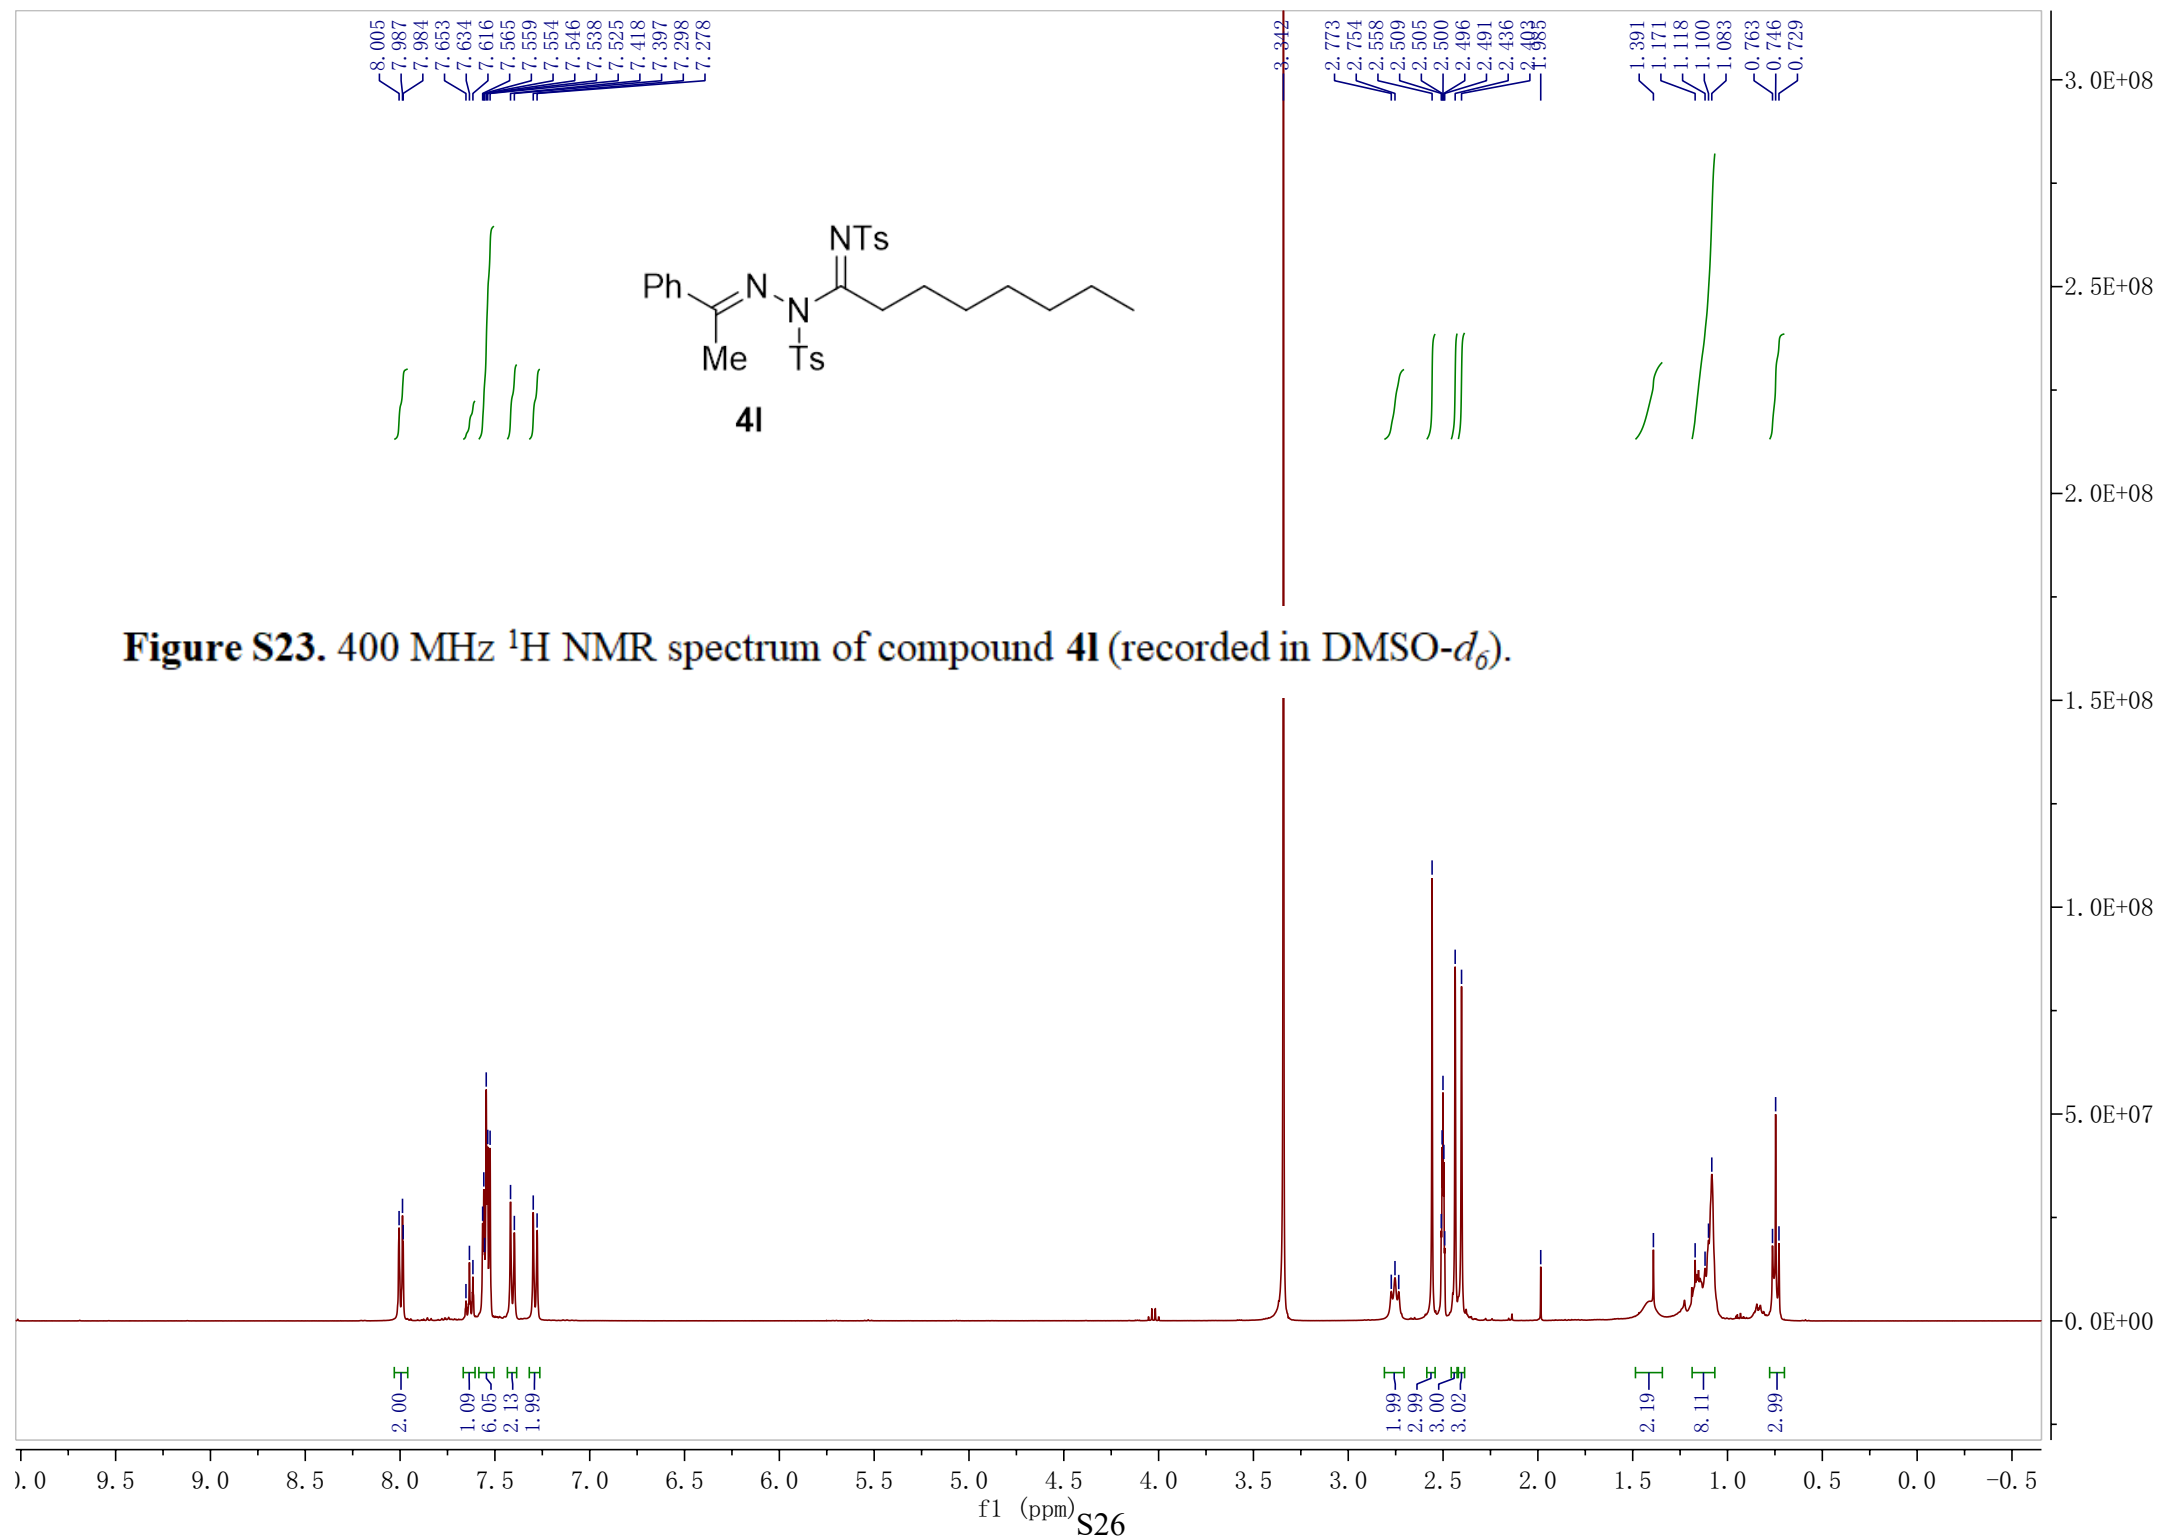

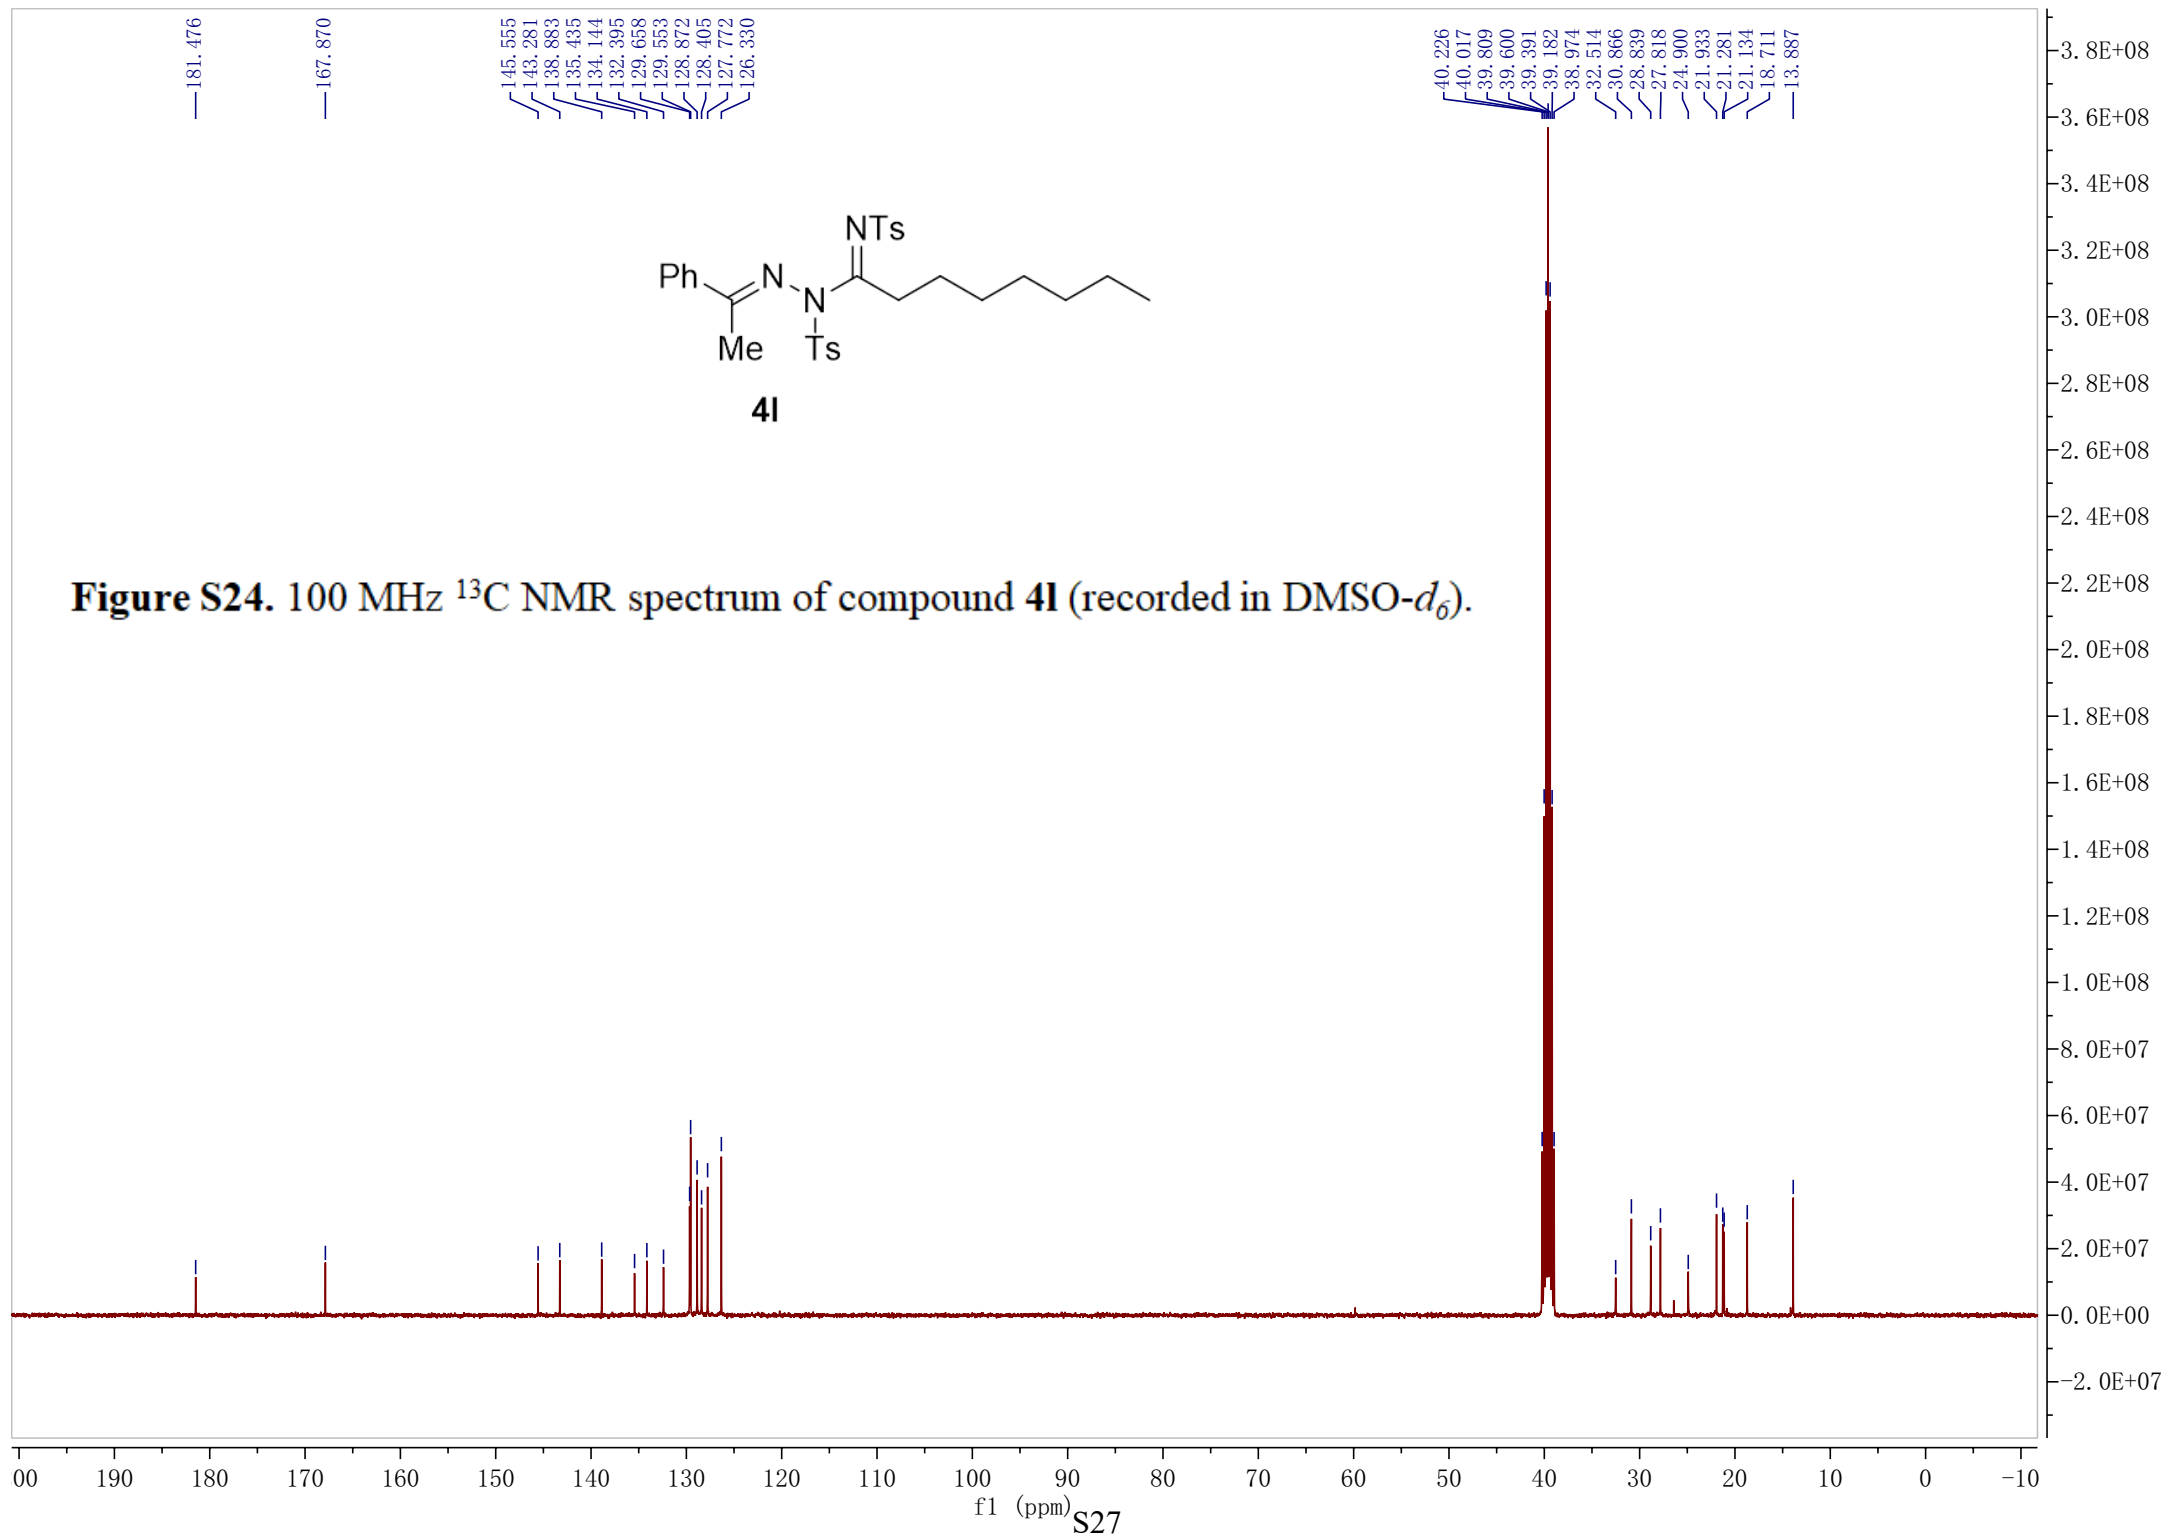

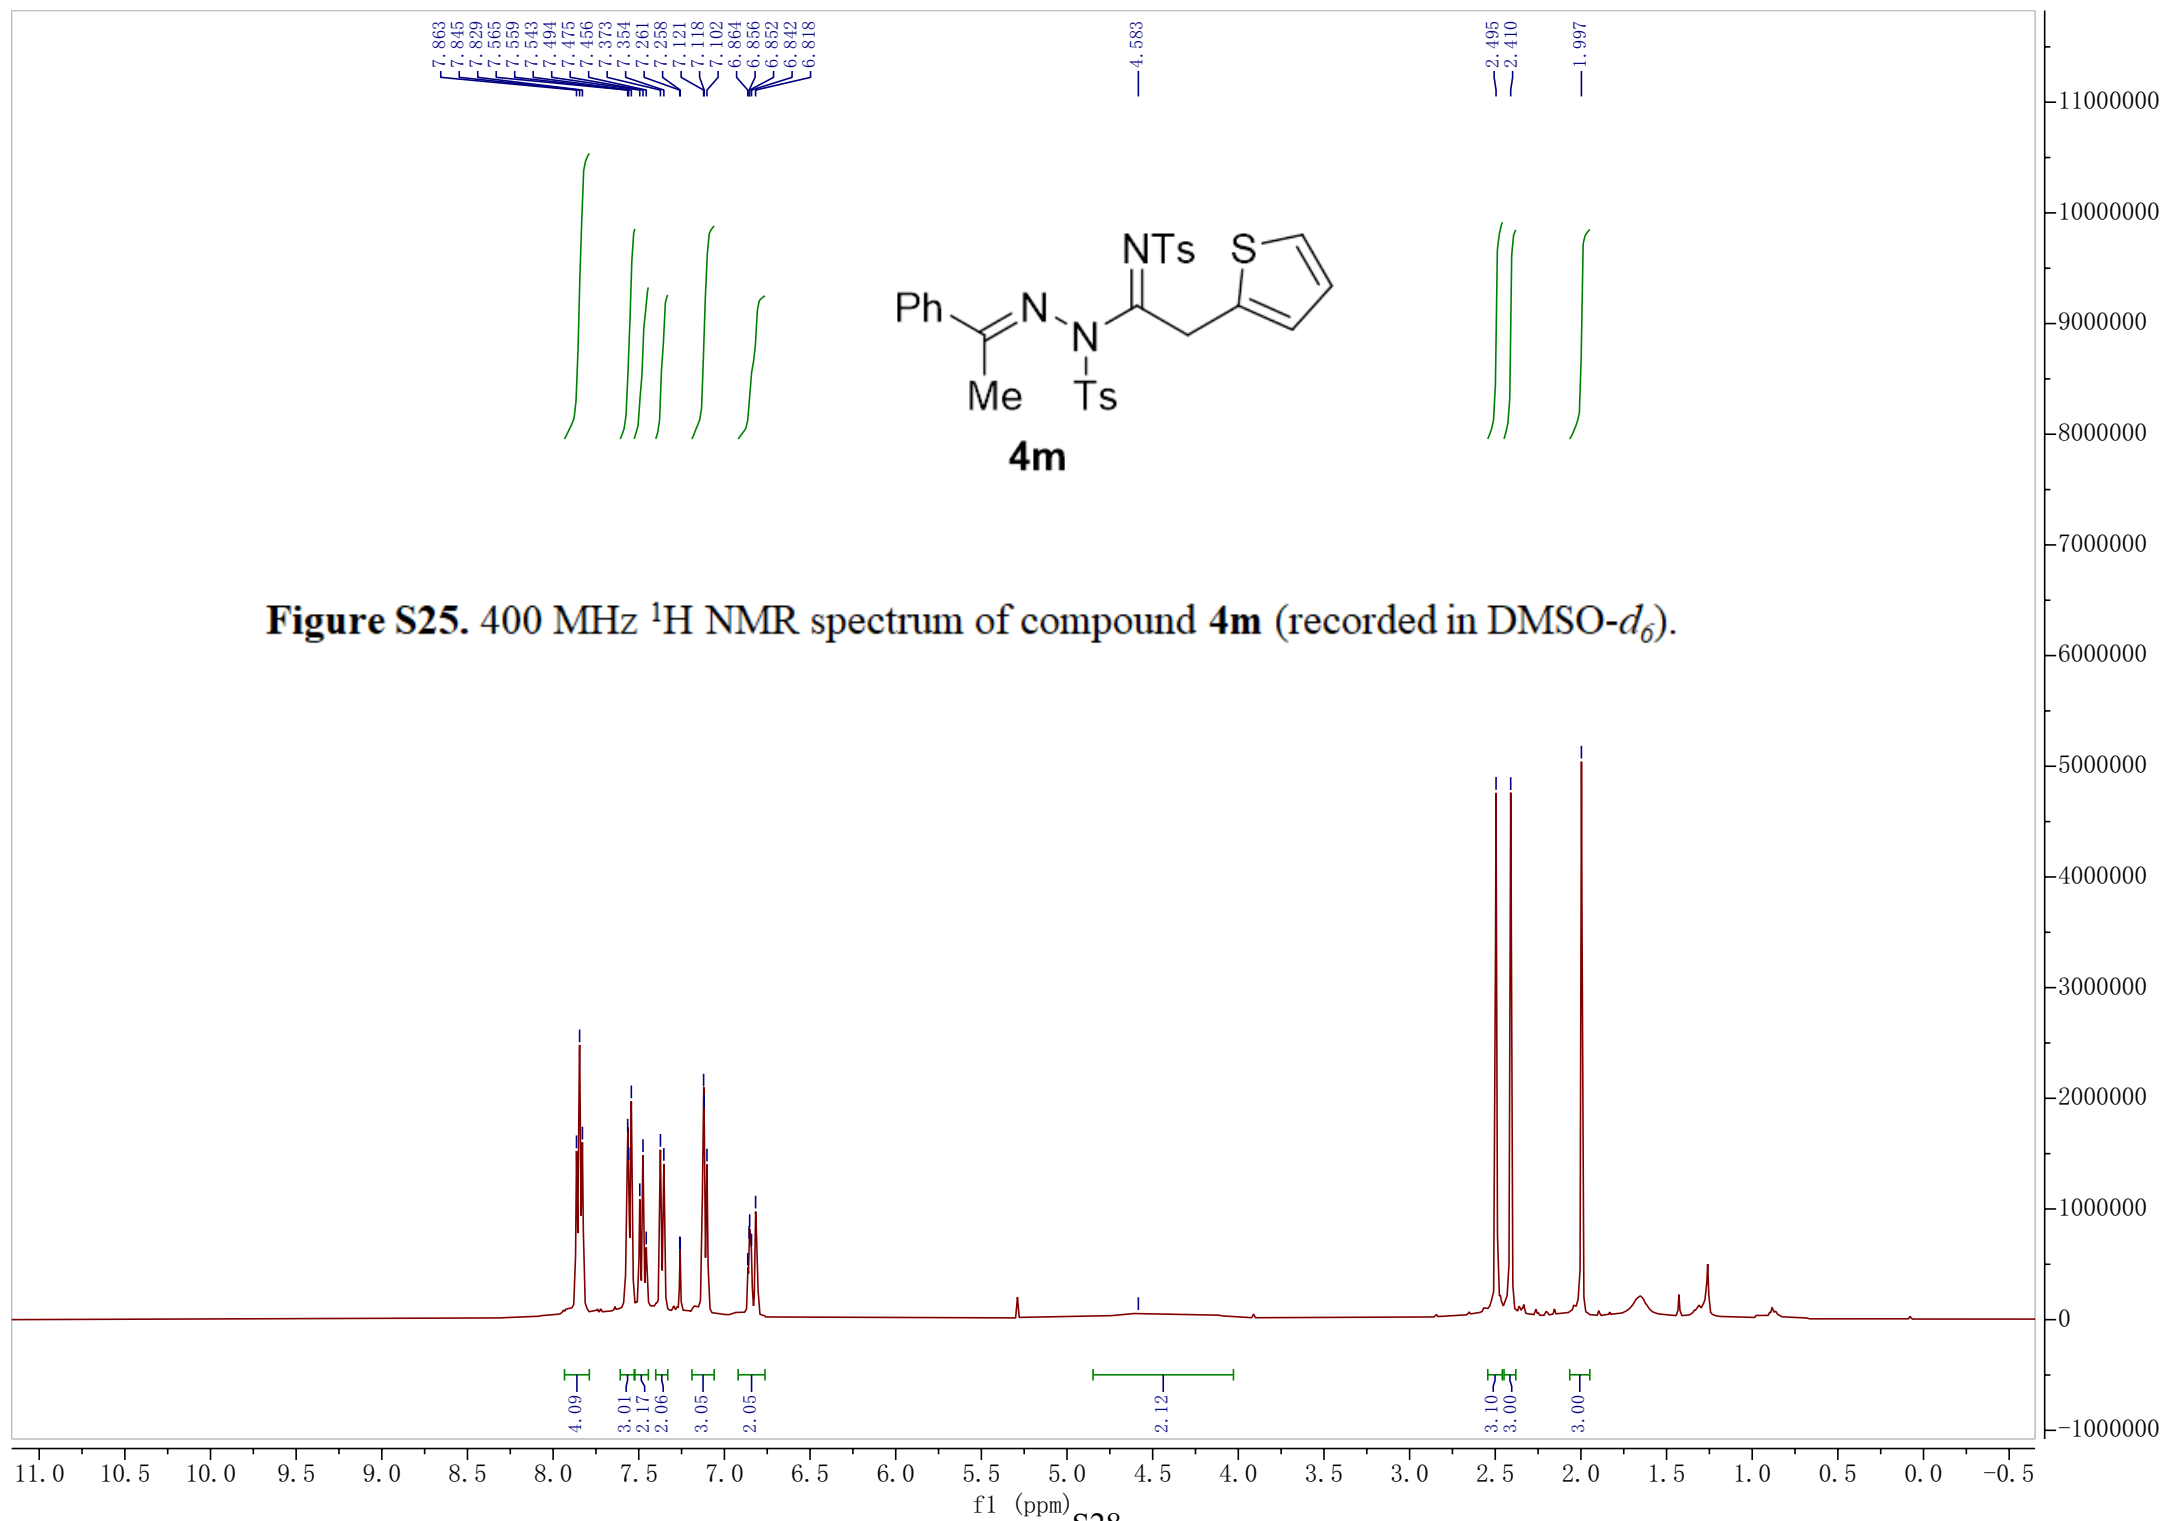

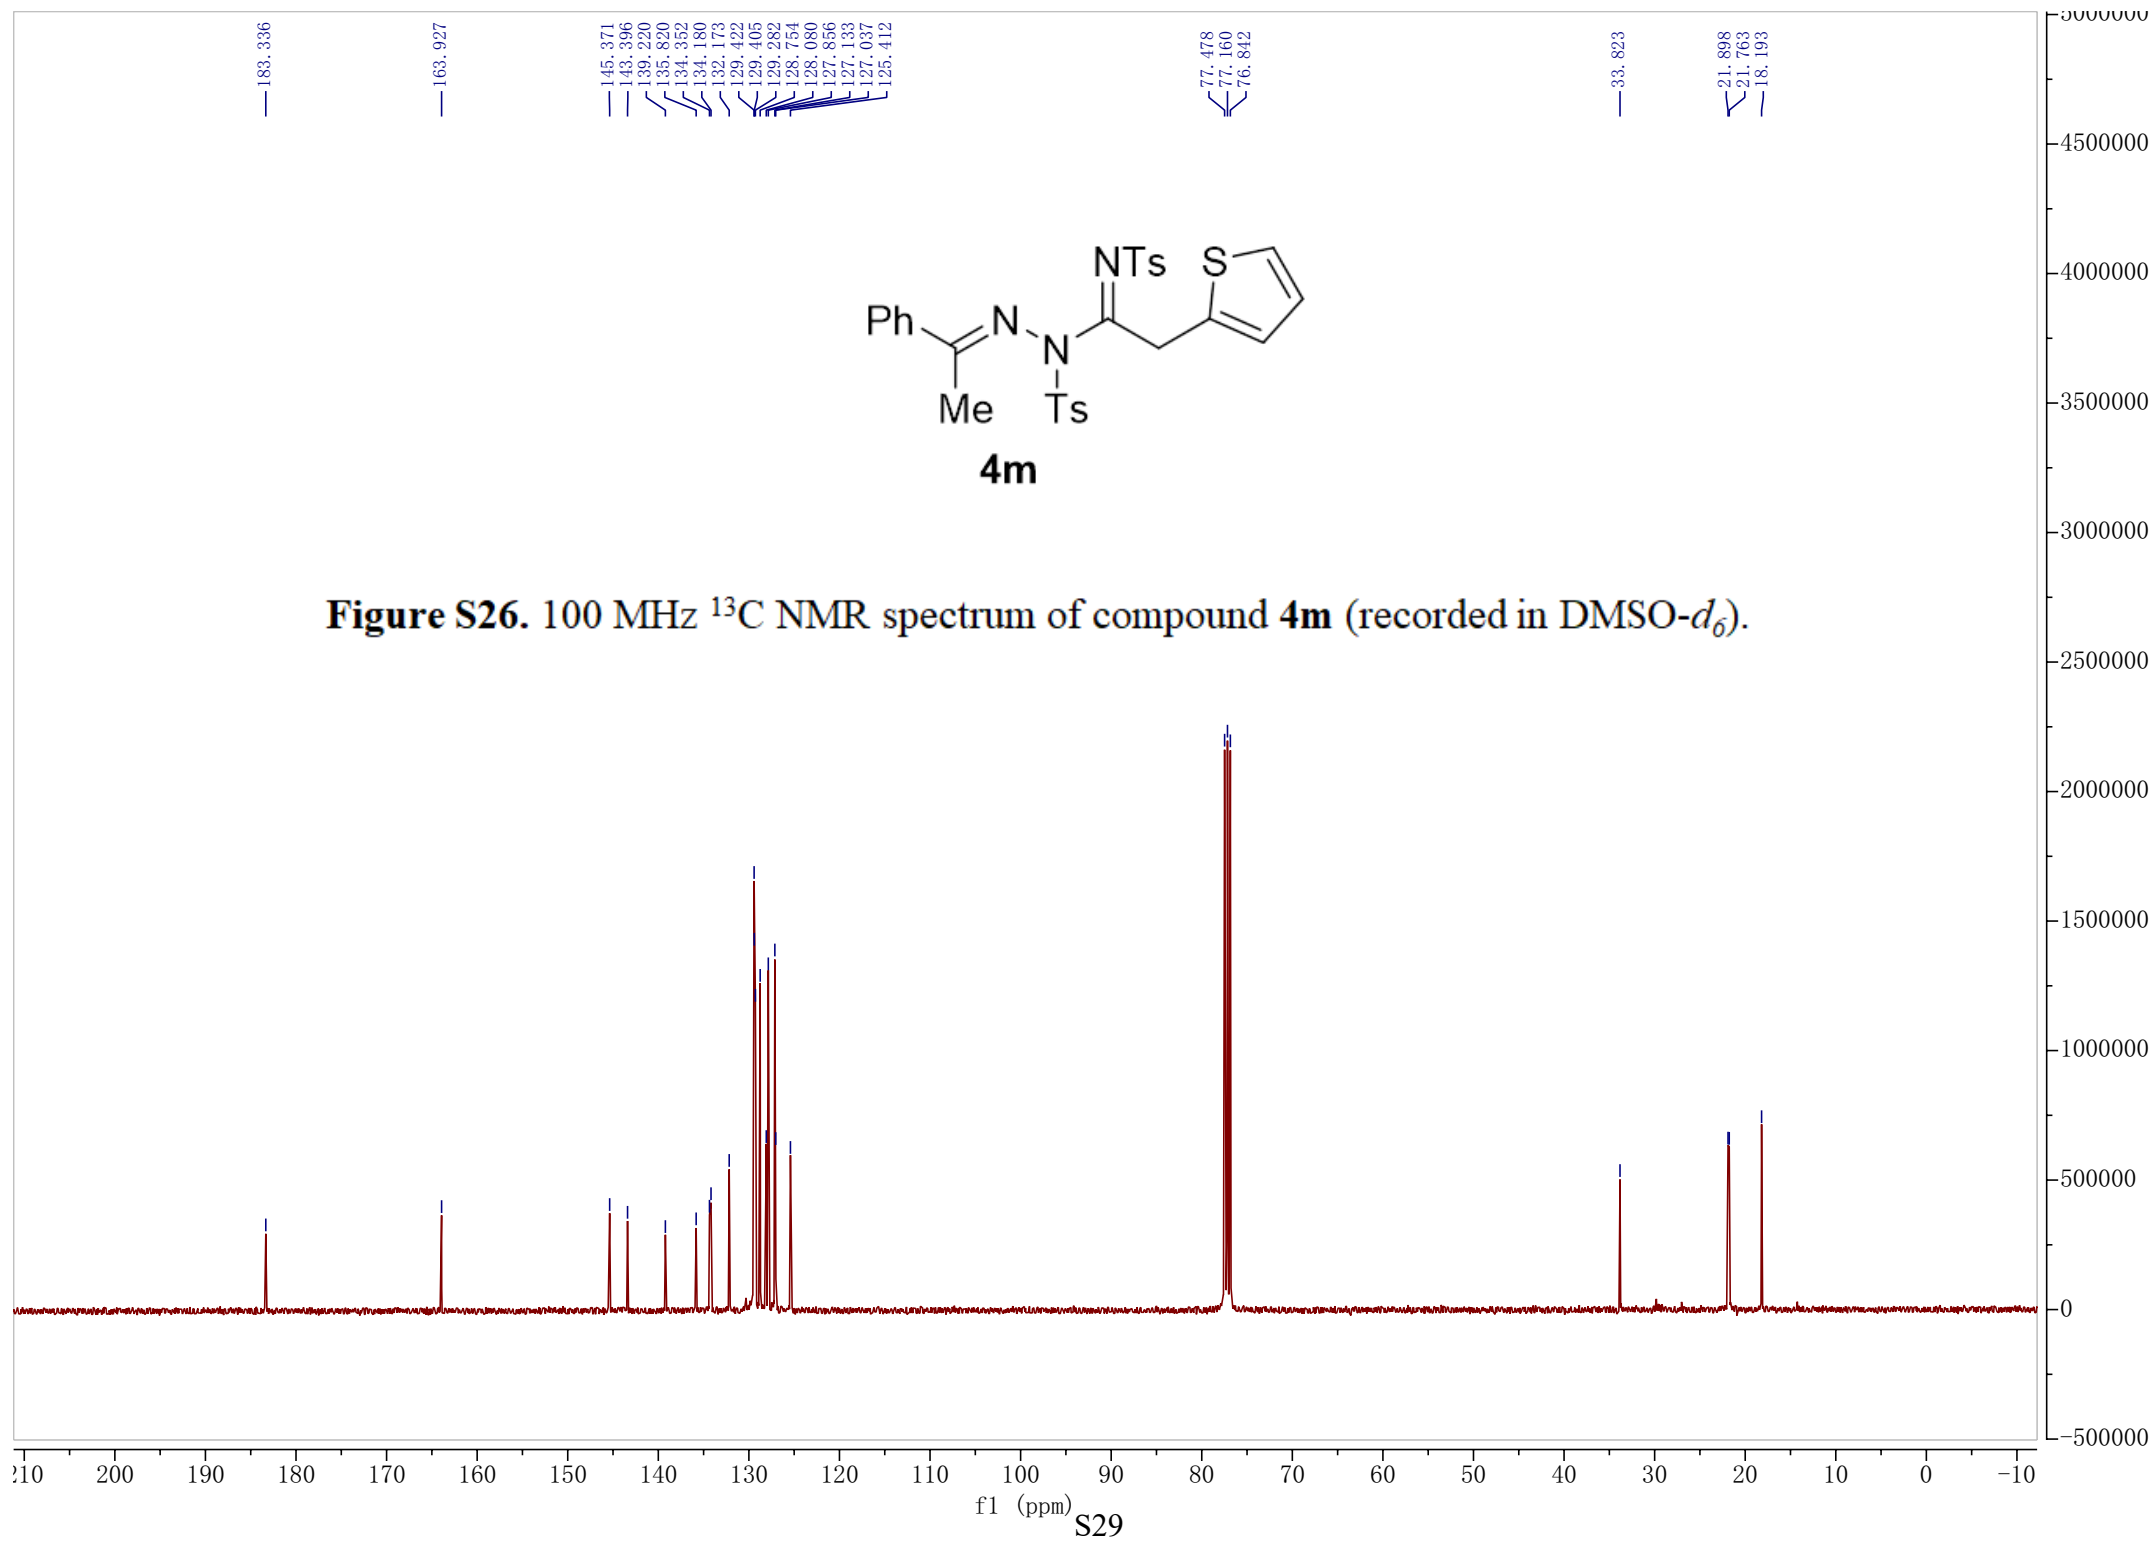

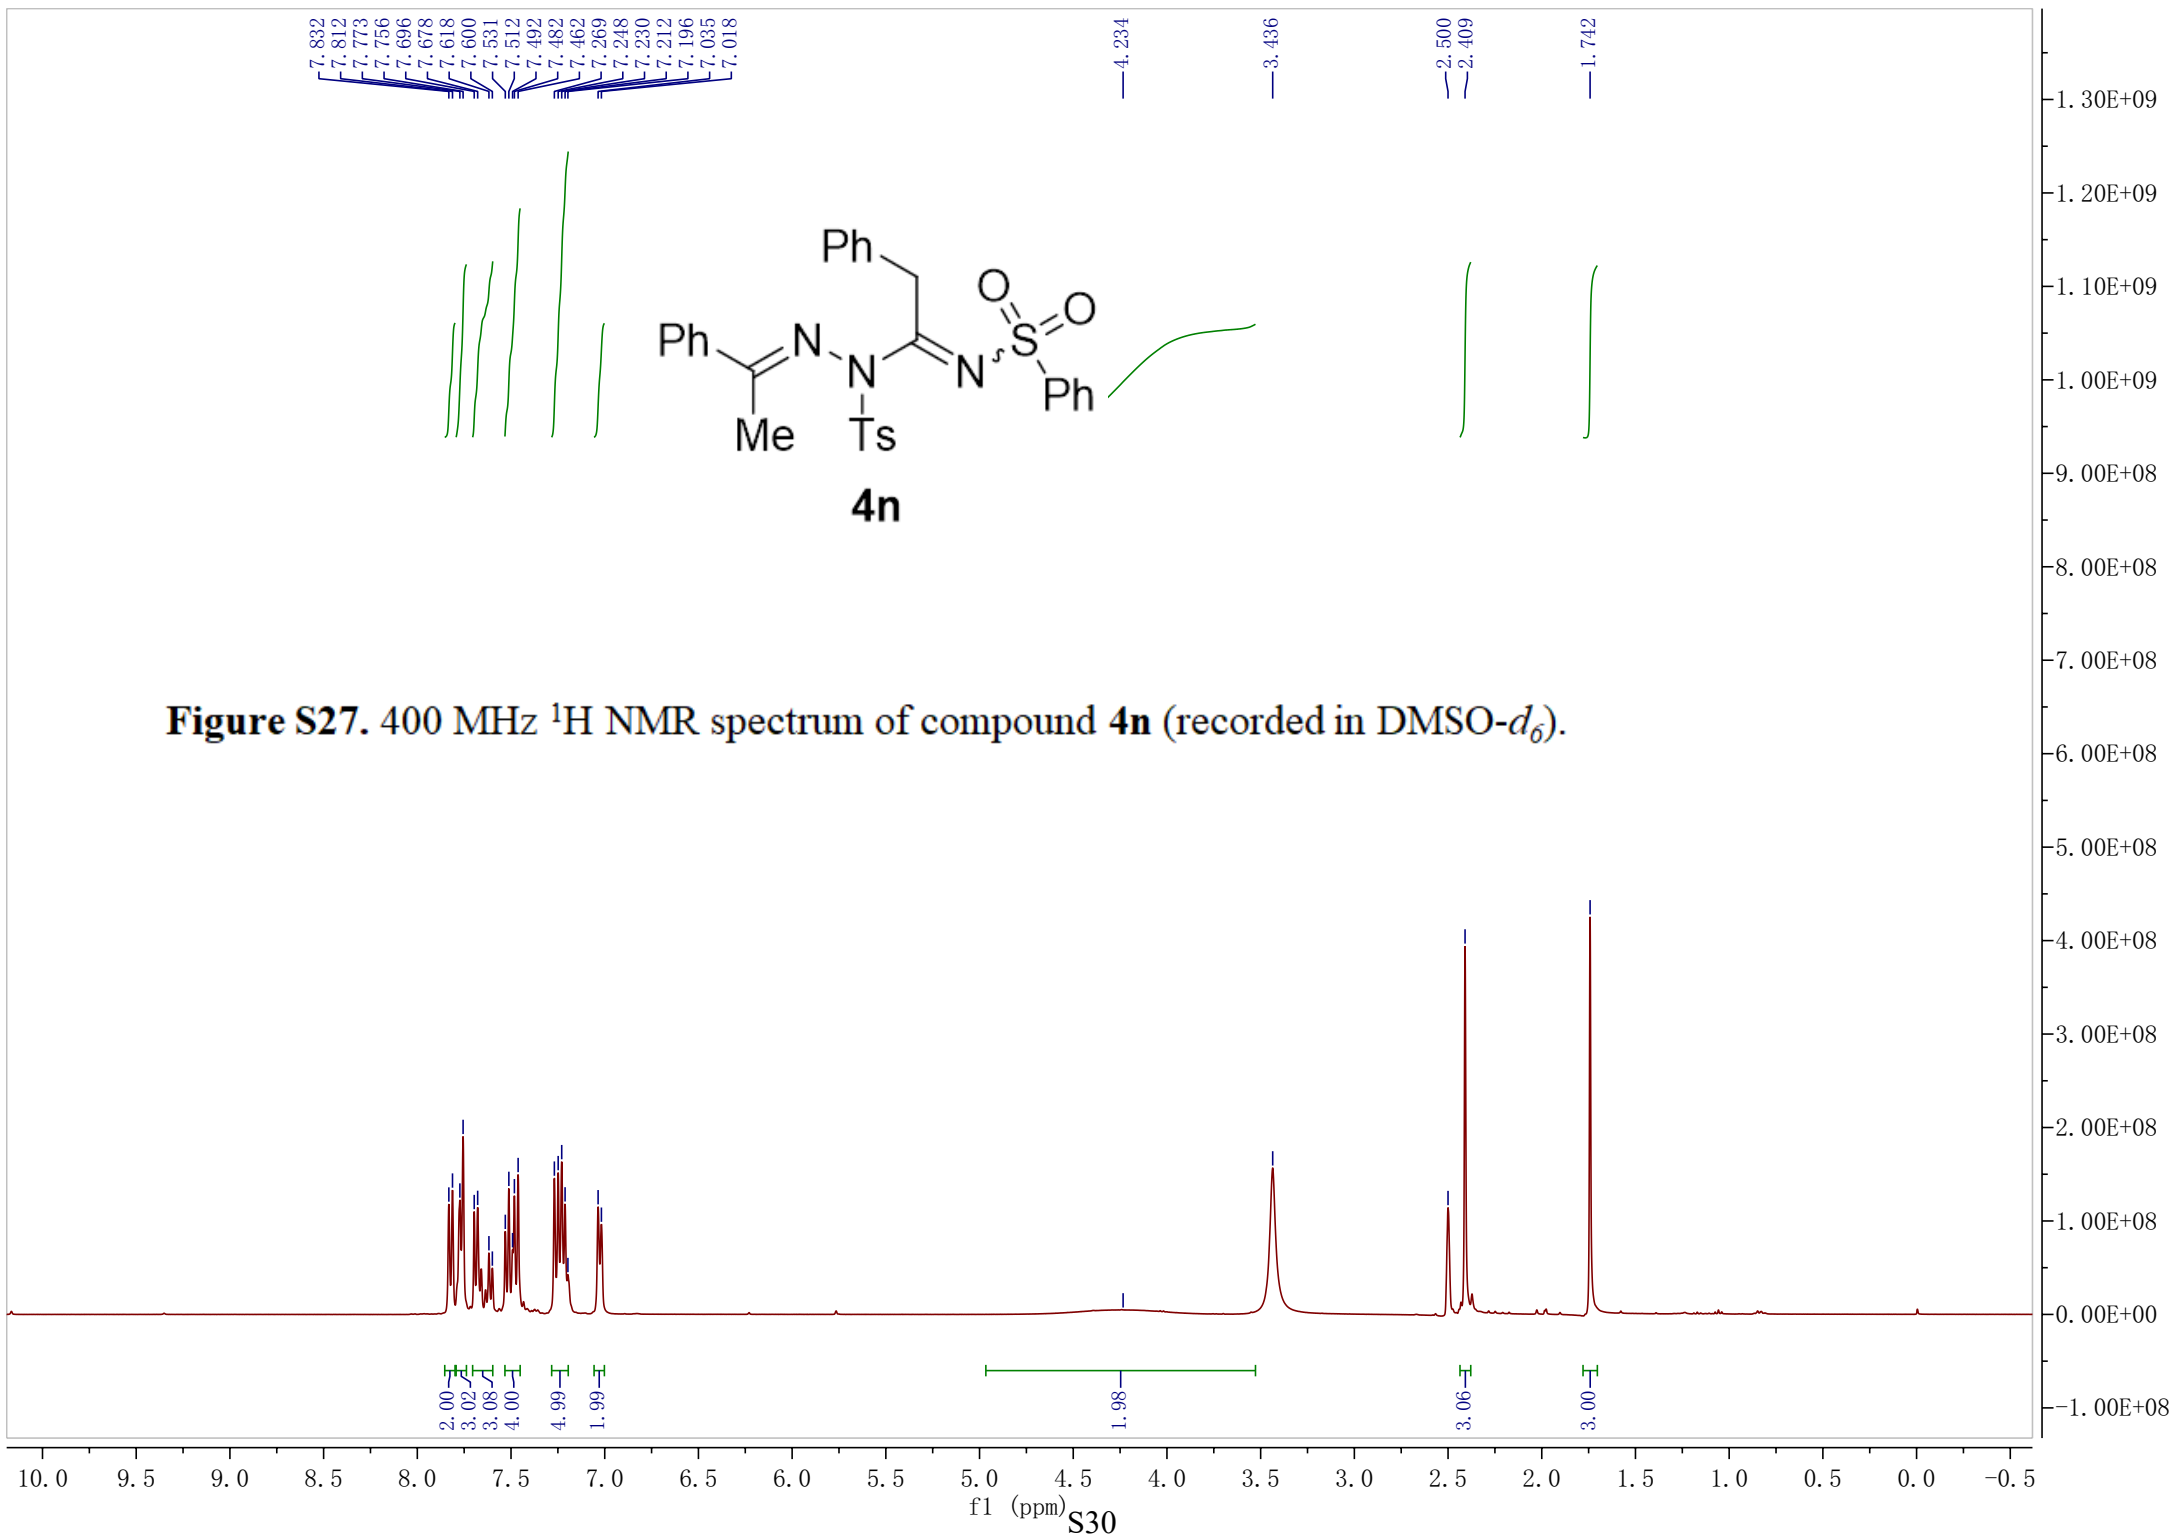

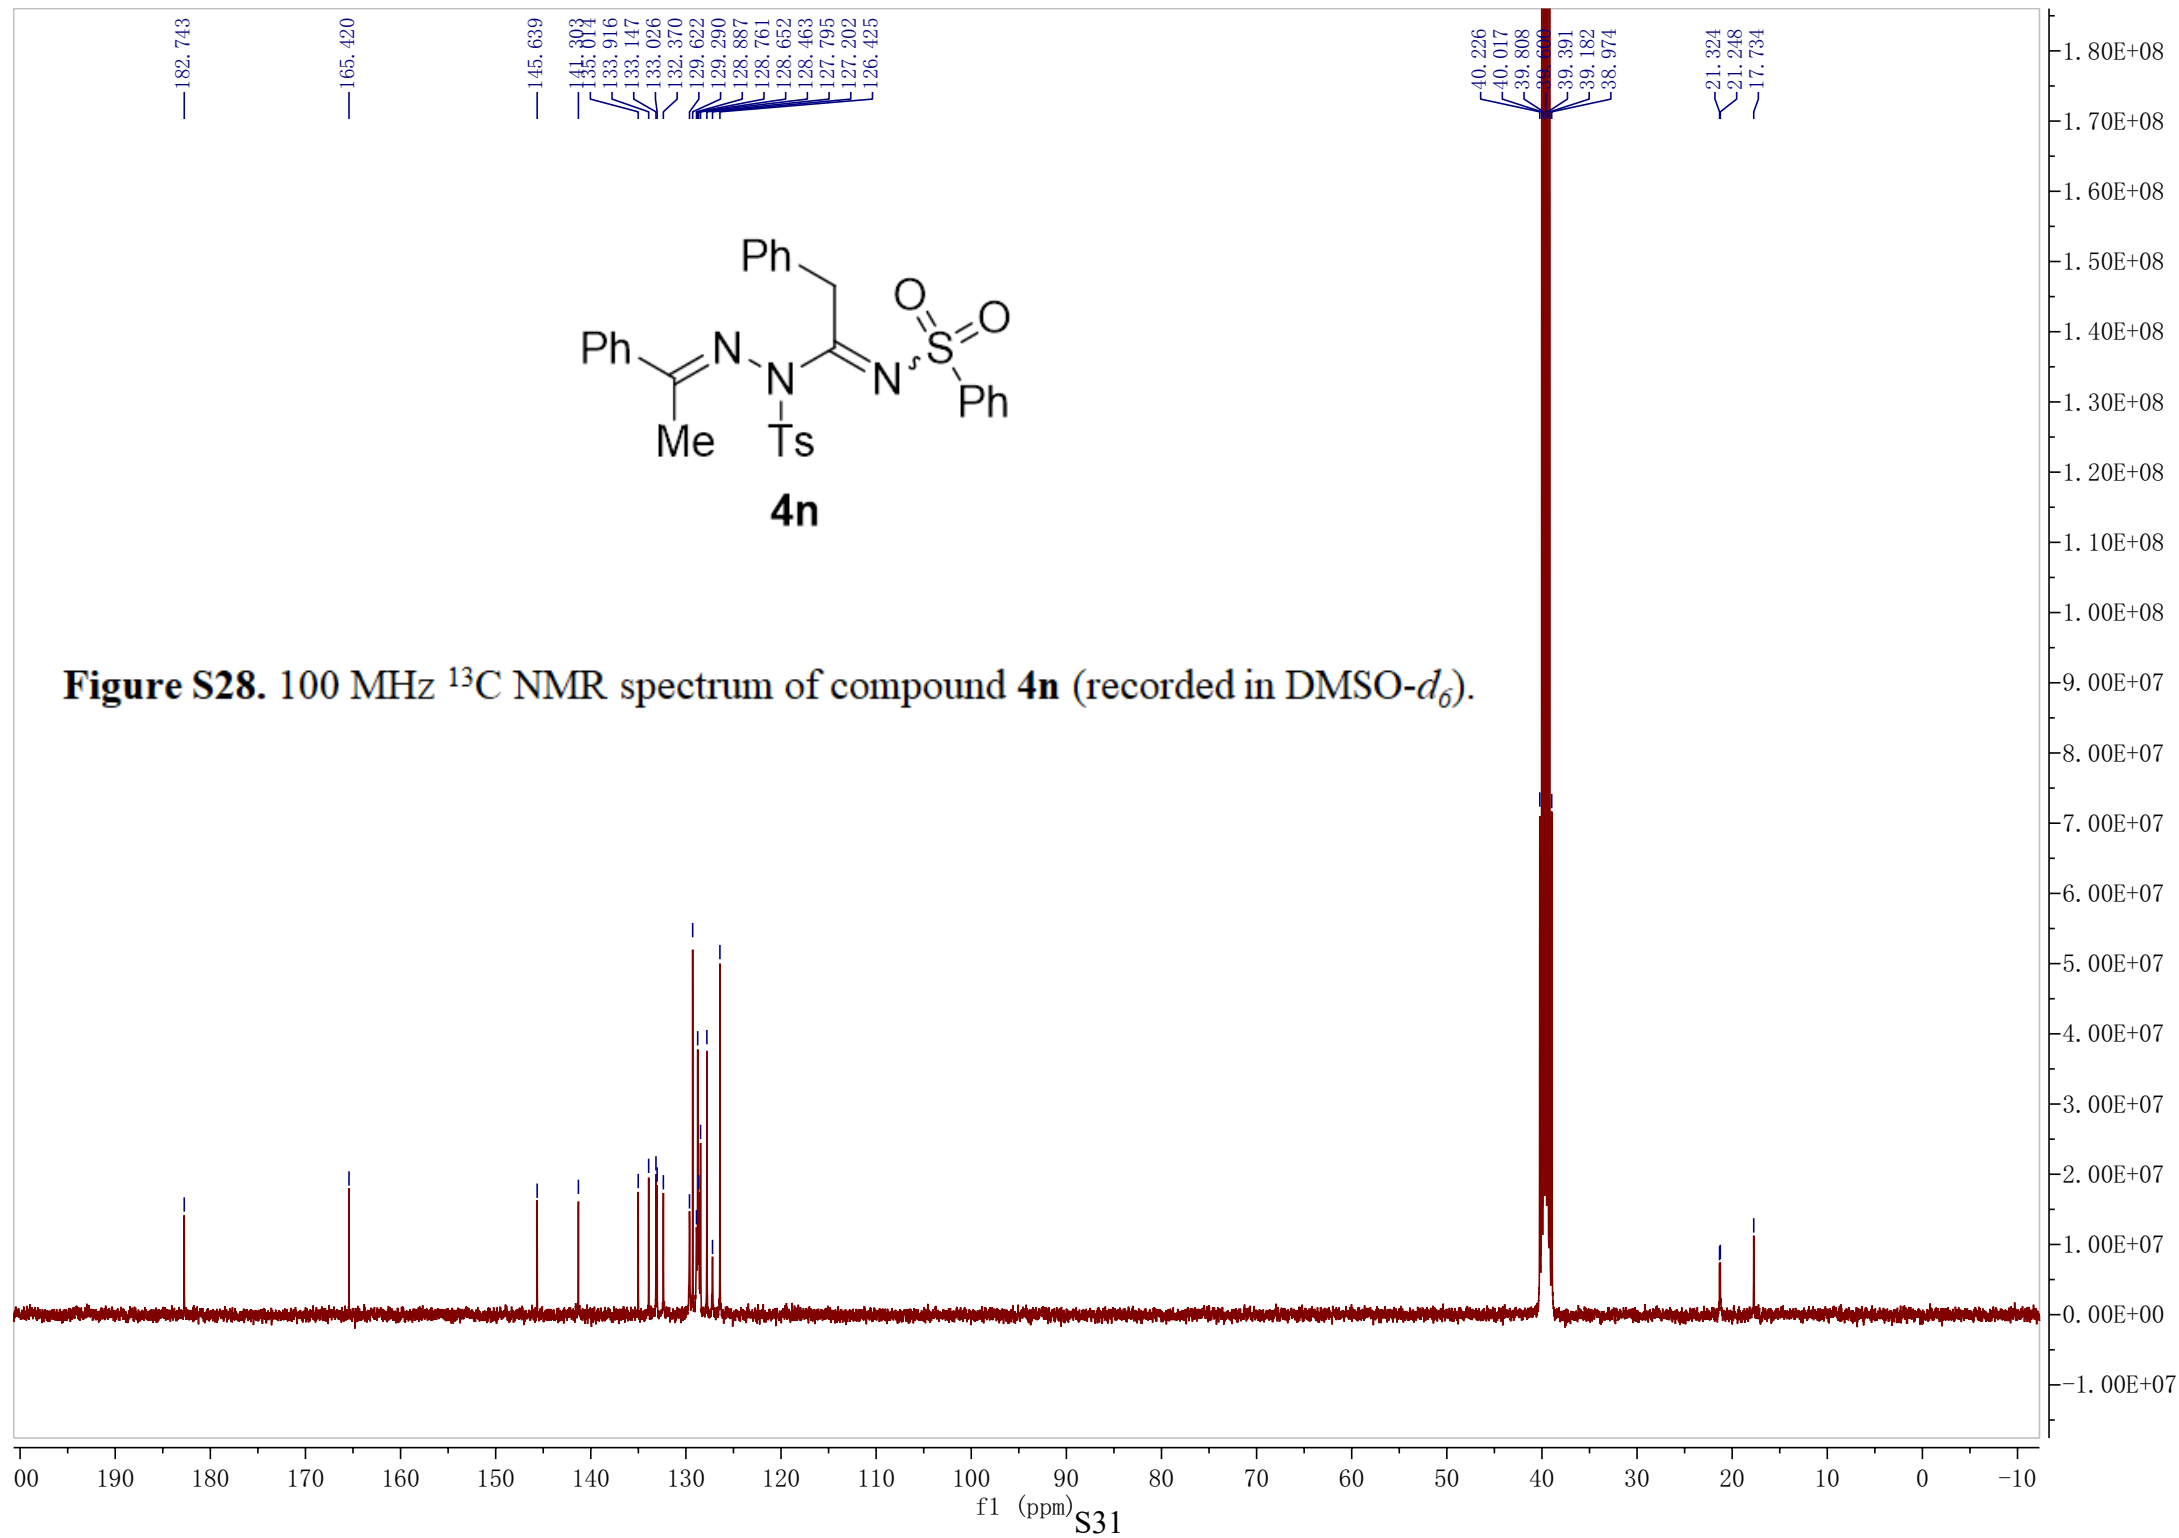

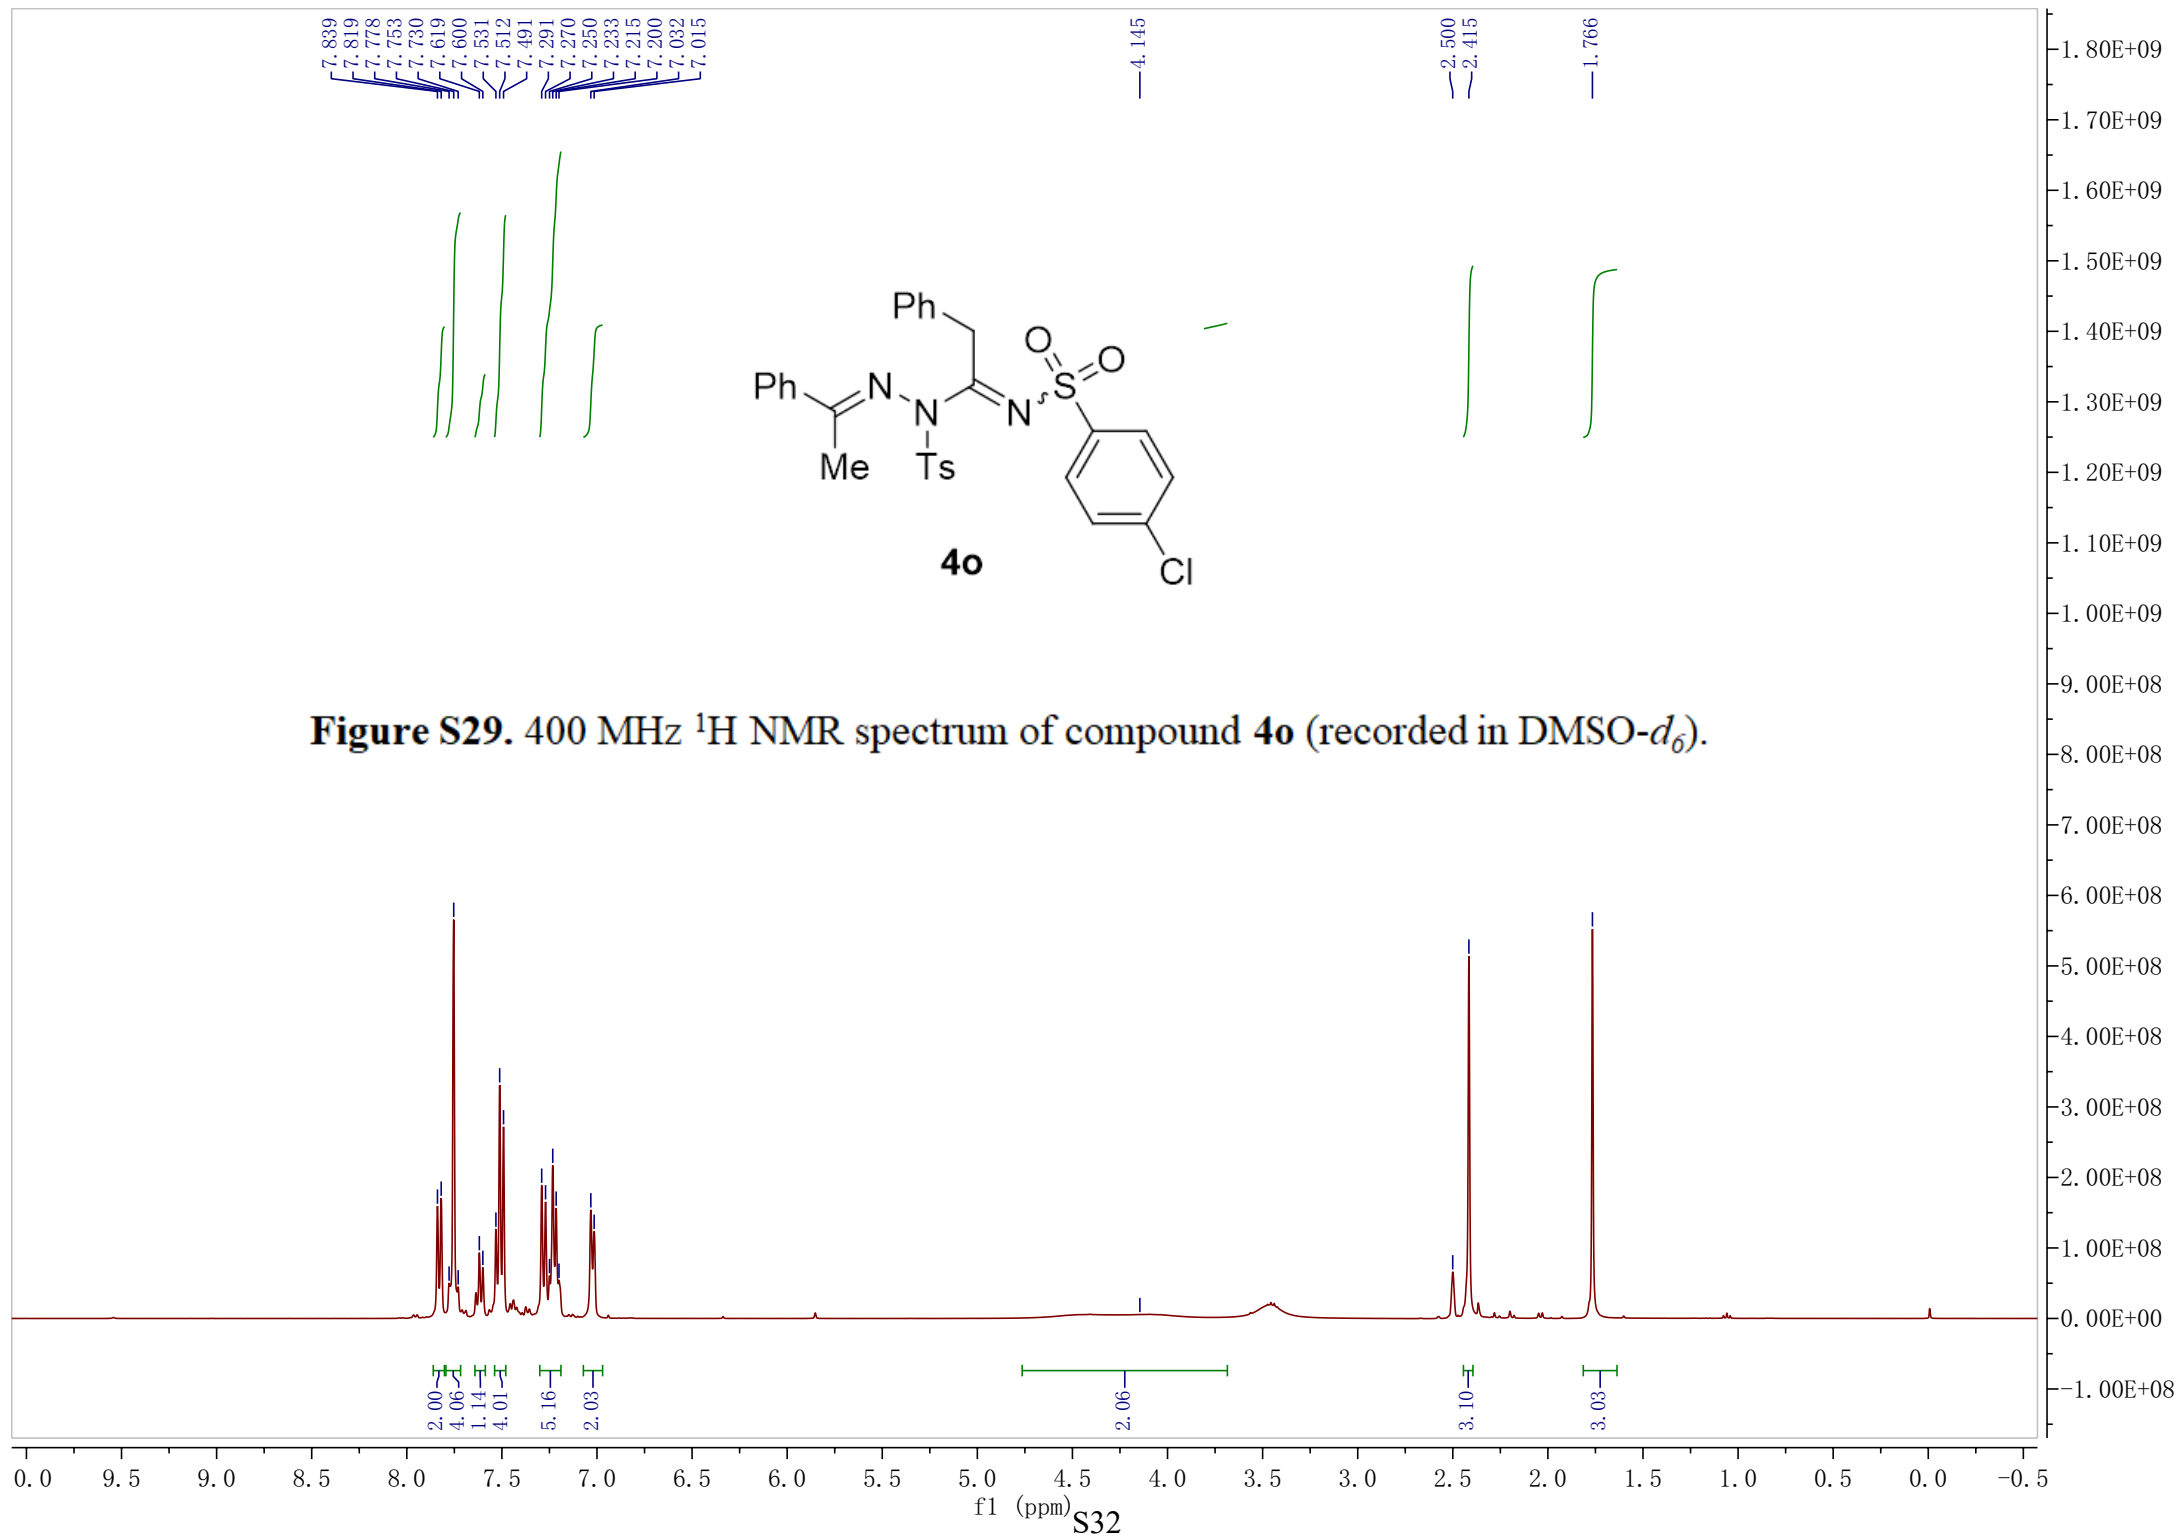



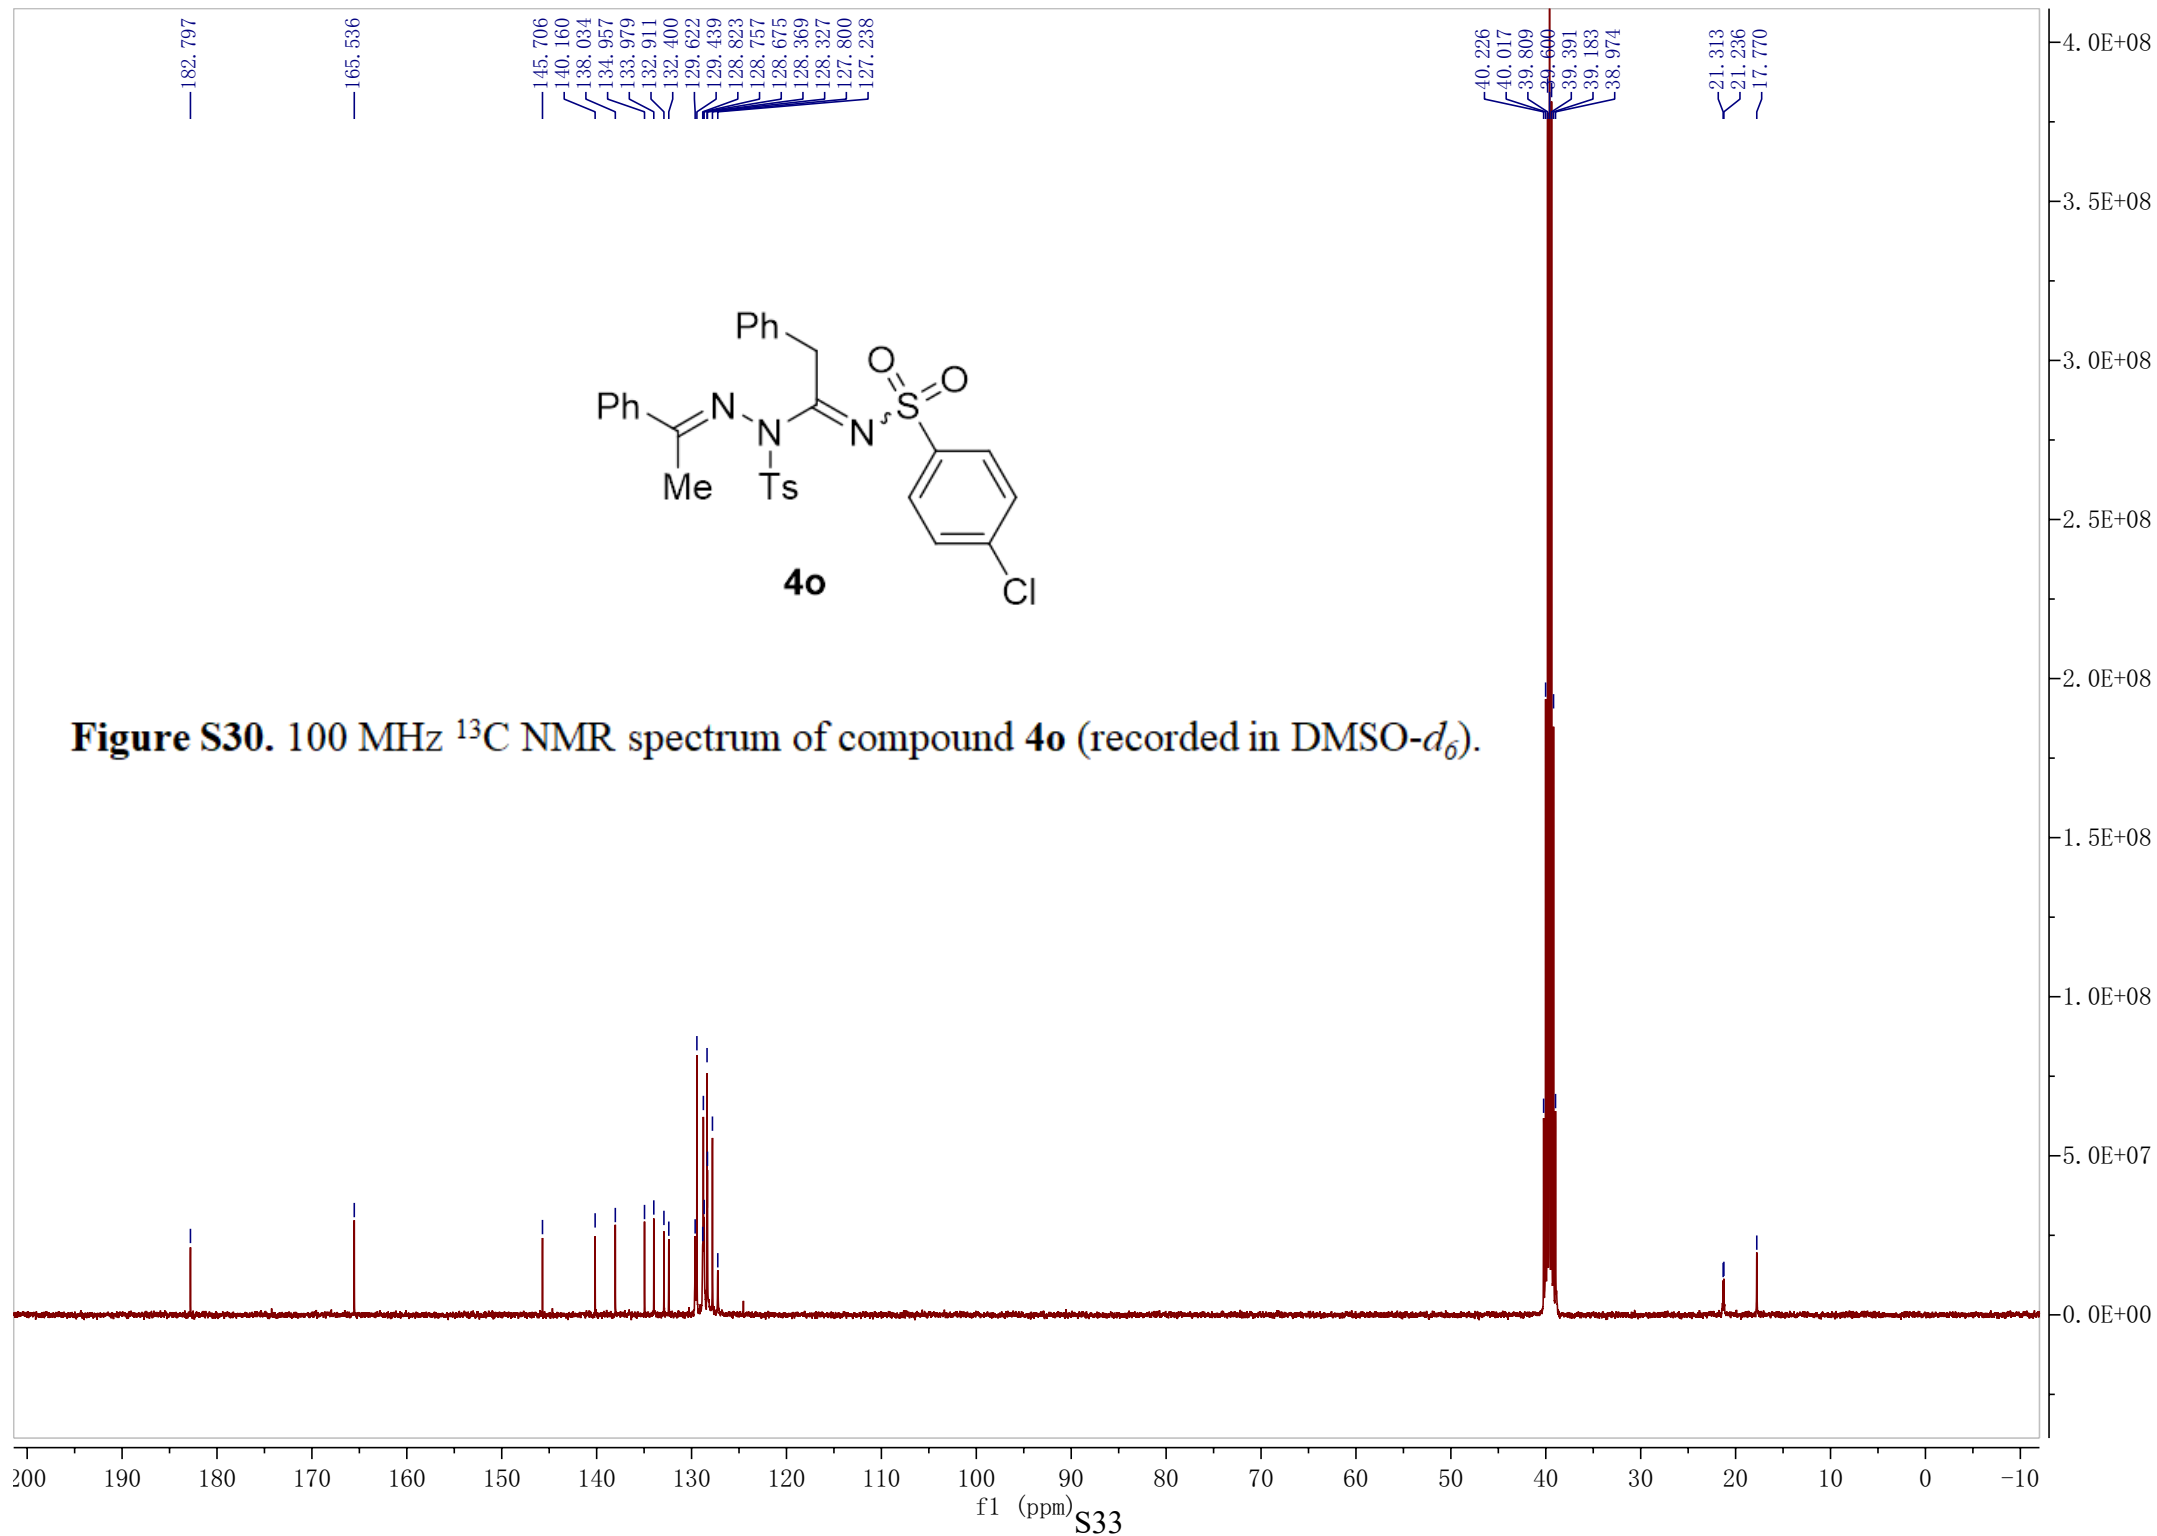

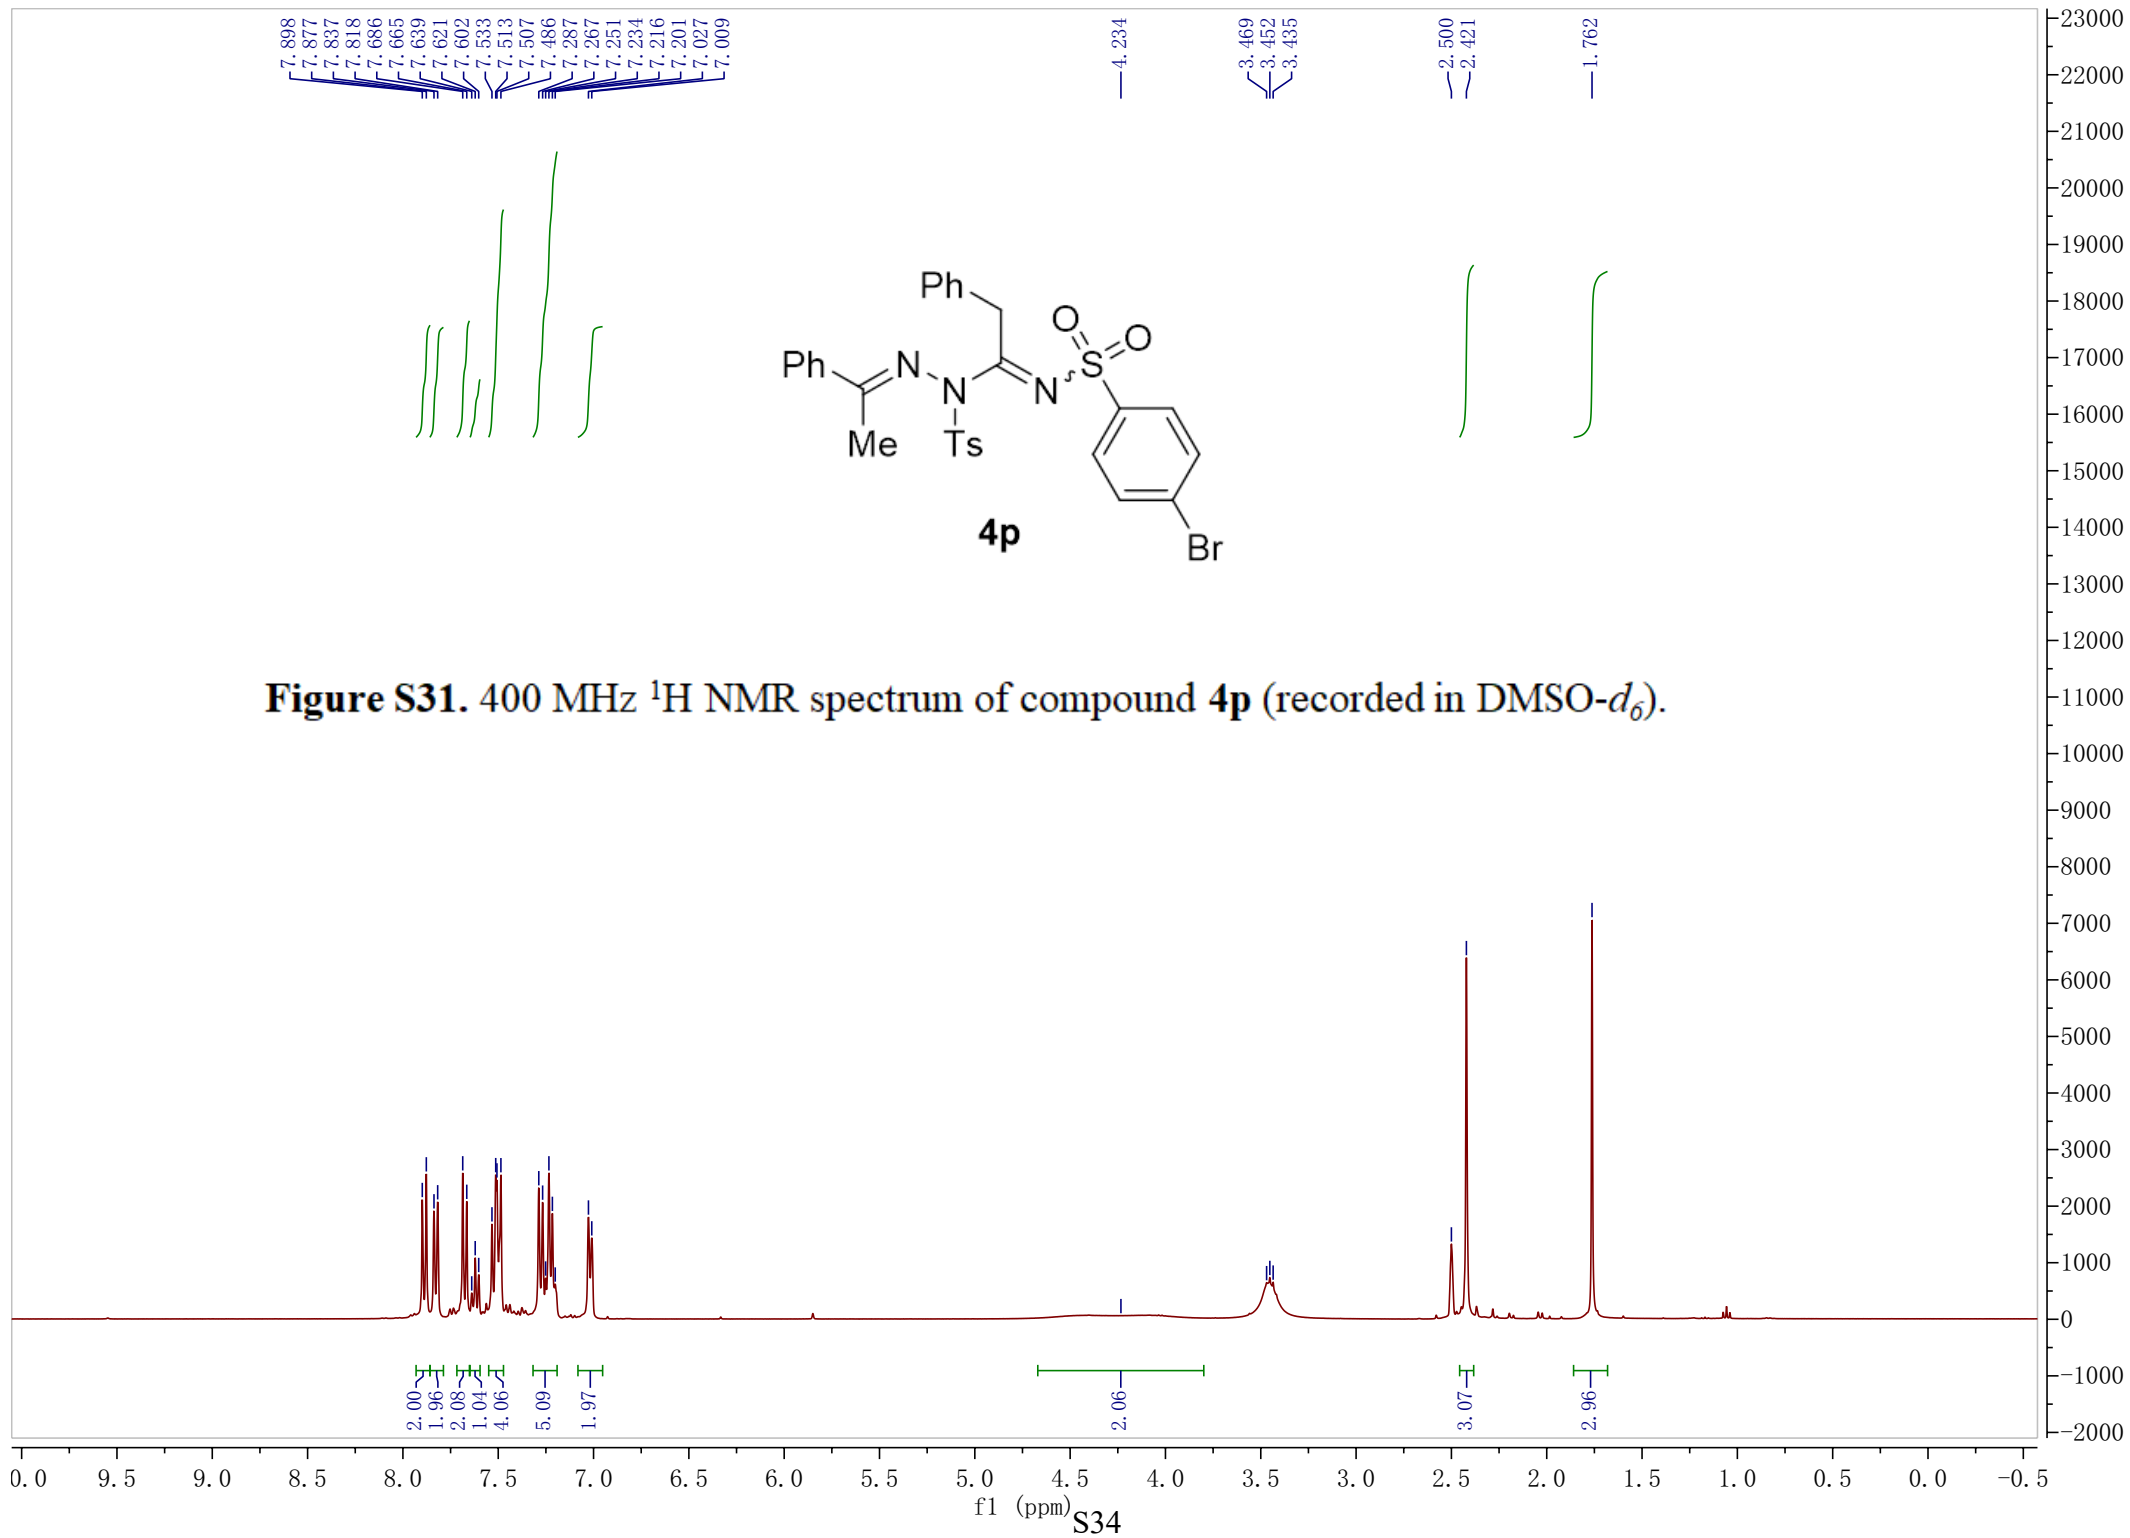

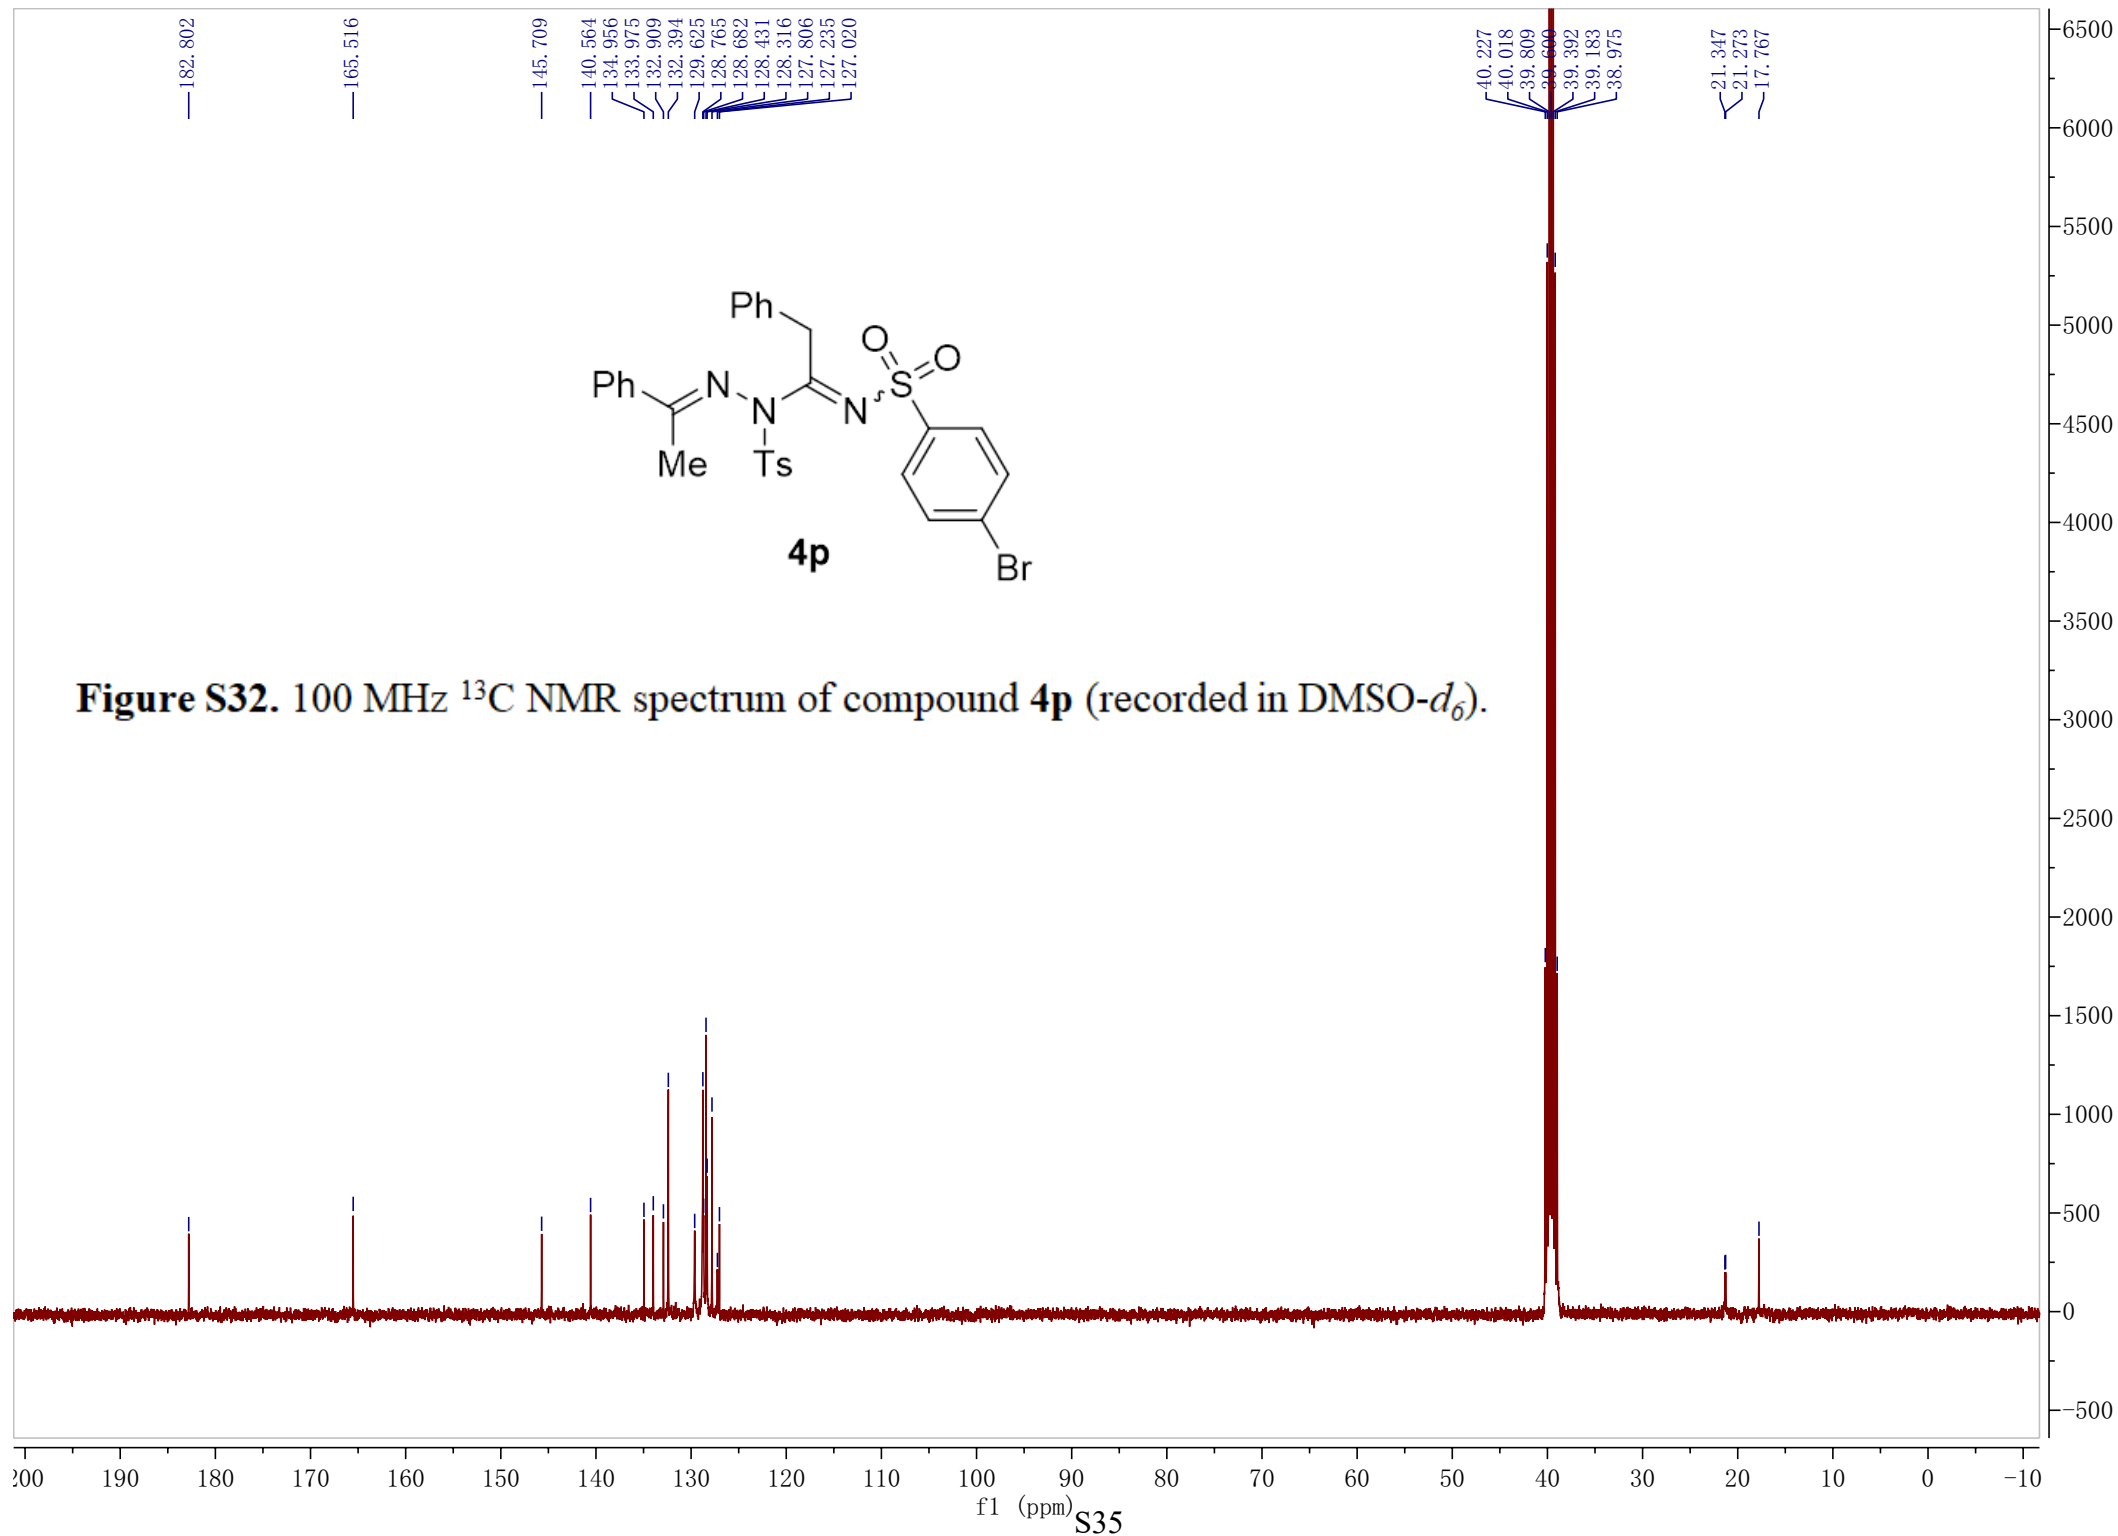

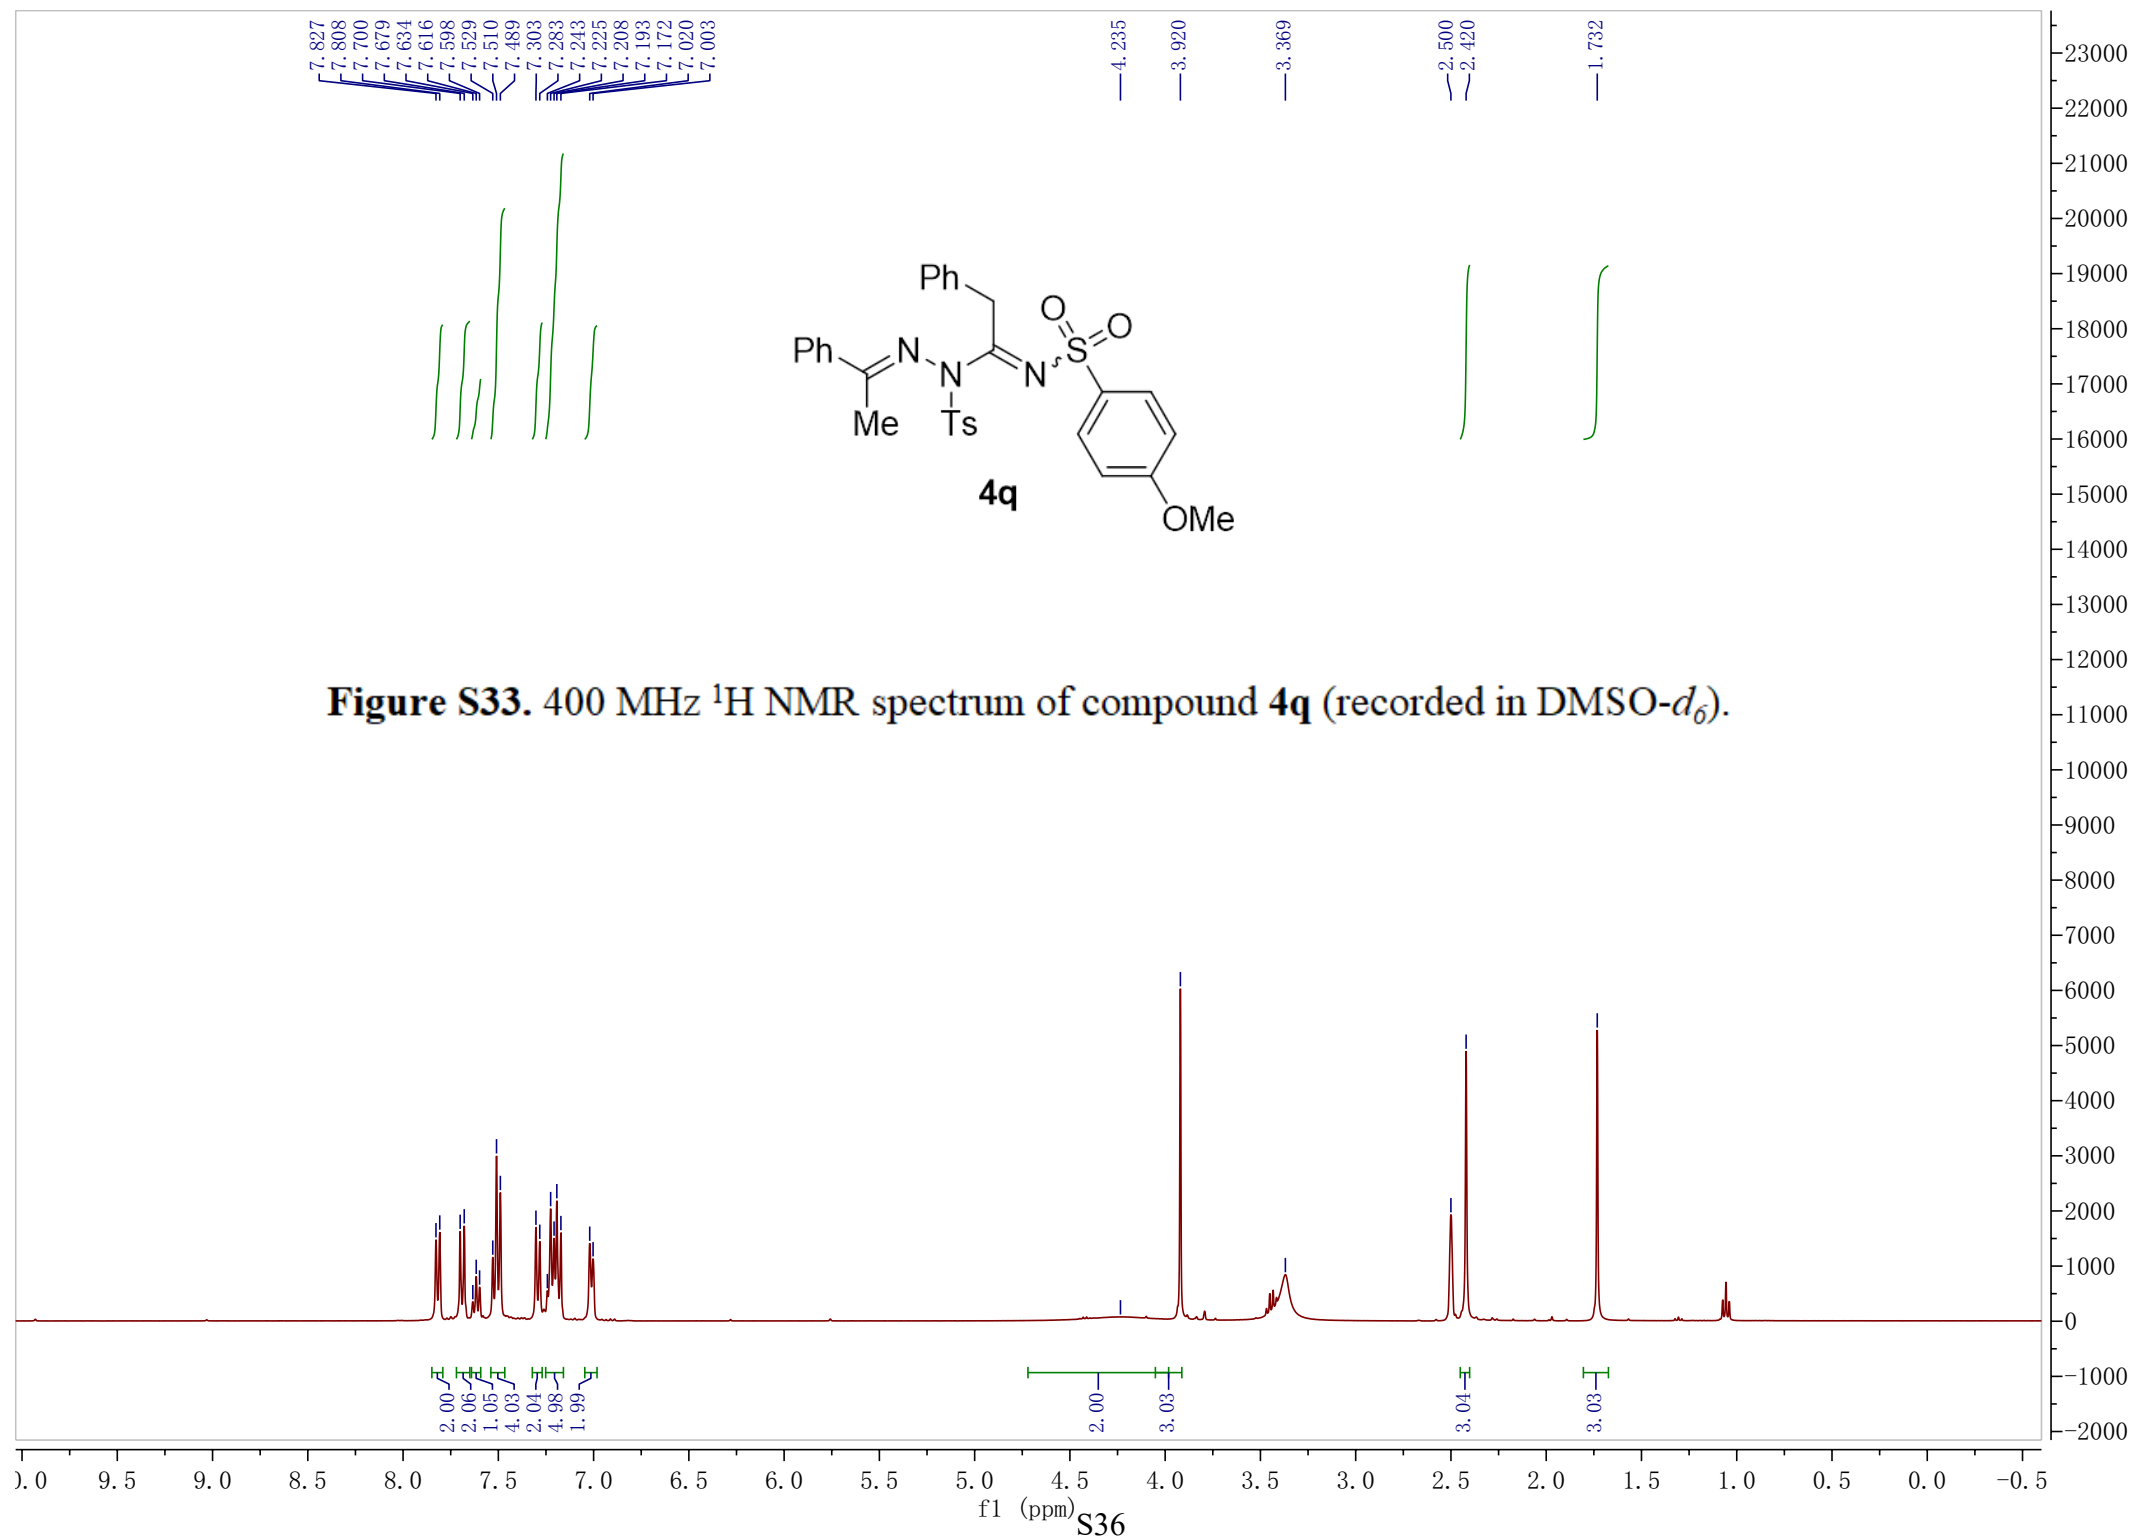

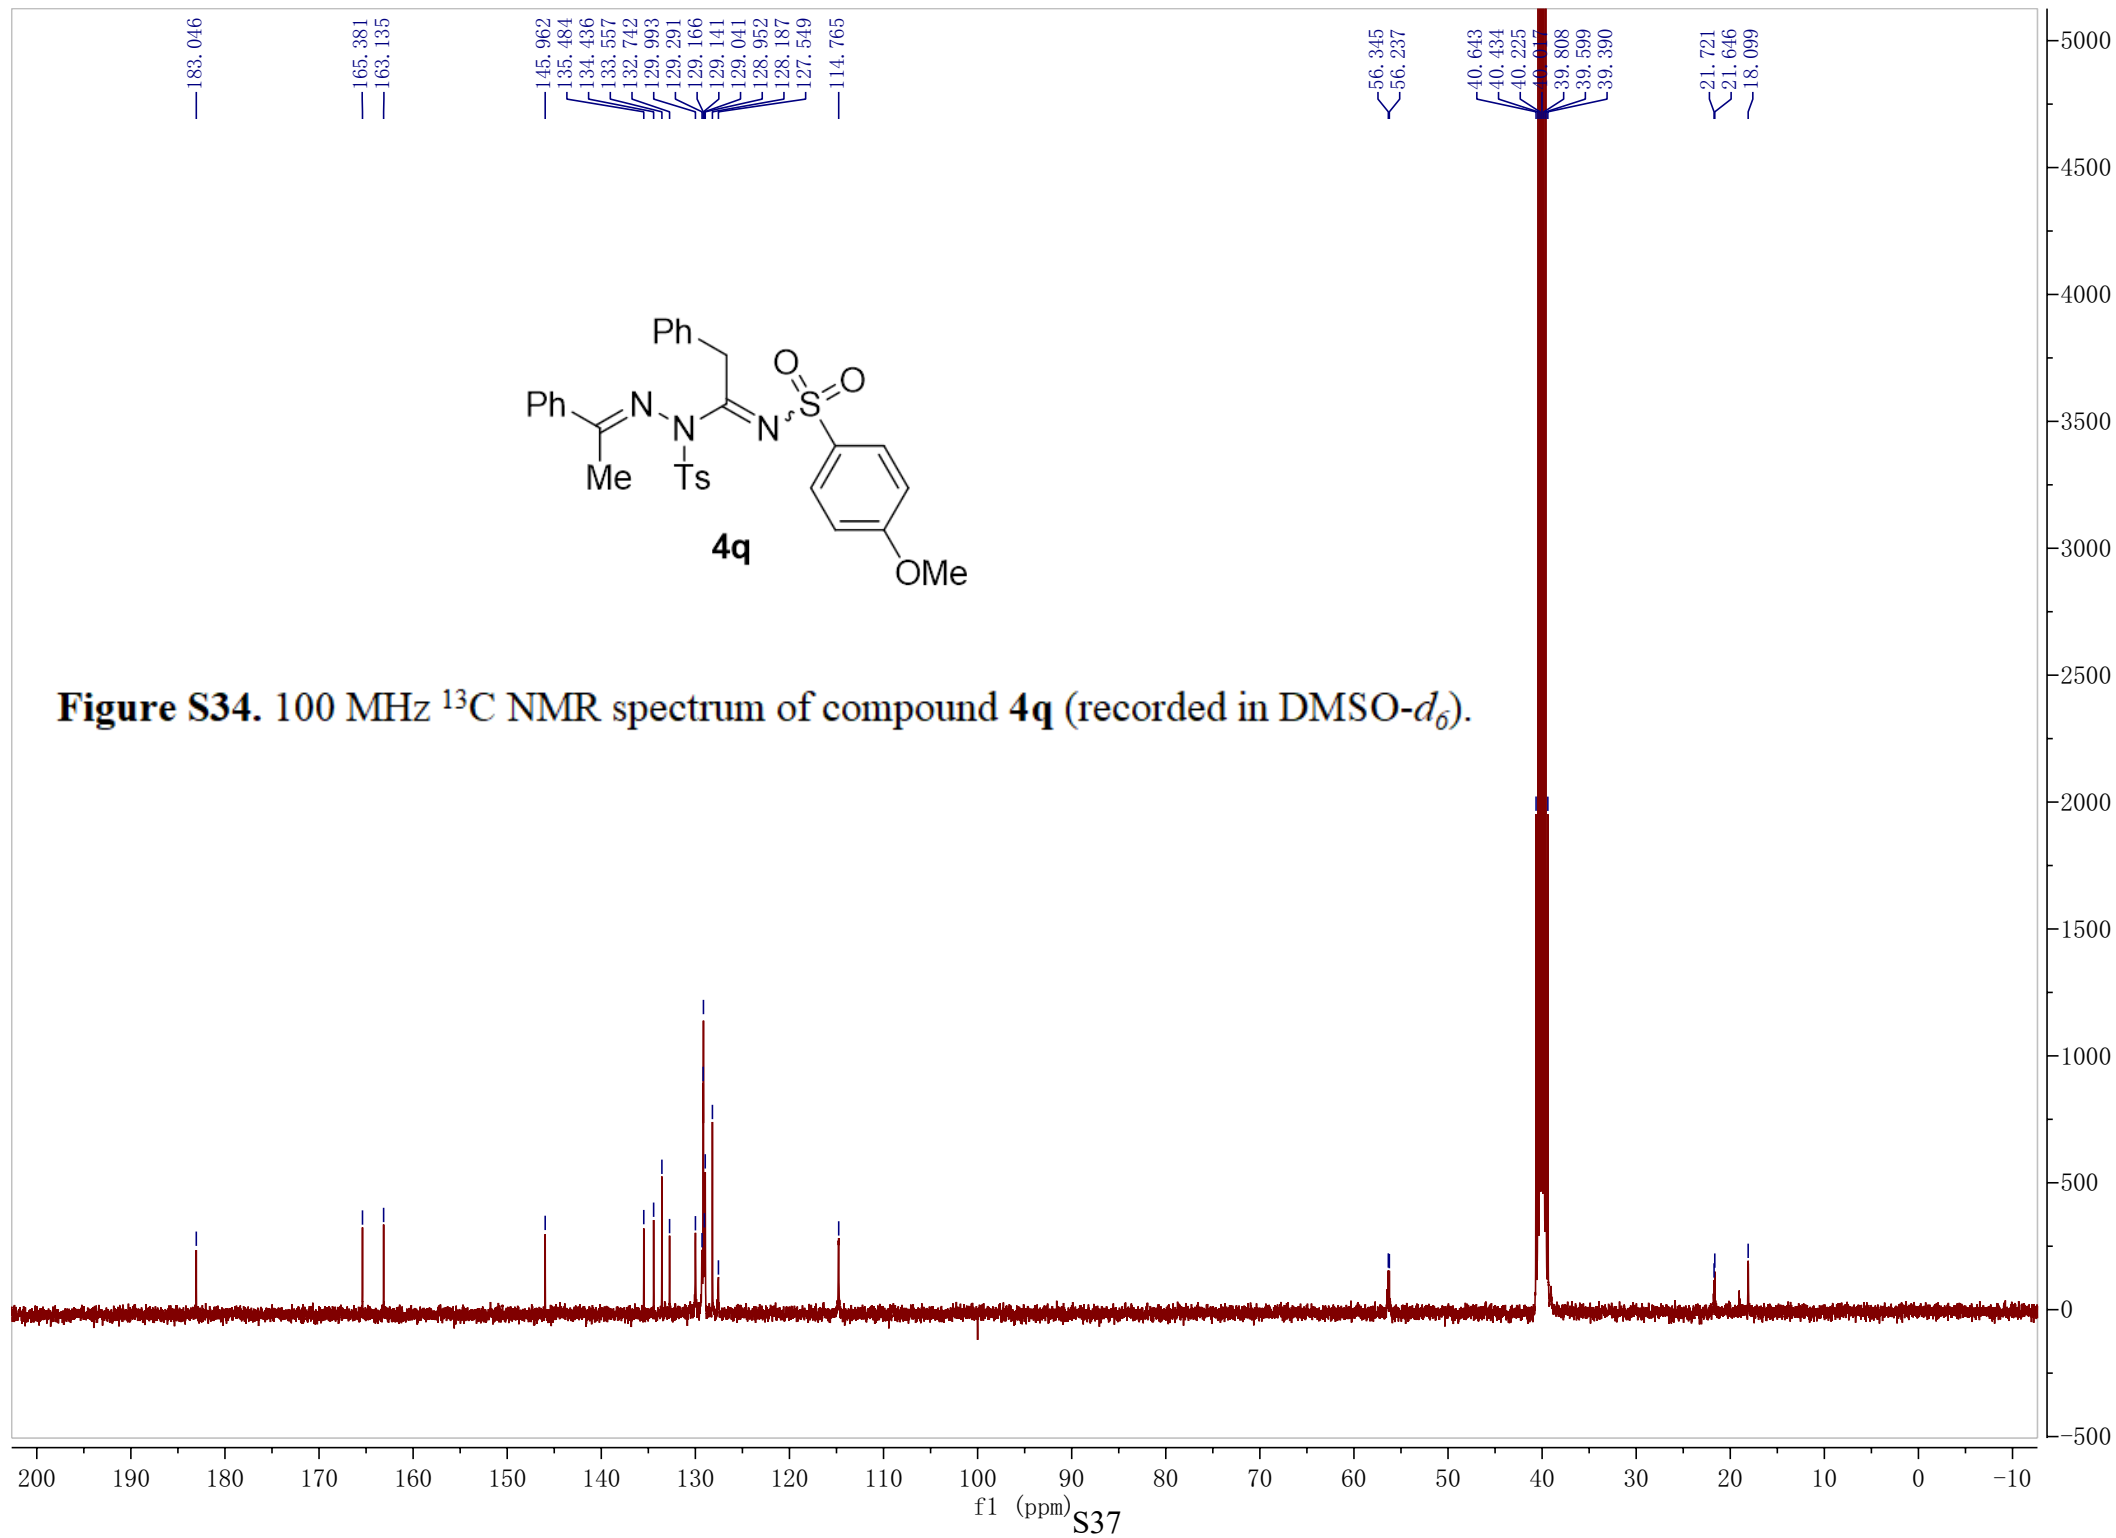

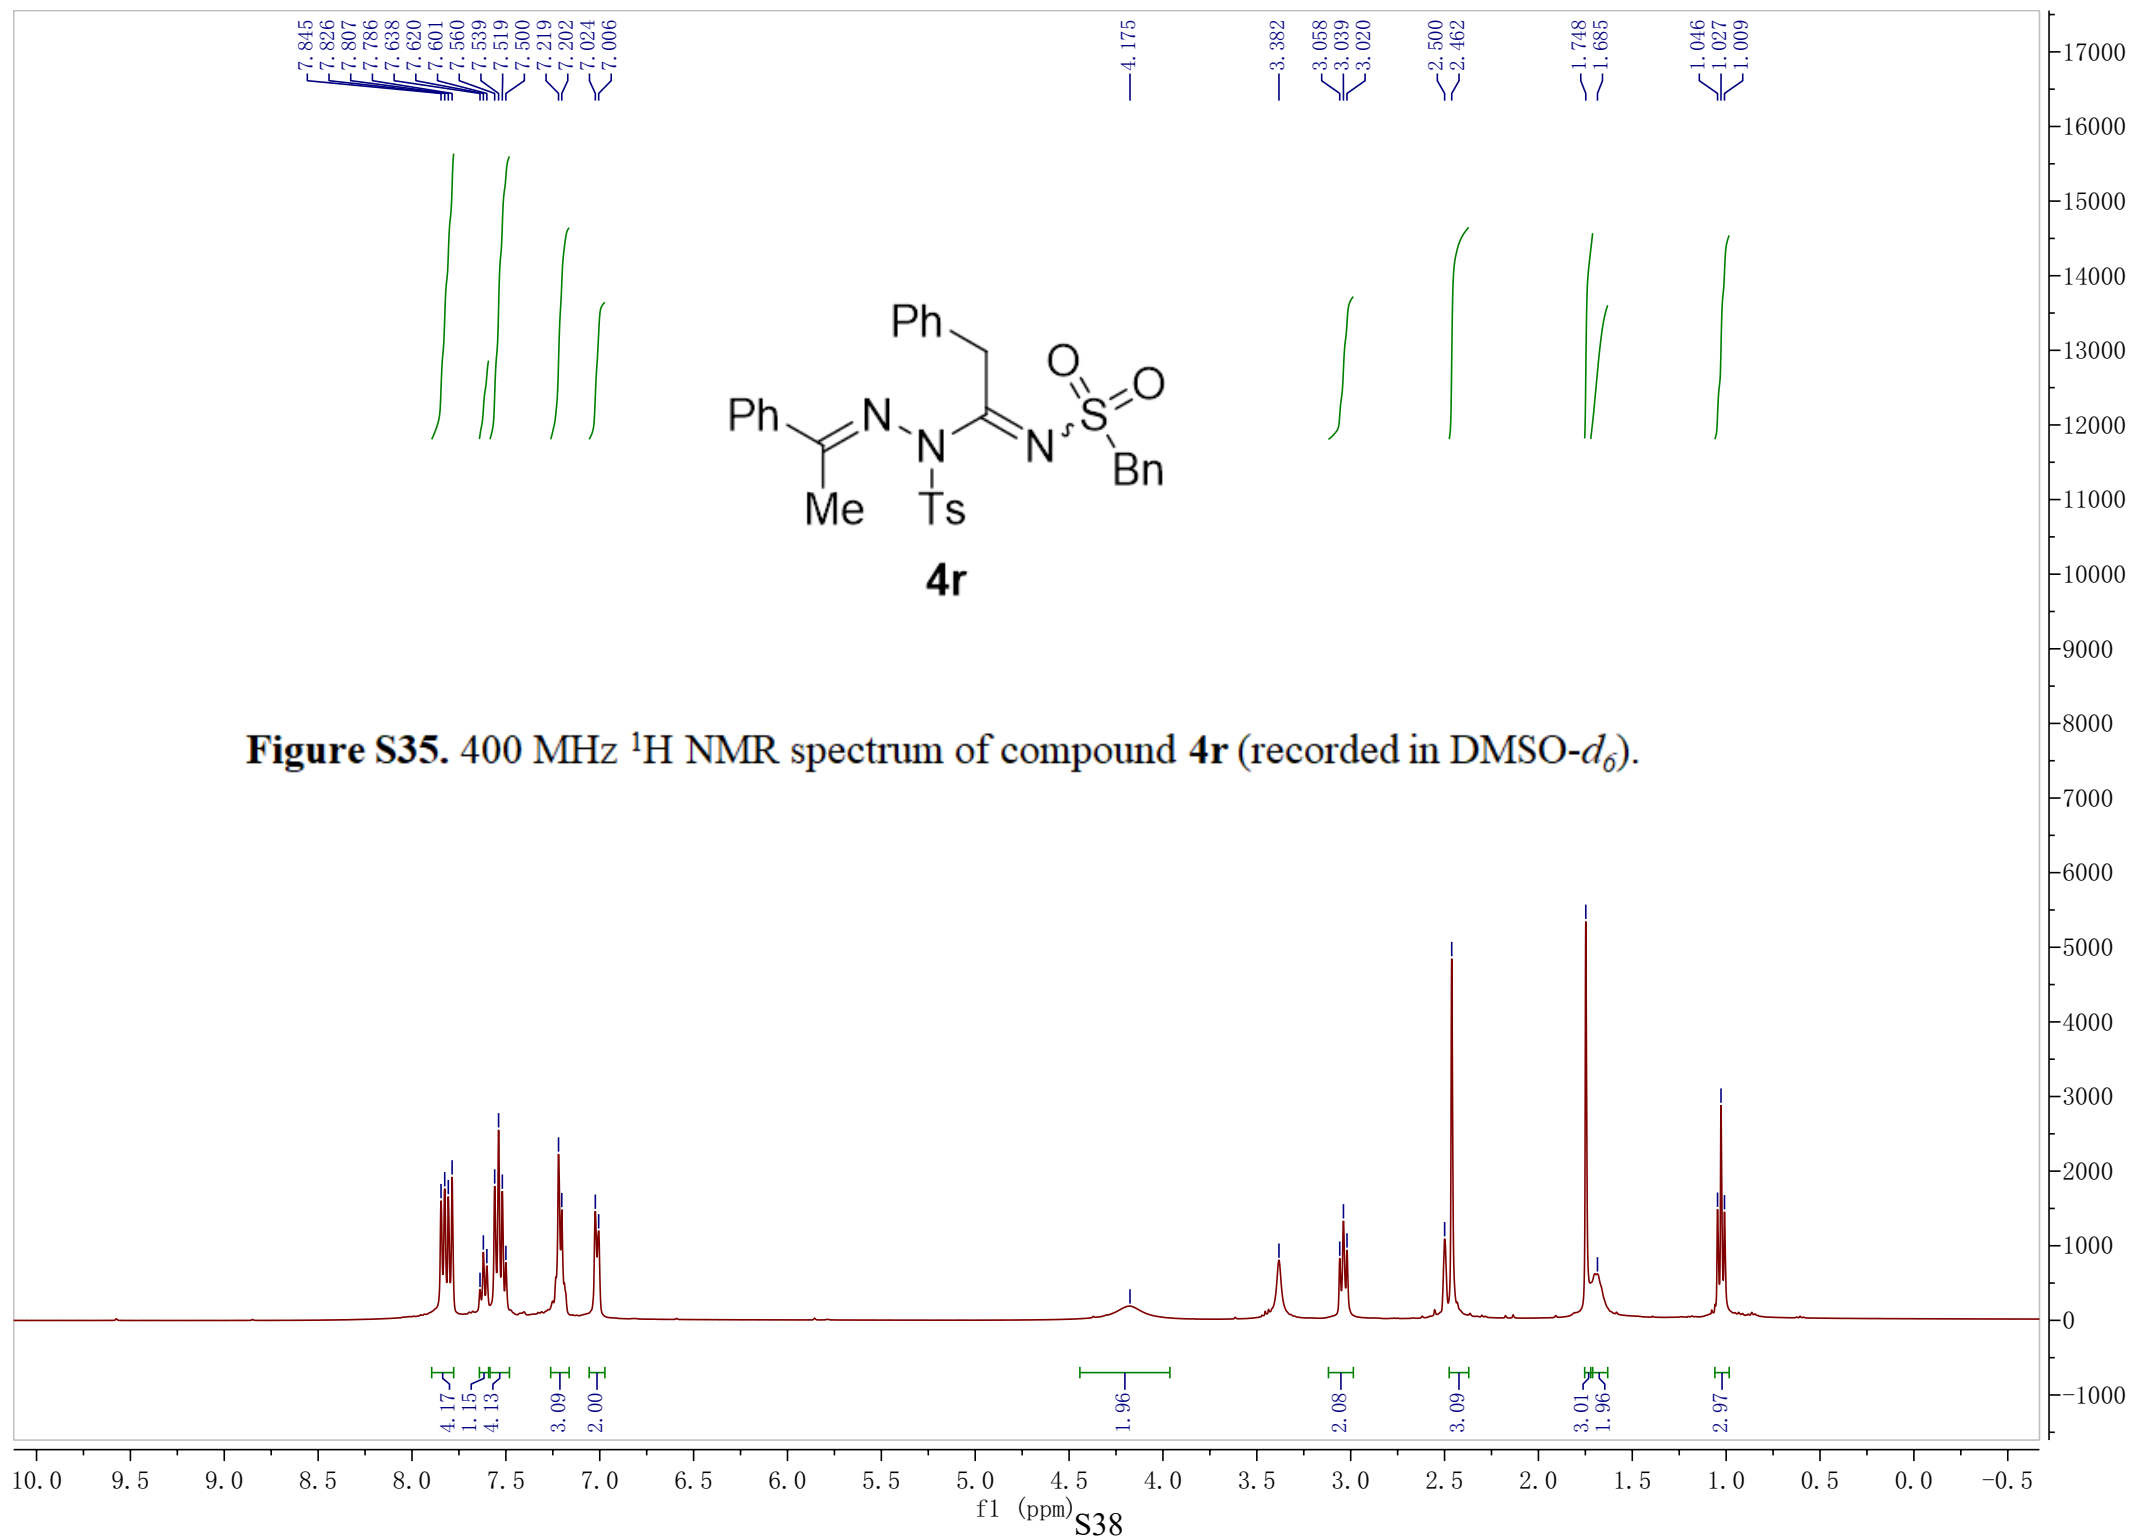

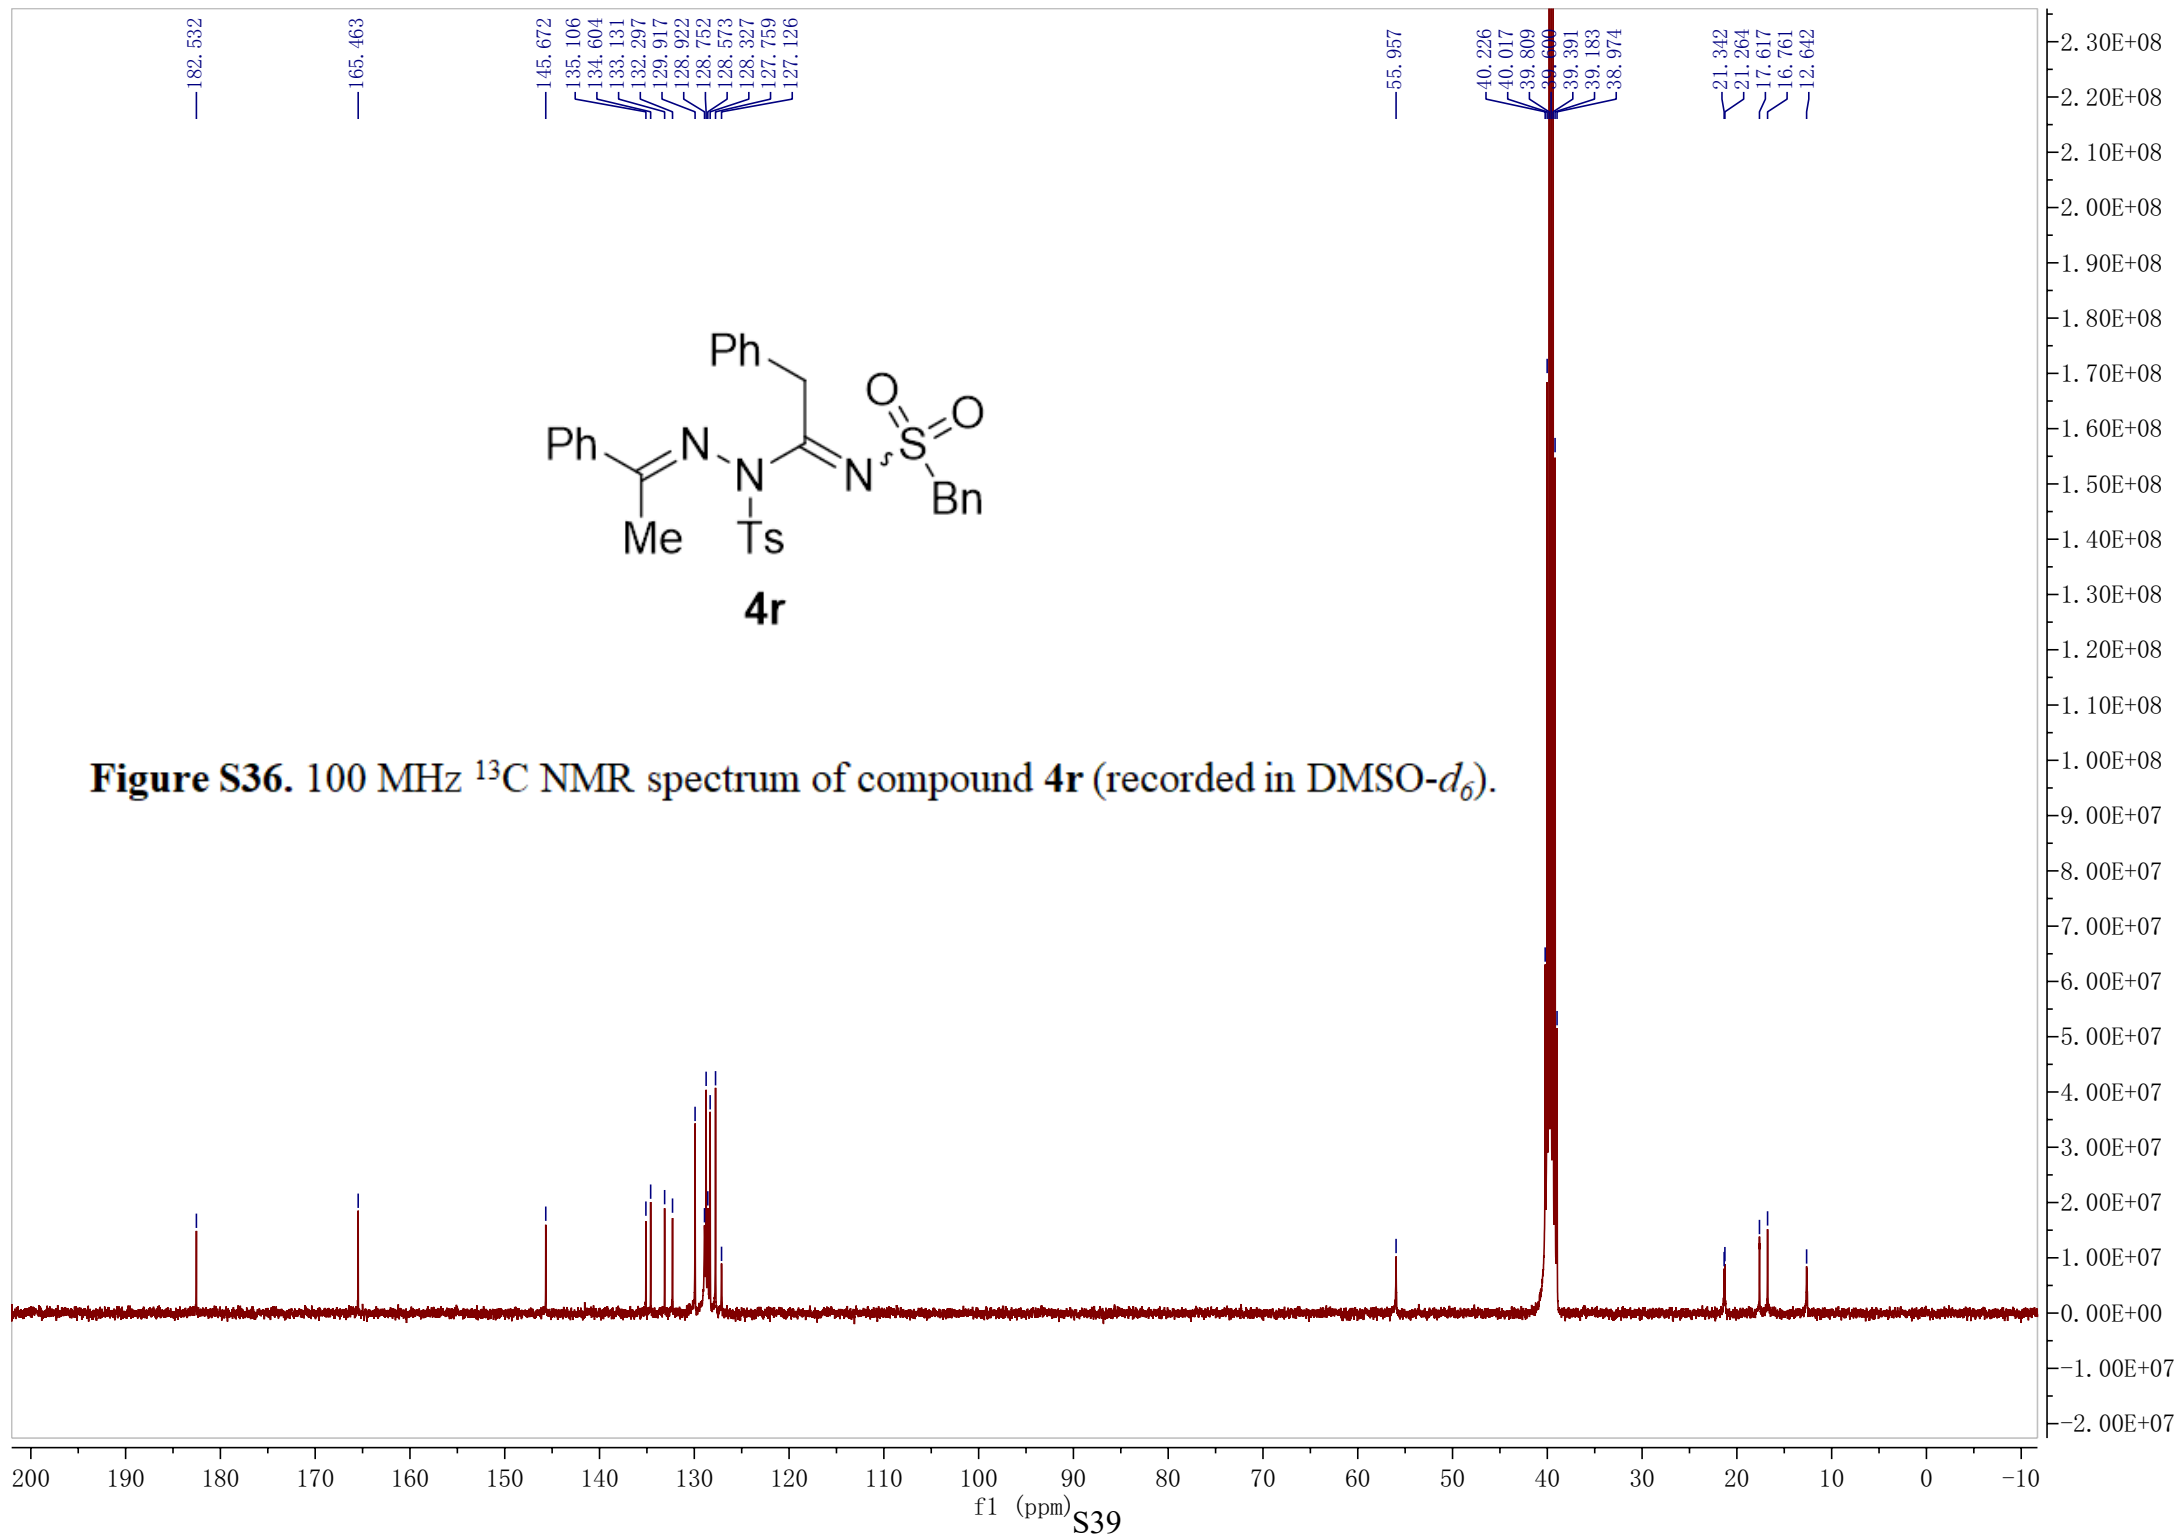

Supplement: s1 [file s1]
